# Supplementary material for: Adaptive Molecular Evolution of PHYE in Primulina, a Karst Cave Plant
Source: PubMed Central journal article supplement (PMC4452542; doi:10.1371/journal.pone.0127821), 2015-06-01
Supplement: pone.0127821.s002.pdf [file pone.0127821.s002.pdf]

## S2. Alignment of 74 partial sequences of *PHYE*.

|                                                | 10          | 20         | 30         | 40         | 50         | 60          |
|------------------------------------------------|-------------|------------|------------|------------|------------|-------------|
| <i>P. bicolor</i>                              | CAGTACAAATG | CCGATGCGAG | GCTGATGGCT | GAATTTGAGC | AGTCCGGTAA | GTC TGGTAAG |
| <i>P. bipinnatifida</i>                        | CAGTACAAATG | CCGATGCGAG | GCTGATGGCT | GAATTTGAGC | AGTCCGGTAA | GTC TGGTAAG |
| <i>P. chizhouensis</i>                         | CAGTACAAATG | CCGATGCGAG | GCTGATGGCT | GAATTTGAGC | AGTCCGGTAA | GTC TGGTAAG |
| <i>P. cordata</i>                              | CAGTACAAATG | CCGATGCGAG | GCTGATGGCT | GAATTTGAGC | AGTCCGGTAA | GTC TGGTAAG |
| <i>P. depressa</i>                             | CAGTACAAATG | CCGATGCGAG | GCTGATGGCT | GAATTTGAGC | AGTCCGGTAA | GTC TGGTAAG |
| <i>P. dongguanica</i>                          | CAGTACAAATG | CCGATGCGAG | GCTGATGGCT | GAATTTGAGC | AGTCCGGTAA | GTC TGGTAAG |
| <i>P. eburnea</i>                              | CAGTACAAATG | CCGATGCGAG | GCTGATGGCT | GAATTTGAGC | AGTCCGGTAA | GTC TGGTAAG |
| <i>P. fimbrisejala</i>                         | CAATACAAATG | CCGATGCGAG | GCTGATGGCT | GAATTTGAGC | AGTCCGGTAA | GTC TGGTAAG |
| <i>P. glandulosa</i> var. <i>yangshuoensis</i> | CAGTACAAATG | CCGATGCGAG | GCTGATGGCT | GAATTTGAGC | AGTCCGGTAA | GTC TGGTAAG |
| <i>P. guelinensis</i> var. <i>brachycar</i>    | CAGTACAAATG | CCGACGCGAG | GCTGATGGCT | GAATTTGAGC | AGTCCGATAA | GTC TGGTAAG |
| <i>P. guihaiensis</i>                          | CAGTACAAATG | CCGATGCGAG | GCTGATGGCT | GAATTTGAGC | AGTCCGGTAA | GTC TGGTAAG |
| <i>P. heterotricha</i> & <i>P. pterippoda</i>  | CAGTACAAATG | CCGATGCGAG | GCTGATGGCT | GAATTTGAGC | AGTCCGGTAA | GTC TGGTAAG |
| <i>P. hochiensis</i>                           | CAGTACAAATG | CCGATGCGAG | GCTGATGGCT | GAATTTGAGC | AGTCCGGTAA | GTC TGGTAAG |
| <i>P. huaijiensis</i>                          | CAGTACAAATG | CCGATGCGAG | GCTGATGGCT | GAATTTGAGC | AGTCCGGTAA | GTC TGGTAAG |
| <i>P. langshanica</i>                          | CAGTACAAATG | CCGATGCGAG | GCTGATGGCT | GAATTTGAGC | AGTCCGGTAA | GTC TGGTAAG |
| <i>P. latinervis</i>                           | CAGTACAAATG | CCGATGCGAG | GCTGATGGCT | GAATTTGAGC | AGTCCGGTAA | GTC TGGTAAG |
| <i>P. laxiflora</i>                            | CAGTACAAATG | CCGATGCGAG | GCTGATGGCT | GAATTTGAGC | TGTCGGTAA  | GTC TGGTAAG |
| <i>P. leprosa</i>                              | CAGTACAAATG | CCGATGCGAG | GCTGATGGCT | GAATTTGAGC | AGTCCGGTAA | GTC TGGTAAG |
| <i>P. liguliformis</i>                         | CAGTACAAATG | CCGATGCGAG | GCTGATGGCT | GAATTTGAGC | AGTCCGGTAA | GTC TGGTAAG |
| <i>P. lijiangensis</i>                         | CAGTACAAATG | CCGATGCGAG | GCTGATGGCT | GAATTTGAGC | AGTCCGGTAA | GTC TGGTAAG |
| <i>P. linearifolia</i>                         | CAGTACAAATG | CCGATGCGAG | GCTGATGGCT | GAATTTGAGC | AGTCCGGTAA | GTC TGGTAAG |
| <i>P. lobulata</i>                             | CAGTACAAATG | CCGATGCGAG | GCTGATGGCT | GAATTTGAGC | AGTCCGGTAA | GTC TGGTAAG |
| <i>P. longii</i>                               | CAGTACAAATG | CCGATGCGAG | GCTGATGGCT | GAATTTGAGC | AGTCCGGTAA | GTC TGGTAAG |
| <i>P. lunglinensis</i>                         | CAGTACAAATG | CCGATGCGAG | GCTGATGGCT | GAATTTGAGC | AGTCCGGTAA | GTC TGGTAAG |
| <i>P. lungzhouensis</i>                        | CAGTACAAATG | CCGATGCGAG | GCTGATGGCT | GAATTTGAGC | AGTCCGGTAA | GTC TGGTAAG |
| <i>P. luochengensis</i>                        | CAGTACAAATG | CCGATGCGAG | GCTGATGGCT | GAATTTGAGC | AGTCCGGTAA | GTC TGGTAAG |
| <i>P. lutea</i>                                | CAGTACAAATG | CCGATGCGAG | GCTGATGGCT | GAATTTGAGC | AGTCTGGTAA | GTC TGGTAAG |
| <i>P. mabaensis</i>                            | CAGTACAAATG | CCGATGCGAG | GCTGATGGCT | GAATTTGAGC | AGTCCGGTAA | GTC TGGTAAG |
| <i>P. macrodonta</i>                           | CAGTACAAATG | CCGATGCGAG | GCTGATGGCT | GAATTTGAGC | AGTCCGGTAA | GTC TGGTAAG |
| <i>P. medica</i>                               | CAGTACAAATG | CCGATGCGAG | GCTGATGGCT | GAATTTGAGC | AGTCCGGTAA | GTC TGGTAAG |
| <i>P. moii</i>                                 | CAGTACAAATG | CCGATGCGAG | GCTGATGGCT | GAATTTGAGC | AGTCCGGTAA | GTC TGGTAAG |
| <i>P. mollifolia</i>                           | CAGTACAAATG | CCGATGCGAG | GCTGATGGCT | GAATTTGAGC | AGTCCGGTAA | GTC TGGTAAG |
| <i>P. obtusidentata</i>                        | CAGTACAAATG | CCGATGCGAG | GCTGATGGCT | GAATTTGAGC | AGTCCGGTAA | GTC TGGTAAG |
| <i>P. orthandra</i>                            | CAGTACAAATG | CCGATGCGAG | GCTGATGGCT | GAATTTGAGC | AGTCCGGTAA | GTC TGGTAAG |
| <i>P. parvifolia</i>                           | CAGTACAAATG | CCGATGCGAG | GCTGATGGCT | GAATTTGAGC | AGTCCGGTAA | GTC TGGTAAG |
| <i>P. pinnatifida</i>                          | CAGTACAAATG | CCGATGCGAG | GCTGATGGCT | GAATTTGAGC | AGTCCGGTAA | GTC TGGTAAG |
| <i>P. pulchurifolia</i>                        | CAGTACAAATG | CCGATGCGAG | GCTGATGGCT | GAATTTGAGC | AGTCCGGTAA | GTC TGGTAAG |
| <i>P. renifolia</i>                            | CAGTACAAATG | CCGATGCGAG | GCTGATGGCT | GAATTTGAGC | AGTCCGGTAA | GTC TGGTAAG |
| <i>P. repanda</i>                              | CAGTACAAATG | CCGATGCGAG | GCTGATGGCT | GAATTTGAGC | AGTCCGGTAA | GTC TGGTAAG |
| <i>P. ronganensis</i>                          | CAGTACAAATG | CCGATGCGAG | GCTGATGGCT | GAATTTGAGC | AGTCCGGTAA | GTC TGGTAAG |
| <i>P. sclerophylla</i>                         | CAGTACAAATG | CCGATGCGAG | GCTGATGGCT | GAATTTGAGC | AGTCCGGTAA | GTC TGGTAAG |
| <i>P. sinensis</i>                             | CAGTACAAATG | CCGATGCGAG | GCTGATGGCT | GAATTTGAGC | AGTCCGGTAA | GTC TGGTAAG |
| <i>P. spinulosa</i>                            | CAGTACAAATG | CCGATGCGAG | GCTGATGGCT | GAATTTGAGC | AGTCCGGTAA | GTC TGGTAAG |
| <i>P. subrhomboidea</i>                        | CAGTACAAATG | CCGATGCGAG | GCTGATGGCT | GAATTTGAGC | AGTCCGGTAA | GTC TGGTAAG |
| <i>P. subrhomboidea</i> var. <i>tribract</i>   | CAGTACAAATG | CCGATGCGAG | GCTGATGGCT | GAATTTGAGC | AGTCCGGTAA | GTC TGGTAAG |
| <i>P. subulata</i>                             | CAATACAAATG | CCGATGCGAG | GCTGATGGCT | GAATTTGAGC | AGTCTGGTAA | GTC TGGTAAG |
| <i>P. swinglei</i>                             | CAGTACAAATG | CCGATGCGAG | GCTGATGGCT | GAATTTGAGC | AGTCCGGTAA | GTC TGGTAAG |
| <i>P. tabacum</i>                              | CAGTACAAATG | CCGATGCGAG | GCTGATGGCT | GAATTTGAGC | AGTCTGGTAA | GTC TGGTAAG |
| <i>P. tenuifolia</i>                           | CAGTACAAATG | CCGATGCGAG | GCTGATGGCT | GAATTTGAGC | AGTCCGGTAA | GTC TGGTAAG |
| <i>P. tenuituba</i>                            | CAGTACAAATG | CCGATGCGAG | GCTGATGGCT | GAATTTGAGC | AGTCCGGTAA | GTC TGGTAAG |
| <i>P. tiandengensis</i>                        | CAGTACAAATG | CCGATGCGAG | GCTGATGGCT | GAATTTGAGC | AGTCCGGTAA | GTC TGGTAAG |
| <i>P. tribracteata</i>                         | CAGTACAAATG | CCGATGCGAG | GCTGATGGCT | GAATTTGAGC | AGTCCGGTAA | GTC TGGTAAG |
| <i>P. villosissima</i>                         | CAGTACAAATG | CCGATGCGAG | GCTGATGGCT | GAATTTGAGC | AGTCCGGTAA | GTC TGGTAAG |
| <i>P. wentsaii</i>                             | CAGTACAAATG | CCGATGCGAG | GCTGATGGCT | GAATTTGAGC | AGTCCGGTAA | GTC TGGTAAG |
| <i>P. xiuningensis</i>                         | CAGTACAAATG | CCGATGCGAG | GCTGATGGCT | GAATTTGAGC | AGTCCGGTAA | GTC TGGTAAG |
| <i>P. xizii</i>                                | CAGTACAAATG | CCGATGCGAG | GCTGATGGCT | GAATTTGAGC | AGTCCGGTAA | GTC TGGTAAG |
| <i>P. yangchunensis</i>                        | CAGTACAAATG | CCGATGCGAG | GCTGATGGCT | GAATTTGAGC | AGTCCGGTAA | GTC TGGTAAG |
| <i>P. yongxingensis</i>                        | CAGTACAAATG | CCGACGCGAG | GCTGATGGCT | GAATTTGAGC | AGTCCGGTAA | GTC TGGTAAG |
| <i>P. yunghuensis</i>                          | CAGTACAAATG | CCGATGCGAG | GCTGATGGCT | GAATTTGAGC | AGTCCGGTAA | GTC TGGTAAG |
| <i>P. cordifolia</i>                           | CAGTACAAATG | CCGATGCGAG | GCTGATGGCT | GAATTTGAGC | AGTCCGGTAA | GTC TGGTAAG |
| <i>P. danxiaensis</i>                          | CAGTACAAATG | CCGATGCGAG | GCTGATGGCT | GAATTTGAGC | AGTCCGGTAA | GTC TGGTAAG |
| <i>P. leiophylla</i> & <i>P. napoensis</i>     | CAGTACAAATG | CCGATGCGAG | GCTGATGGCT | GAATTTGAGC | AGTCCGGTAA | GTC TGGTAAG |
| <i>P. verecunda</i>                            | CAATACAAATG | CCGATGCGAG | GCTGATGGCT | GAATTTGAGC | AGTCCGGTAA | GTC TGGTAAG |
| <i>sp. nov. 6</i>                              | CAGTACAAATG | CCGATGCGAG | GCTGATGGCT | GAATTTGAGC | AGTCCGGTAA | GTC TGGTAAG |
| <i>sp. nov. 8</i>                              | CAGTACAAATG | CCGATGCGAG | GCTGATGGCT | GAATTTGAGC | AGTCCGGTAA | GTC TGGTAAG |
| <i>sp. nov. 9</i>                              | CAGTACAAATG | CCGATGCGAG | GCTGATGGCT | GAATTTGAGC | AGTCCGGTAA | GTC TGGTAAG |
| <i>sp. nov. 10</i>                             | CAGTACAAATG | CCGATGCGAG | GCTGATGGCT | GAATTTGAGC | AGTCCGGTAA | GTC TGGTAAG |
| <i>sp. nov. 12</i>                             | CAGTACAAATG | CCGATGCGAG | GCTGATGGCT | GAATTTGAGG | AGTCCGGTAA | GTC TGGTAAG |
| <i>sp. nov. 13</i>                             | CAGTACAAATG | CCGATGCGAG | GCTGATGGCT | GAATTTGAGC | AGTCCGGTAA | GTC TGGTAAG |
| <i>sp. nov. 16</i>                             | CAGTACAAATG | CCGATGCGAG | GCTGATGGCT | GAATTTGAGC | AGTCCGGTAA | GTC TGGTAAG |
| <i>sp. nov. 18</i>                             | CAGTACAAATG | CCGATGCGAG | GCTGATGGCT | GAATTTGAGC | AGTCCGGTAA | GTC TGGTAAG |
| <i>sp. nov. 19</i>                             | CAGTACAAATG | CCGATGCGAG | GCTGATGGCT | GAATTTGAGC | AGTCCGGTAA | GTC TGGTAAG |
| <i>Didymocarpus hancei</i>                     | CAGTACAAATG | CCGATGCGAG | GCTGATGGCT | GAATTTGAGC | AGTCCGGTAA | GTC TGGTAAG |
| <i>Petrocodon dealbatus</i>                    | CAGTACAAATG | CCGATGCGAG | GCTGATGGCT | GAATTTGAGC | AGTCCGGTAA | GTC TGGTAAG |

|                                                | 70         | 80         | 90         | 100        | 110        | 120        |
|------------------------------------------------|------------|------------|------------|------------|------------|------------|
| <i>P. bicolor</i>                              | TTCTTTAACT | ACTCAAAGTC | AGTTTCTCAT | GCTCCGAATA | CTTTGAGCAC | TGAGGAGGAG |
| <i>P. bipinnatifida</i>                        | TTCTTTAACT | ACTCAAAGTC | AGTTTCTCAT | GCTCTGAATA | CTTTGAGCAC | TGAGGAGGAG |
| <i>P. chizhouensis</i>                         | TTCTTTAACT | ACTCAAAGTC | AGTTTCTCAT | GCTCCGAATA | CTTTGAGCAC | TGAGGAGGAG |
| <i>P. cordata</i>                              | TTCTTTAACT | ACTCAAAGTC | AGTTTCTCAT | GCTCCGAATA | CTTTGAGCAC | TGAGGAGGAG |
| <i>P. depressa</i>                             | TTCTTTAACT | ACTCAAAGTC | AGTTTCTCAT | GCTCCGAATA | CTTTGAGCAC | TGAGGAGGAG |
| <i>P. dongguanica</i>                          | TTCTTTAACT | ACGCAAAGTC | AGTTTCTCAT | GCTCCGAATA | CTTTGAGCAC | TGAGGAGGAG |
| <i>P. eburnea</i>                              | TTCTTTAACT | ACTCAAAGTC | AGTTTCTCAT | GCTCCGAATA | CTTTGAGCAC | TGAGGAGGAG |
| <i>P. fimbrisejala</i>                         | TTCTTTAACT | ACTCAAAGTC | AGTTTCTCAT | GCTCCGAATA | CTTTGAGCAC | TGAGGAGGAG |
| <i>P. glandulosa</i> var. <i>yangshuoensis</i> | TTCTTTAACT | ACTCAAAGTC | AGTTTCTCAT | GCTCCGAATA | CTTTGAGCAC | TGAGGAGGAG |
| <i>P. guelinensis</i> var. <i>brachycar</i>    | TTCTTTAACT | ACTCAAAGTC | AGTTTCTCAT | GCTCCGAATA | CTTTGAGCAC | TGAGGAGGAG |
| <i>P. guihaiensis</i>                          | TTCTTTAACT | ACTCAAAGTC | AGTTTCTCAT | GCTCCGAATA | CTTTGAGCAC | TGAGGAGGAG |
| <i>P. heterotricha</i> & <i>P. pterippoda</i>  | TTCTTTAACT | ACTCAAAGTC | AGTTTCTCAT | GCTCCGAATA | CTTTGAGCAC | TGAGGAGGAG |
| <i>P. hochiensis</i>                           | TTCTTTAACT | ACTCAAAGTC | AGTTTCTCAT | GCTCCGAATA | CTTTGAGCAC | TGAGGAGGAG |
| <i>P. huaijiensis</i>                          | TTCTTTAACT | ACTCAAAGTC | AGTTTCTCAT | GCTCCGAATA | CTTTGAGCAC | TGAGGAGGAG |
| <i>P. langshanica</i>                          | TTCTTTAACT | ACTCAAAGTC | AGTTTCTCAT | GCTCCGAATA | CTTTGAGCAC | TGAGGAGGAG |
| <i>P. latnervis</i>                            | TTCTTTAACT | ACTCAAAGTC | AGTTTCTCAT | GCTCCGAATA | CTTTGAGCAC | TGAGGAGGAG |
| <i>P. laxiflora</i>                            | TTCTTTAACT | ACTCAAAGTC | AGTTTCTCAT | GCTCCGAATA | CTTTGAGCAC | TGAGGAGGAG |
| <i>P. leprosa</i>                              | TTCTTTAACT | ACTCAAAGTC | AGTTTCTCAT | GCTCCGAATA | CTTTGAGCAC | TGAGGAGGAG |
| <i>P. liguliformis</i>                         | TTCTTTAACT | ACTCAAAGTC | AGTTTCTCAT | GCTCCGAATA | CTTTGAGCAC | CGAGGAGGAG |
| <i>P. lijiangensis</i>                         | TTCTTTAACT | ACTCAAAGTC | AGTTTCTCAT | GCTCCGAATA | CTTTGAGCAC | TGAGGAGGAG |
| <i>P. linearifolia</i>                         | TTCTTTAACT | ACTCGAAGTC | AGTTTCTCAT | GCTCCGAATA | CTTTGAGCAC | TGAGGAGGAG |
| <i>P. lobulata</i>                             | TTCTTTAACT | ACTCAAAGTC | AGTTTCTCAT | GCTCCGAATA | CTTTGAGCAC | TGAGGAGGAG |
| <i>P. longii</i>                               | TTCTTTAACT | ACTCAAAGTC | AGTTTCTCAT | GCTCCGAATA | CTTTGAGCAC | TGAGGAGGAG |
| <i>P. lunglinensis</i>                         | TTCTTTAACT | ACTCAAAGTC | AGTTTCTCAT | GCTCCGAATA | CTTTGAGCAC | TGAGGAGGAG |
| <i>P. lungzhouensis</i>                        | TTCTTTAACT | ACTCGAAGTC | AGTTTCTCAT | GCTCCGAATA | CTTTGAGCAC | TGAGGAGGAG |
| <i>P. luochengensis</i>                        | TTCTTTAACT | ACTCGAAGTC | AGTTTCTCAT | GCTCCGAATA | CTTTGAGCAC | TGAGGAGGAG |
| <i>P. lutea</i>                                | TTCTTTAACT | ACTCAAAGTC | AGTTTCTCAT | GCTCCGAATA | CTTTGAGCAC | TGAGGAGGAG |
| <i>P. mabaensis</i>                            | TTCTTTAACT | ACTCAAAGTC | AGTTTCTCAT | GCTCCGAATA | CTTTGAGCAC | TGAGGAGGAG |
| <i>P. macrodonta</i>                           | TTCTTTAACT | ACTCAAAGTC | AGTTTCTCGT | GCTCCGAATA | CTTTGAGAAC | TGAGGAGGAG |
| <i>P. medica</i>                               | TTCTTTAACT | ACTCAAAGTC | AGTTTCTCAT | GCTCCGAATA | CTTTGAGCAC | TGAGGAGGAG |
| <i>P. moii</i>                                 | TTCTTTAACT | ACTCAAAGTC | AGTTTCTCAT | GCTCCGAATA | CTTTGAGCAC | TGAGGAGGAG |
| <i>P. mollifolia</i>                           | TTCTTTAACT | ACTCAAAGTC | AGTTTCTCGT | GCTCCGAATA | CTTTGAGCAC | CGAGGAGGAG |
| <i>P. obtusidentata</i>                        | TTCTTTAACT | ACTCAAAGTC | AGTTTCTCAT | GCTCCGAATA | CTTTGAGCAC | TGAGGAGGAG |
| <i>P. orthandra</i>                            | TTCTTTAACT | ACTCGAAGTC | AGTTTCTCAT | GCTCCGAATA | CTTTGAGCAC | TGAGGAGGAG |
| <i>P. parvifolia</i>                           | TTCTTTAACT | ACTCAAAGTC | AGTTTCTCAT | GCTCCGAATA | CTTTGAGCAC | TGAGGAGGAG |
| <i>P. pinnatifida</i>                          | TTCTTTAACT | ACTCAAAGTC | AGTTTCTCAT | GCTCCGAATA | CTTTGAGCAC | TGAGGAGGAG |
| <i>P. pulchurifolia</i>                        | TTCTTTAACT | ACTCAAAGTC | AGTTTCTCAT | GCTCCGAATA | CTTTGAGCAC | TGAGGAGGAG |
| <i>P. renifolia</i>                            | TTCTTTAACT | ACTCAAAGTC | AGTTTCTCAT | GCTCCGAATA | CTTTGAGCAC | CGAGGAGGAG |
| <i>P. repanda</i>                              | TTCTTTAACT | ACTCAAAGTC | AGTTTCTCAT | GCTCCGAATA | CTTTGAGCAC | TGAGGAGGAG |
| <i>P. ronganensis</i>                          | TTCTTTAACT | ACTCAAAGTC | AGTTTCTCGT | GCTCCGAATA | CTTTGAGCAC | CGAGGAGGAG |
| <i>P. sclerophylla</i>                         | TTCTTTAACT | ACTCAAAGTC | AGTTTCTCAT | GCTCCGAATA | CTTTGAGCAC | CGAGGAGGAG |
| <i>P. sinensis</i>                             | TTCTTTAACT | ACTCTAAGTC | AGTTTCTCAT | GCTCCGAATA | CTTTGAGCAC | TGAGGAGGAG |
| <i>P. spinulosa</i>                            | TTCTTTAACT | ACTCAAAGTC | AGTTTCTCAT | GCTCCGAATA | CTTTGAGCAC | TGAGGAGGAG |
| <i>P. subrhomboidea</i>                        | TTCTTTAACT | ACTCAAAGTC | AGTTTCTCAT | GCTCCGAATA | CTTTGAGCAC | TGAGGAGGAG |
| <i>P. subrhomboidea</i> var. <i>tribract</i>   | TTCTTTAACT | ACTCAAAGTC | AGTTTCTCAT | GCTCCGAATA | CTTTGAGCAC | TGAGGAGGAG |
| <i>P. subulata</i>                             | TTCTTTAACT | ACTCAAAGTC | AGTTTCTCAT | GCTCCGAATA | CTTTGAGCAC | TGAGGAGGAG |
| <i>P. swinglei</i>                             | TTCTTTAACT | ACTCGAAGTC | AGTTTCTCAT | GCTCCGAATA | CTTTGAGCAC | TGAGGAGGAG |
| <i>P. tabacum</i>                              | TTCTTTAACT | ACTCAAAGTC | AGTTTCTCAT | GCTCCGAATA | CTTTGAGCAC | TGAGGAGGAG |
| <i>P. tenuifolia</i>                           | TTCTTTAACT | ACTCAAAGTC | AGTTTCTCAT | GCTCCGAATA | CTTTGAGCAC | TGAGGAGGAG |
| <i>P. tenuituba</i>                            | TTCTTTAACT | ACTCAAAGTC | AGTTTCTCAT | GCTCCGAATA | CTTTGAGCAC | TGAGGAGGAG |
| <i>P. tiandengensis</i>                        | TTCTTTAACT | ACTCAAAGTC | AGTTTCTCAT | GCTCCGAATA | CTTTGAGCAC | CGAGGAGGAG |
| <i>P. tribracteata</i>                         | TTCTTTAACT | ACTCAAAGTC | AGTTTCTCAT | GCTCCGAATA | CTTTGAGCAC | CGAGGAGGAG |
| <i>P. villosissima</i>                         | TTCTTTAACT | ACTCAAAGTC | AGTTTCTCAT | GCTCCGAATA | CTTTGAGCAC | TGAGGAGGAG |
| <i>P. wentsaii</i>                             | TTCTTTAACT | ACTCAAAGTC | AGTTTCTCAT | GCTCCGAATA | CTTTGAGCAC | TGAGGAGGAG |
| <i>P. xiuningensis</i>                         | TTCTTTAACT | ACTCAAAGTC | AGTTTCTCAT | GCTCCGAATA | CTTTGAGCAC | TGAGGAGGAG |
| <i>P. xizii</i>                                | TTCTTTAACT | ACTCAAAGTC | AGTTTCTCAT | GCTCCGAATA | CTTTGAGCAC | TGAGGAGGAG |
| <i>P. yangchunensis</i>                        | TTCTTTAACT | ACTCGAAGTC | AGTTTCTCAT | GCTCCGAATA | CTTTGAGCAC | TGAGGAGGAG |
| <i>P. yongxingensis</i>                        | TTCTTTAACT | ACTCAAAGTC | AGTTTCTCAT | GCTCCGAATA | CTTTGAGCAC | TGAGGAGGAG |
| <i>P. yunghuensis</i>                          | TTCTTTAACT | ACTCAAAGTC | AGTTTCTCAT | GCTCCGAATA | CTTTGAGCAC | TGAGGAGGAG |
| <i>P. cordifolia</i>                           | TTCTTTAACT | ACTCAAAGTC | AGTTTCTCAT | GCTCCGAATA | CTTTGAGCAC | TGAGGAGGAG |
| <i>P. danxiaensis</i>                          | TTCTTTAACT | ACTCAATGTC | AGTTTCTCAT | GCTCCGAATA | CTTTGAGCAC | TGAGGAGGAG |
| <i>P. leiophylla</i> & <i>P. napoensis</i>     | TTCTTTAACT | ACTCAAAGTC | AGTTTCTCGT | GCTCCGAATA | CTTTGAGCAC | CGAGGAGGAG |
| <i>P. verecunda</i>                            | TTCTTTAACT | ACTCAAAGTC | AGTTTCTCAT | GCTCCGAATA | CTTTGAGCAC | TGAGGAGGAG |
| <i>sp. nov. 6</i>                              | TTCTTTAACT | ACTCAAAGTC | AGTTTCTCAT | GCTCCGAATA | CTTTGAGCAC | TGAGGAGGAG |
| <i>sp. nov. 8</i>                              | TTCTTTAACT | ACTCAAAGTC | AGTTTCTCAT | GCTCCGAATA | CTTTGAGCAC | TGAGGAGGAG |
| <i>sp. nov. 9</i>                              | TTCTTTAACT | ACTCAAAGTC | AGTTTCTCAT | GCTCCGAATA | CTTTGAGCAC | TGAGGAGGAG |
| <i>sp. nov. 10</i>                             | TTCTTTAACT | ACTCAAAGTC | AGTTTCTCAT | GCTCCGAATA | CTTTGAGCAC | TGAGGAGGAG |
| <i>sp. nov. 12</i>                             | TTCTTTAACT | ACTCAAAGTC | AGTTTCTCAT | GCTCCGAATA | CTTTGAGCAC | TGAGGAGGAG |
| <i>sp. nov. 13</i>                             | TTCTTTAACT | ACTCAAAGTC | AGTTTCTCAT | GCTCCGAATA | CTTTGAGCAC | TGAGGAGGAG |
| <i>sp. nov. 16</i>                             | TTCTTTAACT | ACTCAAAGTC | AGTTTCTCAT | GCTCCGAATA | CTTTGAGCAC | TGAGGAGGAG |
| <i>sp. nov. 18</i>                             | TTCTTTAACT | ACTCAAAGTC | AGTTTCTCAT | GCTCCGAATA | CTTTGAGCAC | TGAGGAGGAG |
| <i>sp. nov. 19</i>                             | TTCTTTAACT | ACTCTAAGTC | AGTTTCTCAT | GCTCCGAATA | CTTTGAGCAC | TGAGGAGGAG |
| <i>Didymocarpus hancei</i>                     | TTCTTTAACT | ACTCAAAGTC | AGTTTCTCAT | GCTCCGAATA | CTTTGAGCAC | CGAGGAGGAG |
| <i>Petrocodon dealbatus</i>                    | TTCTTTAACT | ACTCAAAGTC | AGTTTCTCAT | GCTCCGAATA | CTTTGAGCAC | TGAGGAGGAG |

|                                                | 130        | 140         | 150        | 160        | 170         | 180        |
|------------------------------------------------|------------|-------------|------------|------------|-------------|------------|
| <i>P. bicolor</i>                              | ATGACTGCTT | ATTTGTTCGAA | AATCCAGAGG | GGGAGTCTTG | TGCAGGCCCTT | TGGTTGTATG |
| <i>P. bipinnatifida</i>                        | ATGACTGCTT | ATTTGTTCGAA | AATCCAGAGG | GGGAGTCTTG | TGCAGGCCCTT | TGGTTGTATG |
| <i>P. chizhouensis</i>                         | ATGACTGCTT | ATTTGTTCGAA | AATCCAGAGG | GGGAGTCTTG | TGCAGGCCCTT | TGGTTGTATG |
| <i>P. cordata</i>                              | ATGACTGCTT | ATTTGTTCGAA | AATCCAGAGG | GGGAGTCTTG | TGCAGGCCCTT | TGGTTGTATG |
| <i>P. depressa</i>                             | ATGACTGCTT | ATTTGTTCGAA | AATCCAGAGG | GGGAGTCTTG | TGCAGGCCCTT | TGGTTGTATG |
| <i>P. dongguanica</i>                          | ATGATTGCTT | ATTTGTTCGAA | AATCCAGAGG | GGGAGTCTTG | TGCAGGCCCTT | TGGTTGTATG |
| <i>P. eburnea</i>                              | ATGACTGCTT | ATTTATTCGAA | AATCCAGAGG | GGGAGTCTTG | TGCAGGCCCTT | TGGTTGTATG |
| <i>P. fimbrisejala</i>                         | ATGATTGCTT | ATTTGTTCGAA | AATCCAGAGG | GGGAGTCTTG | TGCAGGCCCTT | TGGTTGTATG |
| <i>P. glandulosa</i> var. <i>yangshuoensis</i> | ATGACTGCTT | ATTTGTTCGAA | AATCCAGAGG | GGGAGTCTTG | TGCAGGCCCTT | TGGTTGTATG |
| <i>P. guelinensis</i> var. <i>brachycar</i>    | ATGACTGCTT | ATTTGTTCGAA | AATCCAGAGG | GGGAGTCTTG | TGCAGGCCCTT | TGGTTGTATG |
| <i>P. guihaiensis</i>                          | ATGACTGCTT | ATTTGTTCGAA | AATCCAGAGG | GGGAGTCTTG | TGCAGGCCCTT | TGGTTGTATG |
| <i>P. heterotricha</i> & <i>P. pterippoda</i>  | ATGACTGCTT | ATTTGTTCGAA | AATCCAGAGG | GGGAGTCTTG | TGCAGGCCCTT | TGGTTGTATG |
| <i>P. hochiensis</i>                           | ATGATTGCTT | ATTTGTTCGAA | AATCCAGAGG | GGGAGTCTTG | TGCAGGCCCTT | TGGTTGTATG |
| <i>P. huaijiensis</i>                          | ATGACTGCTT | ATTTGTTCGAA | AATCCAGAGG | GGGAGTCTTG | TGCAGGCCCTT | TGGTTGTATG |
| <i>P. langshanica</i>                          | ATGACTGCTT | ATCTGTTCGAA | AATCCAGAGG | GGGAGTCTTG | TGCAGGCCCTT | TGGTTGTATG |
| <i>P. latinervis</i>                           | ATGACTGCTT | ATCTGTTCGAA | AATCCAGAGG | GGGAGTCTTG | TGCAGGCCCTT | TGGTTGTATG |
| <i>P. laxiflora</i>                            | ATGACTGCTT | ATTTGTTCGAA | AATCCAGAGG | GGGAGTCTTG | TGCAGGCCCTT | TGGTTGTATG |
| <i>P. leprosa</i>                              | ATGACTGCTT | ATTTGTTCGAA | AATCCAAAGG | GGGAGTCTTG | TGCAGGCCCTT | CGGTTGTATG |
| <i>P. liguliformis</i>                         | ATGACTGCTT | ATTTGTTCGAA | AATCCAGAGG | GGGAGTCTTG | TGCAGGCCCTT | TGGTTGTATG |
| <i>P. lijiangensis</i>                         | ATGACTGCTT | ATTTGTTCGAA | AATCCAGAGG | GGGAGTCTTG | TGCAGGCCCTT | TGGTTGTATG |
| <i>P. linearifolia</i>                         | ATGACTGCTT | ATTTGTTCGAA | AATCCAGAGG | GGGAGTCTTG | TGCAGGCCCTT | TGGTTGTATG |
| <i>P. lobulata</i>                             | ATGACTGCTT | ATTTGTTCGAA | AATCCAGAGG | GGGAGTCTTG | TGCAGGCCCTT | TGGTTGTATG |
| <i>P. longii</i>                               | ATGACTGCTT | ATTTGTTCGAA | AATCCAGAGG | GGGAGTCTTG | TGCAGGCCCTT | TGGTTGTATG |
| <i>P. lunglinensis</i>                         | ATGACTGCTT | ATTTGTTCGAA | AATCCAGAGG | GGGAGTCTTG | TGCAGGCCCTT | TGGTTGTATG |
| <i>P. lungzhouensis</i>                        | ATGACTGCTT | ATTTGTTCGAA | AATCCAGAGG | GGGAGTCTTG | TGCAGGCCCTT | TGGTTGTATG |
| <i>P. luochengensis</i>                        | ATGACTGCTT | ATTTGTTCGAA | AATCCAGAGG | GGGAGTCTTG | TGCAGGCCCTT | TGGTTGTATG |
| <i>P. lutea</i>                                | ATGACTGCTT | ATTTGTTCGAA | AATCCAGAGG | GGGAGTCTTG | TGCAGGCCCTT | TGGTTGTATG |
| <i>P. mabaensis</i>                            | ATGACTGCTT | ATTTGTTCGAA | AATCCAGAGG | GGGAGTCTTG | TGCAGGCCCTT | TGGTTGTATG |
| <i>P. macrodonta</i>                           | ATGACTGCTT | ATTTGTTCGAA | AATCCAGAGG | GGGAGTCTTG | TGCAGGCCCTT | TGGTTGTATG |
| <i>P. medica</i>                               | ATGACTGCTT | ATTTGTTCGAA | AATCCAGAGG | GGGAGTCTTG | TGCAGGCCCTT | TGGTTGTATG |
| <i>P. moi</i>                                  | ATGACTGCTT | ATTTGTTCGAA | AATCCAGAGG | GGGAGTCTTG | TGCAGGCCCTT | TGGTTGTATG |
| <i>P. mollifolia</i>                           | ATGACTGCTT | ATTTGTTCGAA | AATCCAGAGG | GGGAGTCTTG | TGCAGGCCCTT | TGGTTGTATG |
| <i>P. obtusidentata</i>                        | ATGACTGCTT | ATTTGTTCGAA | AATCCAGAGG | GGGAGTCTTG | TGCAGGCCCTT | TGGTTGTATG |
| <i>P. orthandra</i>                            | ATGACTGCTT | ATTTGTTCGAA | AATCCAGAGG | GGGAGTCTTG | TGCAGGCCCTT | TGGTTGTATG |
| <i>P. parvifolia</i>                           | ATGACTGCTT | ATTTGTTCGAA | AATCCAGAGG | GGGAGTCTTG | TGCAGGCCCTT | TGGTTGTATG |
| <i>P. pinnatifida</i>                          | ATGACTGCTT | ATTTGTTCGAA | AATCCAGAGG | GGGAGTCTTG | TGCAGGCCCTT | TGGTTGTATG |
| <i>P. pulchurifolia</i>                        | ATGACTGCTT | ATTTGTTCGAA | AATCCAGAGG | GGGAGTCTTG | TGCAGGCCCTT | TGGTTGTATG |
| <i>P. renifolia</i>                            | ATGACTGCTT | ATTTGTTCGAA | AATCCAGAGG | GGGAGTCTTG | TGCAGGCCCTT | TGGTTGTATG |
| <i>P. repanda</i>                              | ATGACTGCTT | ATTTGTTCGAA | AATCCAGAGG | GGGAGTCTTG | TGCAGGCCCTT | TGGTTGTATG |
| <i>P. ronganensis</i>                          | ATGACTGCTT | ATTTGTTCGAA | AATCCAGAGG | GGGAGTCTTG | TGCAGGCCCTT | TGGTTGTATG |
| <i>P. sclerophylla</i>                         | ATGACTGCTT | ATTTGTTCGAA | AATCCAGAGG | GGGAGTCTTG | TGCAGGCCCTT | TGGTTGTATG |
| <i>P. sinensis</i>                             | ATGACTGCTT | ATTTGTTCGAA | AATCCAGAGG | GGGAGTCTTG | TGCAGGCCCTT | TGGTTGTATG |
| <i>P. spinulosa</i>                            | ATGACTGCTT | ATTTGTTCGAA | AATCCAGAGG | GGGAGTCTTG | TGCAGGCCCTT | TGGTTGTATG |
| <i>P. subrhomboidea</i>                        | ATGACTGCTT | ATTTGTTCGAA | AATCCAGAGG | GGGAGTCTTG | TGCAGGCCCTT | TGGTTGTATG |
| <i>P. subrhomboidea</i> var. <i>tribract</i>   | ATGACTGCTT | ATTTGTTCGAA | AATCCAGAGG | GGGAGTCTTG | TGCAGGCCCTT | TGGTTGTATG |
| <i>P. subulata</i>                             | ATGACTGCTT | ATTTGTTCGAA | AATCCAGAGG | GGGAGTCTTG | TGCAGGCCCTT | TGGTTGTATG |
| <i>P. swinglei</i>                             | ATGACTGCTT | ATTTGTTCGAA | AATCCAGAGG | GGGAGTCTTG | TGCAGGCCCTT | TGGTTGTATG |
| <i>P. tabacum</i>                              | ATGACTGCTT | ATTTGTTCGAA | AATCCAGAGG | GGGAGTCTTG | TGCAGGCCCTT | TGGTTGTATG |
| <i>P. tenuifolia</i>                           | ATGACTGCTT | ATTTGTTCGAA | AATCCAGAGG | GGGAGTCTTG | TGCAGGCCCTT | TGGTTGTATG |
| <i>P. tenuituba</i>                            | ATGACTGCTT | ATTTGTTCGAA | AATCCAGAGG | GGGAGTCTTG | TGCAGGCCCTT | TGGTTGTATG |
| <i>P. tiandengensis</i>                        | ATGACTGCTT | ATTTGTTCGAA | AATCCAGAGG | GGGAGTCTTG | TGCAGGCCCTT | TGGTTGTATG |
| <i>P. tribracteata</i>                         | ATGACTGCTT | ATTTGTTCGAA | AATCCAGAGG | GGGAGTCTTG | TGCAGGCCCTT | TGGTTGTATG |
| <i>P. villosissima</i>                         | ATGATTGCTT | ATTTGTTCGAA | AATCCAGAGG | GGGAGTCTTG | TGCAGGCCCTT | TGGTTGTATG |
| <i>P. wentsaii</i>                             | ATGACTGCTT | ATTTGTTCGAA | AATCCAGAGG | GGGAGTCTTG | TGCAGGCCCTT | TGGTTGTATG |
| <i>P. xiuningensis</i>                         | ATGACTGCTT | ATTTGTTCGAA | AATCCAGAGG | GGGAGTCTTG | TGCAGGCCCTT | TGGTTGTATG |
| <i>P. xizii</i>                                | ATGACTGCTT | ATTTGTTCGAA | AATCCAGAGG | GGGAGTCTTG | TGCAGGCCCTT | TGGTTGTATG |
| <i>P. yangchunensis</i>                        | ATGACTGCTT | ATTTGTTCGAA | AATCCAGAGG | GGGAGTCTTG | TGCAGGCCCTT | TGGTTGTATG |
| <i>P. yongxingensis</i>                        | ATGACTGCTT | ATTTGTTCGAA | AATCCAGAGG | GGGAGTCTTG | TGCAGGCCCTT | TGGTTGTATG |
| <i>P. yunghuensis</i>                          | ATGACTGCTT | ATTTGTTCGAA | AATCCAGAGG | GGGAGTCTTG | TGCAGGCCCTT | TGGTTGTATG |
| <i>P. cordifolia</i>                           | ATGACTGCTT | ATTTGTTCGAA | AATCCAGAGG | GGGAGTCTTG | TGCAGGCCCTT | TGGTTGTATG |
| <i>P. danxiaensis</i>                          | ATGACTGCTT | ATTTGTTCGAA | AATCCAGAGG | GGGAGTCTTG | TGCAGGCCCTT | TGGTTGTATG |
| <i>P. leiophylla</i> & <i>P. napoensis</i>     | ATGACTGCTT | ATTTGTTCGAA | AATCCAGAGG | GGGAGTCTTG | TGCAGGCCCTT | TGGTTGTATG |
| <i>P. verecunda</i>                            | ATGACTGCTT | ATTTGTTCGAA | AATCCAGAGG | GGGAGTCTTG | TGCAGGCCCTT | TGGTTGTATG |
| <i>sp. nov. 6</i>                              | ATGACTGCTT | ATTTGTTCGAA | AATCCAGAGG | GGGAGTCTTG | TGCAGGCCCTT | TGGTTGTATG |
| <i>sp. nov. 8</i>                              | ATGACTGCTT | ATTTGTTCGAA | AATCCAGAGG | GGGAGTCTTG | TGCAGGCCCTT | TGGTTGTATG |
| <i>sp. nov. 9</i>                              | ATGACTGCTT | ATTTGTTCGAA | AATCCAGAGG | GGGAGTCTTG | TGCAGGCCCTT | TGGTTGTATG |
| <i>sp. nov. 10</i>                             | ATGACTGCTT | ATTTGTTCGAA | AATCCAGAGG | GGGAGTCTTG | TGCAGGCCCTT | TGGTTGTATG |
| <i>sp. nov. 12</i>                             | ATGACTGCTT | ATTTGTTCGAA | AATCCAGAGG | GGGAGTCTTG | TGCAGGCCCTT | TGGTTGTATG |
| <i>sp. nov. 13</i>                             | ATGACTGCTT | ATTTGTTCGAA | AATCCAGAGG | GGGAGTCTTG | TGCAGGCCCTT | TGGTTGTATG |
| <i>sp. nov. 16</i>                             | ATGACTGCTT | ATTTGTTCGAA | AATCCAAAGG | GGGAGTCTTG | TGCAGGCCCTT | TGGTTGTATG |
| <i>sp. nov. 18</i>                             | ATGATTGCTT | ATTTGTTCGAA | AATCCAGAGG | GGGAGTCTTG | TGCAGGCCCTT | TGGTTGTATG |
| <i>sp. nov. 19</i>                             | ATGACTGCTT | ATTTGTTCGAA | AATCCAGAGG | GGGAGTCTTG | TGCAGGCCCTT | TGGTTGTATG |
| <i>Didymocarpus hancei</i>                     | ATGACTGCTT | ATTTGTTCGAA | AATCCAGAGG | GGGAGTCTTG | TGCAGGCCCTT | TGGTTGTATG |
| <i>Petrocodon dealbatus</i>                    | ATGACTGCTT | ATTTGTTCGAA | AATCCAGAGG | GGGAGTCTTG | TGCAGGCCCTT | TGGTTGTATG |



|                                            | 250         | 260         | 270        | 280        | 290        | 300        |
|--------------------------------------------|-------------|-------------|------------|------------|------------|------------|
| <i>P. bicolor</i>                          | CTGGGCTTTGA | AGAGTGTCTG  | CGAGCCAAAA | AAATTGATGG | GTCTTATTGG | GGTTGATGCA |
| <i>P. bipinnatifida</i>                    | CTGGGCTTTGA | AGAGCGTCTG  | TGAGCCAAAA | AAATTGATGG | GTCTTATTGG | GGTTGATGCA |
| <i>P. chizhouensis</i>                     | CTGGGCTTTGA | AGAGTGTCTG  | TGAGCCAAAA | AAATTGATGG | GTCTTATTGG | GGTTGATGCA |
| <i>P. cordata</i>                          | CTGGGCTTTGA | AGAGCGTCTG  | TGAGCCAAAA | AAATTGATGG | GTCTTATTGG | GGTTGATGCA |
| <i>P. depressa</i>                         | CTGGGCTTTGA | AGAGTGTCTG  | TGATCCAAAA | AAATTGATGG | GTCTTATTGG | GGTTGATGCA |
| <i>P. dongguanica</i>                      | CTGGGCTTTGA | AGAGCGTCTG  | TGAGCCAAAA | AAATGGATGG | GTCTTATTGG | GGTTGATGCA |
| <i>P. eburnea</i>                          | CTGGGCTTTGA | AAAGGGTCTG  | GGAGCCAAAA | AAATTGATGG | GTCTTATTGG | GGTTGATGCA |
| <i>P. fimbrispala</i>                      | CTGGGCTTTGA | AGAGCGTCTG  | CGAACCAAAA | AAATTGATGG | GTCTTATTGG | GGTTGATGCA |
| <i>P. glandulosa var. yangshuoensis</i>    | CTGGGCTTTGA | AGAGTGTCTG  | TGAGCCAAAA | AAATGGATGG | GTCTTATTGG | GGTTGATGCA |
| <i>P. guelinensis var. brachycar</i>       | CTGGGGTTTGA | AGAGTGTCTG  | TGAGCCAAAA | AAATTGATGG | GTCTTATTGG | GGTTGATGCA |
| <i>P. guihaiensis</i>                      | CTGGGCTTTGA | AGAGCGTCTG  | TGAGCCAAAA | AAATTGATGG | GTCTTATTGG | GGTTGATGCA |
| <i>P. heterotricha &amp; P. pterippoda</i> | CTGGGCTTTGA | AGAGTGTCTG  | TGAGCCAAAA | AAATTGATGG | GTCTTATTGG | GGTTGATGCA |
| <i>P. hochiensis</i>                       | CTGGGCTTTGA | AGAGTGTCTG  | TGAGCCAAAA | AAATTGATGG | GTCTTATTGG | GGTTGATGCA |
| <i>P. huaijiensis</i>                      | CTGGGCTTTGA | AGAGCGTCTG  | TGAGCCAAAA | AAATTGATGG | GTCTTATTGG | GGTTGATGCA |
| <i>P. langshanica</i>                      | CTGGGCTTTGA | AGAGTGTCTG  | TGAGCCAAAA | AAATTGATGG | GTCTTATTGG | GGTTGATGCA |
| <i>P. latinervis</i>                       | CTGGGCTTTGA | AGAGTGTCTG  | TGAGCCAAAA | AAATGATGG  | GTCTTATTGG | GGTTGATGCA |
| <i>P. laxiflora</i>                        | CTGGGCTTTGA | AGAGTGTCTG  | TGAGCCAAAA | AAATTGATGG | GTCTTATTGG | GGTTGATGCA |
| <i>P. leprosa</i>                          | CTGGGCTTTGA | AGAGCGTCTG  | TGAGCCAAAA | AAATTGATGG | GTCTTATTGG | GGTTGATGCA |
| <i>P. liguliformis</i>                     | CTGGGCTTTGA | AGAGTGTCTG  | TGAGCCAAAA | AAATTGACGG | GTCTTATTGG | GGTTGATGCA |
| <i>P. lijiangensis</i>                     | CTGGGCTTTGA | AGAGCGTCTG  | TGAGCCAAAA | AAATTGATGG | GTCTTATTGG | GGTTGATGCA |
| <i>P. linearifolia</i>                     | CTGGGCTTTGA | AGAGTGTCTG  | TGAGCCAAAA | AAATTGATGG | GTCTTATTGG | GGTTGATGCA |
| <i>P. lobulata</i>                         | CTGGGCTTTGA | AGAGTGTCTG  | TGATCCAAAA | AAATTGATGG | GTCTTATTGG | GGTTGATGCA |
| <i>P. longii</i>                           | CTGGGCTTTGA | AGAGCGTCTG  | TGAGCCAAAA | AAATTGATGG | GTCTTATTGG | GGTTGATGCA |
| <i>P. lunglinensis</i>                     | CTGGGCTTTGA | AGAGCGTCTG  | TGAGCCAAAA | AAATTGGTGG | GTCTTATTGG | GGTTGATGCA |
| <i>P. lungzhouensis</i>                    | CTGGGCTTTGA | AGAGTTTGTG  | TGAGCCAAAA | AAATTGATGG | GTCTTATTGG | GGTTGATGCA |
| <i>P. luochengensis</i>                    | CTGGGCTTTGA | AGAGTGTCTG  | TGAGCCAAAA | AAATTGATGG | GTCTTATTGG | GGTTGATGCA |
| <i>P. lutea</i>                            | CTGGGCTTTGA | AGAGTGTCTG  | TGAGCCAAAA | AAATTGATGG | GTCTTATTGG | GGTTGATGCA |
| <i>P. mabaensis</i>                        | CTGGGCTTTGA | AGAGTGTCTG  | TGATCCAAAA | AAATTGATGG | GTCTTATTGG | GGTTGATGCA |
| <i>P. macrodonta</i>                       | CTGGGCTTTGA | AGAGTGTCTG  | TGAGCCAAAA | AAATTGCTGG | GTCTTATTGG | GGTTGATGCA |
| <i>P. medica</i>                           | CTGGGCTTTGA | AGAGCGTCTG  | TGAGCCAAAA | AAATTGATGG | GTCTTATTGG | GGTTGATGCA |
| <i>P. moii</i>                             | CTGGGCTTTGA | AGAAATGTCTG | TGAGCCAAAA | AAATTGATGG | GTCTTATTGG | GGTTGATGCA |
| <i>P. mollifolia</i>                       | CTGGGCTTTGA | AGAGTGTCTG  | TGAGCCAAAA | AAATTGACGG | GTCTTATTGG | GGTTGATGCA |
| <i>P. obtusidentata</i>                    | CTGGGCTTTGA | AGAGCGTCTG  | TGAGCCAAAA | AAATTGATGG | GTCTTATTGG | AGTTGATGCA |
| <i>P. orthandra</i>                        | CTGGGCTTTGA | AGAGTGTCTG  | CGAGCCAAAA | AAATTGATGG | GTCTTATTGG | GGTTGATGCA |
| <i>P. parvifolia</i>                       | CTGGGCTTTGA | AGAGTGTCTG  | TGAGCCAAAA | AAATTGATGG | GTCTTATTGG | GGTTGATGCA |
| <i>P. pinnatifida</i>                      | CTGGGCTTTGA | AGAGCGTCTG  | TGAGCCAAAA | AAATTGATGG | GTCTTATTGG | GGTTGATGCA |
| <i>P. pulchurifolia</i>                    | CTGGGCTTTGA | AGAGTGTCTG  | TGAGCCAAAA | AAATTGATGG | GTCTTATTGG | GGTTGATGCA |
| <i>P. renifolia</i>                        | CTGGGCTTTGA | AGAGTGTCTG  | TGAGCCAAAA | AAATTGACGG | GTCTTATTGG | GGTTGATGCA |
| <i>P. repanda</i>                          | CTGGGCTTTGA | AGAGTGTCTG  | TGAGCCAAAA | AAATTGACGG | GTCTTATTGG | GGTTGATGCA |
| <i>P. ronganensis</i>                      | CTGGGCTTTGA | AGAGTGTCTG  | TGAGCCAAAA | AAATTGACGG | GTCTTATTGG | GGTTGATGCA |
| <i>P. sclerophylla</i>                     | CTGGGCTTTGA | AGAGTGTCTG  | TGAGCCAAAA | AAATTGACGG | GTCTTATTGG | GGTTGATGCA |
| <i>P. sinensis</i>                         | CTGGGCTTTGA | AGAGCGTCTG  | TGAGCCAAAA | AAATTGATGG | GTCTTATTGG | GGTTGATGCA |
| <i>P. spinulosa</i>                        | CTGGGCTTTGA | AGAGTGTCTG  | TGAGCCAAAA | AAATTGATGG | GTCTTATTGG | GGTTGATGCA |
| <i>P. subrhomboidea</i>                    | CTGGGCTTTGA | AGAGCGTCTG  | TGAGCCAAAA | AAATTGATGG | GTCTTATTGG | GGTTGATGCA |
| <i>P. subrhomboidea var. tribract</i>      | CTGGGCTTTGA | AGAGTGTCTG  | TGAGCCAAAA | AAATTGATGG | GTCTTATTGG | GGTTGATGCA |
| <i>P. subulata</i>                         | CTGGGCTTTGA | AGAGCGTCTG  | TGAGCCAAAA | AAATTGATGG | GACTTATTGG | GGTTGATGCA |
| <i>P. swinglei</i>                         | CTGGGCTTTGA | AGAGTGTCTG  | TGAGCCAAAA | AAATCGATGG | GTCTTATTGG | GGTTGATGCA |
| <i>P. tabacum</i>                          | CTGGGGTTTGA | AGAGTGTCTG  | TGAGCCAAAA | AAATTGATGG | GTCTTATTGG | GGTTGATGCA |
| <i>P. tenuifolia</i>                       | CTGGGCTTTGA | AGAGCGTCTG  | TGAGCCAAAA | AAATTGATGG | GTCTTATTGG | GGTTGATGCA |
| <i>P. tenuituba</i>                        | CTGGGCTTTGA | AGAGTGTCTG  | TGAGCCAAAA | AAATTGATGG | GTCTTATTGG | GGTTGATGCA |
| <i>P. tiandengensis</i>                    | CTGGGCTTTGA | AGAGTGTCTG  | GGAGCCAAAA | AAATTGACGG | GTCTTATTGG | GGTTGATGCA |
| <i>P. tribracteata</i>                     | CTGGGCTTTGA | AGAGTGTCTG  | TGAGCCAAAA | AAATTGACGG | GTCTTATTGG | GGTTGATGCA |
| <i>P. villosissima</i>                     | CTGGGCTTTGA | AGAGCGTCTG  | TGAGCCAAAA | AAATTGATGG | GTCTTATTGG | GGTTGATGCA |
| <i>P. wentsaii</i>                         | CTGGGCTTTGA | AGAGTGTCTG  | TGAGCCAAAA | AAATTGATGG | GTCTTATTGG | GGTTGATGCA |
| <i>P. xiuningensis</i>                     | CTGGGCTTTGA | AGAGTGTCTG  | TGATCCAAAA | AAATTATTGG | GTCTTATTGG | GGTTGATGCA |
| <i>P. xizii</i>                            | CTGGGCTTTGA | AGAGTGTCTG  | TGAGCCAAAA | AAATTGATGG | GTCTTATTGG | GGTTGATGCA |
| <i>P. yangchunensis</i>                    | CTGGGCTTTGA | AGAGCGTCTG  | TGAGCCAAAA | AAATTGATGG | GTCTTATTGG | GGTTGATGCA |
| <i>P. yongxingensis</i>                    | CTGGGCTTTGA | AGAGTGTCTG  | TGATCCAAAA | AAATTGATGG | GTCTTATTGG | GGTTGATGCA |
| <i>P. yunghuensis</i>                      | CTGGGCTTTGA | AGAGCGTCTG  | TGAGCCAAAA | AGATTGATGG | GTCTTATTGG | GGTTGATGCA |
| <i>P. cordifolia</i>                       | CTGGGCTTTGA | AGAGTGTCTG  | TGAGCCAAAA | AAATTCACGG | GTCTTATTGG | GGTTGATGCA |
| <i>P. danxiaensis</i>                      | CTGGGCTTTGA | AGAGTGTCTG  | TGATCCAAAA | AAATTGATGG | GTCTTATTGG | GGTTGATGCA |
| <i>P. leiophylla &amp; P. napoensis</i>    | CTGGGCTTTGA | AGAGTGTCTG  | TGAGCCAAAA | AAATTGACGG | GTCTTATTGG | GGTTGATGCA |
| <i>P. verecunda</i>                        | CTGGGCTTTGA | AGAGCGTCTG  | CGAGCCAAAA | AAATTGATGG | GTCTTATTGG | GGTTGATGCA |
| <i>sp. nov. 6</i>                          | CTGGGCTTTGA | AGAGCGTCTG  | TGAGCCAAAA | AAATTGATGG | GTCTTATTGG | GGTTGATGCA |
| <i>sp. nov. 8</i>                          | CTGGGCTTTGA | AGAGTGTCTG  | TGAGCCAAAA | AAATTGACGG | GTCTTATTGG | GGTTGATGCA |
| <i>sp. nov. 9</i>                          | CTGGGCTTTGA | AGAGTGTCTG  | TGAGCCAAAA | AAATTGATGG | GTCTTATTGG | GGTTGATGCA |
| <i>sp. nov. 10</i>                         | CTGGGCTTTGA | AGAGTGTCTG  | TGAGCCAAAA | AAATTGATGG | GTCTTATTGG | GGTTGATGCA |
| <i>sp. nov. 12</i>                         | CTGGGCTTTGA | AGAGTGTCTG  | TGATCCAAAA | AAATTGATGG | GTCTTATTGG | GGTTGATGCA |
| <i>sp. nov. 13</i>                         | CTGGGCTTTGA | AGAGTGTCTG  | TGATCCAAAA | AAATTGATGG | GTCTTATTGG | GGTTGATGCA |
| <i>sp. nov. 16</i>                         | CTGGGCTTTGA | AGAGTGTCTG  | TGATCCAAAA | AAATTGATGG | GTCTTATTGG | GGTTGATGCA |
| <i>sp. nov. 18</i>                         | CTGGGCTTTGA | AGAGTGTCTG  | TGAGCCAAAA | AAATTGATGG | GTCTTATTGG | GGTTGATGCA |
| <i>sp. nov. 19</i>                         | CTGGGCTTTGA | AGAGCGTCTG  | TGAGCCAAAA | AAATTGATGG | GTCTTATTGG | GGTTGATGCA |
| <i>Didymocarpus hancei</i>                 | CTTGGCTTTGA | AGAGTGTCTG  | TGAGCCAAAA | AAATTGATGG | GTCTTATTGG | GGTTGATGCA |
| <i>Petrocodon dealbatus</i>                | CTGGGCTTTGA | AGAGTGTCTG  | TGAGCCAAAA | AAATTGATGG | GTCTTATTGG | GGTTGATGCA |

|                                                | 310          | 320        | 330        | 340        | 350        | 360        |
|------------------------------------------------|--------------|------------|------------|------------|------------|------------|
| <i>P. bicolor</i>                              | AGAACGCTTT   | TTACCTCTTC | AAGTAGGGCT | TCATTGGATA | AAGCTGTGGC | ATCAAGGGAA |
| <i>P. bipinnatifida</i>                        | AGAACGCTTT   | TTACCTCTTC | AAGTAGGGCT | TCATTGGATA | AAGCTGTGGC | ATCAAGGGAA |
| <i>P. chizhouensis</i>                         | AGAACGCTTT   | TTACCTCTTC | AAGTAGGGCT | TCATTGGATA | AAGCTGTGGC | ATCAAGGGAA |
| <i>P. cordata</i>                              | AGAACGCTTT   | TTACCTCTTC | AAGTAGGGCT | TCATTGGATA | AAGCTGTGGC | ATCAAGGGAA |
| <i>P. depressa</i>                             | AGGACGCTTT   | TTACCTCTTC | AAGTAGGGCT | TCATTGGATA | AAGCTGTGGC | ATCAAGGGAA |
| <i>P. dongguanica</i>                          | AGAACGCTTT   | TTACCTCTTC | AAGTAGGGCT | TCATTGGATA | AAGCTGTGGC | ATCAAGGGAA |
| <i>P. eburnea</i>                              | AGAACGCTTT   | TTACCTCTTC | AAGTAGGGCT | TCATTGGATA | AAGCTGTGGC | ATCAAGGGAA |
| <i>P. fimbrispala</i>                          | AGAACGCTTT   | TTACCTCTTC | AAGTAGGGCT | TCATTGGATA | AAGCTGTGGC | ATCAAGGGAA |
| <i>P. glandulosa</i> var. <i>yangshuoensis</i> | AGGACGCTTT   | TTACCTCTTC | AAGTAGGGCT | TCATTGGATA | AAGCTGTGGC | ATCAAGGGAA |
| <i>P. guelinensis</i> var. <i>brachycar</i>    | AGAACGCTTT   | TTACCTCTTC | AAGTAGGGCT | TCATTGGATA | AAGCTGTGGC | ATCAAGGGAA |
| <i>P. guihaiensis</i>                          | AGAACGCTTT   | TTACCTCTTC | AAGTAGGGCT | TCATTGGATA | AAGCTGTGGC | ATCAAGGGAA |
| <i>P. heterotricha</i> & <i>P. pterippoda</i>  | AGAACGCTTT   | TTACCTCTTC | AAGTAGGGCT | TCATTGGATA | AAGCTGTGGC | ATCAAGGGAA |
| <i>P. huchiensis</i>                           | AGAACGCTTT   | TTACCTCTTC | AAGTAGGGCT | TCATTGGATA | AAGCTGTGGC | ATCAAGGGAA |
| <i>P. huaijiensis</i>                          | AGAACGCTTT   | TTACCTCTTC | AAGTAGGGCT | TCATTGGATA | AAGCTGTGGC | ATCAAGGGAA |
| <i>P. langshanica</i>                          | AGAACGCTTT   | TTACCTCTTC | AAGTAGGGCT | TCATTGGATA | AAGCTGTGGC | ATCAAGGGAA |
| <i>P. latinervis</i>                           | AGAACGCTTT   | TTACCTCTTC | AAGTAGGGCT | TCATTGGATA | AAGCTGTGGC | ATCAAGGGAA |
| <i>P. laxiflora</i>                            | AGAACGCTTT   | TTACCTCTTC | AAGTAGGGCT | TCATTGGATA | AAGCTGTGGC | ATCAAGGGAA |
| <i>P. leprosa</i>                              | AGAACGCTTT   | TTACCTCTTC | AAGTAGGGCT | TCATTGGATA | AAGCTGTGGC | ATCAAGGGAA |
| <i>P. liguliformis</i>                         | AGAACGCTTT   | TTACCTCTTC | AAGTAGGGCT | TCATTGGATA | AAGCTGTGGC | ATCAAGGGAA |
| <i>P. lijiangensis</i>                         | AGAACGCTTT   | TTACCTCTTC | AAGTAGGGCT | TCATTGGATA | AAGCTGTGGC | ATCAAGGGAA |
| <i>P. linearifolia</i>                         | AGAACGCTTT   | TTACCTCTTC | AAGTAGGGCT | TCATTGGATA | AAGCTGTGGC | ATCAAGGGAA |
| <i>P. lobulata</i>                             | AGAACGCTTT   | TTACCTCTTC | AAGTAGGGCT | TCATTGGATA | AAGCTGTGGC | ATCAAGGGAA |
| <i>P. longii</i>                               | AGAACGCTTT   | TTACCTCTTC | AAGTAGGGCT | TCATTGGATA | AAGCTGTGGC | ATCAAGGGAA |
| <i>P. lunglinensis</i>                         | AGATCGCTTT   | TTACCTCTTC | AAGTAGGGCT | TCATTGGATA | AAGCTGTGGC | ATCAAGGGAA |
| <i>P. lungzhouensis</i>                        | AGAACGCTTT   | TTACCTCTTC | AAGTAGGGCT | TCATTGGATA | AAGCTGTGGC | ATCAAGGGAA |
| <i>P. luochengensis</i>                        | AGAACGCTTT   | TTACCTCTTC | AAGTAGGGCT | TCATTGGATA | AAGCTGTGGC | ATCAAGGGAA |
| <i>P. lutea</i>                                | AGAACGCTTT   | TTACCTCTTC | AAGTAGGGCT | TCATTGGATA | AAGCTGTGGC | ATCAAGGGAA |
| <i>P. mabaensis</i>                            | AGGACGCTTT   | TTACCTCTTC | AAGTAGGGCT | TCATTGGATA | AAGCTGTGGC | ATCAAGGGAA |
| <i>P. macrodonta</i>                           | AGAACGCTTT   | TTACCTCTTC | AAGTAGGGCT | TCATTGGATA | AAGCTGTGGC | ATCAAGGGAA |
| <i>P. medica</i>                               | AGGACGCTTT   | TTACCTCTTC | AAGTAGGGCT | TCATTGGATA | AAGCTGTGGC | ATCAAGGGAA |
| <i>P. moii</i>                                 | AGAACGCTTT   | TTACCTCTTC | AAGTAGGGCT | TCATTGGATA | AAGCTGTGGC | ATCAAGGGAA |
| <i>P. mollifolia</i>                           | AGAACGCTTT   | TTACCTCTTC | AAGTAGGGCT | TCATTGGATA | AAGCTGTGGC | ATCAAGGGAA |
| <i>P. obtusidentata</i>                        | AGAACGCTTT   | TTACCTCTTC | AAGTAGGGCT | TCATTGGATA | AAGCTGTGGC | ATCAAGGGAA |
| <i>P. orthandra</i>                            | AGAACGCTTT   | TTACCTCTTC | AAGTAGGGCT | TCATTGGATA | AAGCTGTGGC | ATCAAGGGAA |
| <i>P. parvifolia</i>                           | AGAACGCTTT   | TTACCTCTTC | AAGTAGGGCT | TCATTGGATA | AAGCTGTGGC | ATCAAGGGAA |
| <i>P. pinnatifida</i>                          | AGAACGCTTT   | TTACCTCTTC | AAGTAGGGCT | TCATTGGATA | AAGCTGTGGC | ATCAAGGGAA |
| <i>P. pulchurifolia</i>                        | AGAACGCTTT   | TTACCTCTTC | AAGTAGGGCT | TCATTGGATA | AAGCTGTGGC | ATCAAGGGAA |
| <i>P. renifolia</i>                            | AGAACGCTTT   | TTACCTCTTC | AAGTAGGGCT | TCATTGGATA | AAGCTGTGGC | ATCAAGGGAA |
| <i>P. repanda</i>                              | AGAACGCTTT   | TTACCTCTTC | AAGTAGGGCT | TCATTGGATA | AAGCTGTGGC | ATCAAGGGAA |
| <i>P. ronganensis</i>                          | AGAACGCTTT   | TTACCTCTTC | AAGTAGGGCT | TCATTGGATA | AAGCTGTGGC | ATCAAGGGAA |
| <i>P. sclerophylla</i>                         | AGAACGCTTT   | TTACCTCTTC | AAGTAGGGCT | TCATTGGATA | AAGCTGTGGC | ATCAAGGGAA |
| <i>P. sinensis</i>                             | AGAACGCTTT   | TTACCTCTTC | AAGTAGGGCT | TCATTGGATA | AAGCTGTGGC | ATCAAGGGAA |
| <i>P. spinulosa</i>                            | AGAACGCTTT   | TTACCTCTTC | AAGTAGGGCT | TCATTGGATA | AAGCTGTGGC | ATCAAGGGAA |
| <i>P. subrhomboidea</i>                        | AGAACGCTTT   | TTACCTCTTC | AAGTAGGGCT | TCATTGGATA | AAGCTGTGGC | ATCAAGGGAA |
| <i>P. subrhomboidea</i> var. <i>tribract</i>   | ACAACGCTTT   | TTACCTCTTC | CAGTAGGGCT | TCATTGGATA | AAGCTGTGGC | ATCAAGGGAA |
| <i>P. subulata</i>                             | AGAACGCTTT   | TTACCTCTTC | AAGTAGGGCT | TCATTGGATA | AAGCTGTGGC | ATCAAGGGAA |
| <i>P. swinglei</i>                             | AGAACGCTTT   | TTACCTCTTC | AAGTAGGGCT | TCATTGGATA | AAGCTGTGGC | ATCAAGGGAA |
| <i>P. tabacum</i>                              | AGAACGCTTT   | TTACCTCTTC | AAGTAGGGCT | TCATTGGATA | AAGCTGTGGC | ATCAAGGGAA |
| <i>P. tenuifolia</i>                           | AGAACGCTTT   | TTACCTCTTC | AAGTAGGGCT | TCATTGGATA | AAGCTGTGGC | ATCAAGGGAA |
| <i>P. tenuituba</i>                            | AGAACGCTTT   | TTACCTCTTC | AAGTAGGGCT | TCATTGGATA | AAGCTGTGGC | ATCAAGGGAA |
| <i>P. tiandengensis</i>                        | AGAACGCTTT   | TTACCTCTTC | AAGTAGGGCT | TCATTGGATA | AAGCTGTGGC | ATCAAGGGAA |
| <i>P. tribracteata</i>                         | AGAACGCTTT   | TTACCTCTTC | AAGTAGGGCT | TCATTGGATA | AAGCTGTGGC | ATCAAGGGAA |
| <i>P. villosissima</i>                         | AGAACGCTTT   | TTACCTCTTC | AAGTAGGGCT | TCATTGGATA | AAGCTGTGGC | ATCAAGGGAA |
| <i>P. wentsaii</i>                             | AGAACGCTTT   | TTACCTCTTC | AAGTAGGGCT | TCATTGGATA | AAGCTGTGGC | ATCAAGGGAA |
| <i>P. xiuningensis</i>                         | AGGACGCTTT   | TTACCTCTTC | GAGTAGGGCT | TCATTGGATA | AAGCTGTGGC | ATCAAGGGAA |
| <i>P. xizii</i>                                | AGAACGCTTT   | TTACCTCTTC | AAGTAGGGCT | TCATTGGATA | AAGCTGTGGC | ATCAAGGGAA |
| <i>P. yangchunensis</i>                        | AGAACGCTTT   | TTACCTCTTC | AAGTAGGGCT | TCATTGGATA | AAGCTGTGGC | ATCAAGGGAA |
| <i>P. yongxingensis</i>                        | AGAACGCTTT   | TTACCTCTTC | GAGTAGGGCT | TCATTGGATA | AAGCTGTGGC | ATCAAGGGAA |
| <i>P. yunghuensis</i>                          | AGAACGCTTT   | TTACCTCTTC | AAGTAGGGCT | TCATTGGATA | AAGCTGTGGC | ATCAAGGGAA |
| <i>P. cordifolia</i>                           | AGAACAACCTTT | TTACCTCTTC | AAGTAGGGCT | TCATTGGATA | AAGCTGTGGC | ATCAAGGGAA |
| <i>P. danxiaensis</i>                          | AGAACGCTTT   | TTACCTCTTC | AAGTAGGGCT | TCATTGGATA | AAGCTGTGGC | ATCAAGGGAA |
| <i>P. leiophylla</i> & <i>P. napoensis</i>     | AGAACGCTTT   | TTACCTCTTC | AAGTAGGGCT | TCATTGGATA | AAGCTGTGGC | ATCAAGGGAA |
| <i>P. verecunda</i>                            | AGAACGCTTT   | TTACCTCTTC | AAGTAGGGCT | TCATTGGATA | AAGCTGTGGC | ATCAAGGGAA |
| <i>sp. nov. 6</i>                              | AGAACGCTTT   | TTACCTCTTC | AAGTAGGGCT | TCATTGGATA | AAGCTGTGGC | ATCAAGGGAA |
| <i>sp. nov. 8</i>                              | AGAACGCTTT   | TTACCTCTTC | AAGTAGGGCT | TCATTGGATA | AAGCTGTGGC | ATCAAGGGAA |
| <i>sp. nov. 9</i>                              | AGAACGCTTT   | TTACCTCTTC | AAGTAGGGCT | TCATTGGATA | AAGCTGTGGC | ATCAAGGGAA |
| <i>sp. nov. 10</i>                             | AGAACGCTTT   | TTACCTCTTC | AAGTAGGGCT | TCATTGGATA | AAGCTGTGGC | ATCAAGGGAA |
| <i>sp. nov. 12</i>                             | AGGACGCTTT   | TTACCTCTTC | GAGTAGGGCT | TCATTGGATA | AAGCTGTGGC | ATCAAGGGAA |
| <i>sp. nov. 13</i>                             | AGGACGCTTT   | TTACCTCTTC | AAGTAGGGCT | TCATTGGATA | AAGCTGTGGC | ATCAAGGGAA |
| <i>sp. nov. 16</i>                             | AGAACAACCTTT | TTACCTCTTC | AAGTAGGGCT | TCATTGGATA | AAGCTGTGGC | ATCAAGGGAA |
| <i>sp. nov. 18</i>                             | AGAACGCTTT   | TTACCTCTTC | AAGTAGGGCT | TCATTGGATA | AAGCTGTGGC | ATCAAGGGAA |
| <i>sp. nov. 19</i>                             | AGAACGCTTT   | TTACCTCTTC | AAGTAGGGCT | TCATTGGATA | AAGCTGTGGC | ATCAAGGGAA |
| <i>Didymocarpus hancei</i>                     | AGAACCCTTT   | TTACCTCTTC | ATGTAGGGCT | TCATTGGATA | AAGCTGTGGC | ATCAAGGGAA |
| <i>Petrocodon dealbatus</i>                    | AGAACCCTTT   | TTACCTCTTC | ATGTAGGGCT | TCATTGGATA | AAGCTGTGGC | ATCAAGGGAA |







|                                                | 490        | 500        | 510        | 520        | 530        | 540        |
|------------------------------------------------|------------|------------|------------|------------|------------|------------|
| <i>P. bicolor</i>                              | CCTGCTATGT | TGCATGCTAG | TGCTGTGCAA | TGCTGTGCAA | TAGCTGTGAG | AGCCATATCT |
| <i>P. bipinnatifida</i>                        | CCTGCGATGT | TGCATGCTAG | TGCTGTGCAA | TGCTGTGCAA | TAGCTGTGAG | AGCCATATCT |
| <i>P. chizhouensis</i>                         | CCTGCTATGT | TGCATGCTAG | TGCTGTGCAA | TGCTGTGCAA | TAGCTGTGAG | AGCCATATCT |
| <i>P. cordata</i>                              | CCTGCTATGT | TGCATGCTAG | TGCTGTGCAA | TGCTGTGCAA | TAGCTGTGAG | AGCCATATCT |
| <i>P. depressa</i>                             | CCTGGTATGT | TGCATGCTAG | TGCTGTGCAA | TGCTGTGCAA | TAGCTGTGAG | AGCCATATCT |
| <i>P. dongguanica</i>                          | CCTGCTATGT | TGCATGCTAG | TGCTGTGCAA | TGCTGTGCAA | TAGCTGTGAG | AGCCATATCT |
| <i>P. eburnea</i>                              | CCTGCTATGT | TGCATGCTAG | TGCTGTGCAA | TGCTGTGCAA | TAGCTGTGAG | AGCCATATCT |
| <i>P. fimbrispala</i>                          | CCTGCTATGT | TGCATGCTAG | TGCTGTGCAA | TGCTGTGCAA | TAGCTGTGAG | AGCCATATCT |
| <i>P. glandulosa</i> var. <i>yangshuoensis</i> | CCTGCTATGT | TGCATGCTAG | TGCTGTGCAA | TGCTGTGCAA | TAGCTGTGAG | AGCCATATCT |
| <i>P. guelinensis</i> var. <i>brachycar</i>    | CCTGCTATGT | TGCATGCTAG | TGCTGTGCAA | TGCTGTGCAA | TAGCTGTGAG | AGCCATATCT |
| <i>P. guihaiensis</i>                          | CCTGCTATGT | TGCATGCTAG | TGCTGTGCAA | TGCTGTGCAA | TAGCTGTGAG | AGCCATATCT |
| <i>P. heterotricha</i> & <i>P. pterippoda</i>  | CCTGCTATGT | TGCATGCTAG | TGCTGTGCAA | TGCTGTGCAA | TAGCTGTGAG | AGCCATATCT |
| <i>P. hochiensis</i>                           | CCTGCTATGT | TGCATGCTAG | TGCTGTGCAA | TGCTGTGCAA | TAGCTGTGAG | AGCCATATCT |
| <i>P. huaijiensis</i>                          | CCTGCTATGT | TGCATGCTAG | TGCTGTGCAA | TGCTGTGCAA | TAGCTGTGAG | AGCCATATCT |
| <i>P. langshanica</i>                          | CCTGCTATGT | TGCATGCTAG | TGCTGTGCAA | TGCTGTGCAA | TAGCTGTGAG | AGCCATATCT |
| <i>P. latinervis</i>                           | CCTGCTATGT | TGCATGCTAG | TGCTGTGCAA | TGCTGTGCAA | TAGCTGTGAG | AGCCATATCT |
| <i>P. laxiflora</i>                            | CCCGCTATGT | TGCATGCTAG | TGCTGTGCAA | TGCTGTGCAA | TAGCTGTGAG | AGCCATATCT |
| <i>P. leprosa</i>                              | CCTGCTATGT | TGCATGCTAG | TGCTGTGCAA | TGCTGTGCAA | TAGCTGTGAG | AGCCATATCT |
| <i>P. liguliformis</i>                         | CCTGCTATGT | TGCATGCTAG | TGCTGTGCAA | TGCTGTGCAA | TAGCTGTGAG | AGCCATATCT |
| <i>P. lijiangensis</i>                         | CCTGCTATGT | TGCATGCTAG | TGCTGTGCAA | TGCTGTGCAA | TAGCTGTGAG | AGCCATATCT |
| <i>P. linearifolia</i>                         | CCTTCTATGT | TGCATGCTAG | TGCTGTGCAA | TGCTGTGCAA | TAGCTGTGAG | AGCCATATCT |
| <i>P. lobulata</i>                             | CCTGCTATGT | TGCATGCTAG | TGCTGTGCAA | TGCTGTGCAA | TAGCTGTGAG | AGCCATATCT |
| <i>P. longii</i>                               | CCTGCTATGT | TGCATGCTAG | TGCTGTGCAA | TGCTGTGCAA | TAGCTGTGAG | AGCCATATCT |
| <i>P. lunglinensis</i>                         | CCTGCTATGT | TGCATGCTAG | TGCTGTGCAA | TGCTGTGCAA | TAGCTGTGAG | AGCCATATCT |
| <i>P. lungzhouensis</i>                        | CCTGCTATGT | TGCATGCTAG | TGCTGTGCAA | TGCTGTGCAA | TAGCTGTGAG | AGCCATATCT |
| <i>P. luochengensis</i>                        | CCTGCTATGT | TGCATGCTAG | TGCTGTGCAA | TGCTGTGCAA | TAGCTGTGAG | AGCCATATCT |
| <i>P. lutea</i>                                | CCTGCTATGT | TGCATGCTAG | TGCTGTGCAA | TGCTGTGCAA | TAGCTGTGAG | AGCCATATCT |
| <i>P. mabaensis</i>                            | CCTGCTATGT | TGCATGCTAG | TGCTGTGCAA | TGCTGTGCAA | TAGCTGTGAG | AGCCATATCT |
| <i>P. macrodonta</i>                           | CCTGCTATGT | TGCATGCTAG | TGCTGTGCAA | TGCTGTGCAA | TAGCTGTGAG | AGCCATATCT |
| <i>P. medica</i>                               | CCTGCTATGT | TGCATGCTAG | TGCTGTGCAA | TGCTGTGCAA | TAGCTGTGAG | AGCCATATCT |
| <i>P. moi</i>                                  | CCTGCTATGT | TGCATGCTAG | TGCTGTGCAA | TGCTGTGCAA | TAGCTGTGAG | AGCCATATCT |
| <i>P. mollifolia</i>                           | CCTGCTATGT | TGCATGCTAG | TGCTGTGCAA | TGCTGTGCAA | TAGCTGTGAG | AGCCATATCT |
| <i>P. obtusidentata</i>                        | CCTGCTATGT | TGCATGCTAG | TGCTGTGCAA | TGCTGTGCAA | TAGCTGTGAG | AGCCATATCT |
| <i>P. orthandra</i>                            | CCTGCTATGT | TGCATGCTAG | TGCTGTGCAA | TGCTGTGCAA | TAGCTGTGAG | AGCCATATCT |
| <i>P. parvifolia</i>                           | CCTGCTATGT | TGCATGCTAG | TGCTGTGCAA | TGCTGTGCAA | TAGCTGTGAG | AGCCATATCT |
| <i>P. pinnatifida</i>                          | CCTGCTATGT | TGCATGCTAG | TGCTGTGCAA | TGCTGTGCAA | TAGCTGTGAG | AGCCATATCT |
| <i>P. pulchurifolia</i>                        | CCTTCTATGT | TGCATGCTAG | TGCTGTGCAA | TGCTGTGCAA | TAGCTGTGAG | AGCCATATCT |
| <i>P. renifolia</i>                            | CCTGCTATGT | TGCATGCTAG | TGCTGTGCAA | TGCTGTGCAA | TAGCTGTGAG | AGCCATATCT |
| <i>P. repanda</i>                              | CCTGCGATGT | TGCATGCTAG | TGCTGTGCAA | TGCTGTGCAA | TAGCTGTGAG | AGCCATATCT |
| <i>P. ronganensis</i>                          | CCTGCTATGT | TGCATGCTAG | TGCTGTGCAA | TGCTGTGCAA | TAGCTGTGAG | AGCCATATCT |
| <i>P. sclerophylla</i>                         | CCTGCTATGT | TGCATGCTAG | TGCTGTGCAA | TGCTGTGCAA | TAGCTGTGAG | AGCCATATCT |
| <i>P. sinensis</i>                             | CCTGCTATGT | TGCATGCTAG | TGCTGTGCAA | TGCTGTGCAA | TAGCTGTGAG | AGCCATATCT |
| <i>P. spinulosa</i>                            | CCTGCTATGT | TGCATGCTAG | TGCTGTGCAA | TGCTGTGCAA | TAGCTGTGAG | AGCCATATCT |
| <i>P. subrhomboidea</i>                        | CCTGCTATGT | TGCATGCTAG | TGCTGTGCAA | TGCTGTGCAA | TAGCTGTGAG | AGCCATATCT |
| <i>P. subrhomboidea</i> var. <i>tribract</i>   | CCTGCTATGT | TGCATGCTAG | TGCTGTGCAA | TGCTGTGCAA | TAGCTGTGAG | AGCCATATCT |
| <i>P. subulata</i>                             | CCTGCTATGT | TGCATGCTAG | TGCTGTGCAA | TGCTGTGCAA | TAGCTGTGAG | AGCCATATCT |
| <i>P. swinglei</i>                             | CCTTCTATGT | TGCATGCTAG | TGCTGTGCAA | TGCTGTGCAA | TAGCTGTGAG | AGCCATATCT |
| <i>P. tabacum</i>                              | CCTGCTATGT | TGCATGCTAG | TGCTGTGCAA | TGCTGTGCAA | TAGCTGTGAG | AGCCATATCT |
| <i>P. tenuifolia</i>                           | CCTGCTATGT | TGCATGCTAG | TGCTGTGCAA | TGCTGTGCAA | TAGCTGTGAG | AGCCATATCT |
| <i>P. tenuituba</i>                            | CCTGCTATGT | TGCATGCTAG | TGCTGTGCAA | TGCTGTGCAA | TAGCTGTGAG | AGCCATATCT |
| <i>P. tiandengensis</i>                        | CCTGCTATGT | TGCATGCTAG | TGCTGTGCAA | TGCTGTGCAA | TAGCTGTGAG | AGCCATATCT |
| <i>P. tribracteata</i>                         | CCTGCTATGT | TGCATGCTAG | TGCTGTGCAA | TGCTGTGCAA | TAGCTGTGAG | AGCCATATCT |
| <i>P. villosissima</i>                         | CCTGCTATGT | TGCATGCTAG | TGCTGTGCAA | TGCTGTGCAA | TAGCTGTGAG | AGCCATATCT |
| <i>P. wentsai</i>                              | CCTGCTATGT | TGCATGCTAG | TGCTGTGCAA | TGCTGTGCAA | TAGCTGTGAG | AGCCATATCT |
| <i>P. xiuningensis</i>                         | CCTGCTATGT | TGCATGCTAG | TGCTGTGCAA | TGCTGTGCAA | TAGCTGTGAG | AGCCATATCT |
| <i>P. xizii</i>                                | CCTGCTATGT | TGCATGCTAG | TGCTGTGCAA | TGCTGTGCAA | TAGCTGTGAG | AGCCATATCT |
| <i>P. yangchunensis</i>                        | CCTGCTATGT | TGCATGCTAG | TGCTGTGCAA | TGCTGTGCAA | TAGCTGTGAG | AGCCATATCT |
| <i>P. yongxingensis</i>                        | CCTGCTATGT | TGCATGCTAG | TGCTGTGCAA | TGCTGTGCAA | TAGCTGTGAG | AGCCATATCT |
| <i>P. yunghuensis</i>                          | CCTGCTATGT | TGCATGCTAG | TGCTGTGCAA | TGCTGTGCAA | TAGCTGTGAG | AGCCATATCT |
| <i>P. cordifolia</i>                           | CCTGCTATGT | TGCATGCTAG | TGCTGTGCAA | TGCTGTGCAA | TAGCTGTGAG | AGCCATATCT |
| <i>P. danxiaensis</i>                          | CCTGCTATGT | TGCATGCTAG | TGCTGTGCAA | TGCTGTGCAA | TAGCTGTGAG | AGCCATATCT |
| <i>P. leiophylla</i> & <i>P. napoensis</i>     | CCTGCTATGT | TGCATGCTAG | TGCTGTGCAA | TGCTGTGCAA | TAGCTGTGAG | AGCCATATCT |
| <i>P. verecunda</i>                            | CCTGCTATGT | TGCATGCTAG | TGCTGTGCAA | TGCTGTGCAA | TAGCTGTGAG | AGCCATATCT |
| <i>sp. nov. 6</i>                              | CCTGCTATGT | TGCATGCTAG | TGCTGTGCAA | TGCTGTGCAA | TAGCTGTGAG | AGCCATATCT |
| <i>sp. nov. 8</i>                              | CCTGCTATGT | TGCATGCTAG | TGCTGTGCAA | TGCTGTGCAA | TAGCTGTGAG | AGCCATATCT |
| <i>sp. nov. 9</i>                              | CCTGCTATGT | TGCATGCTAG | TGCTGTGCAA | TGCTGTGCAA | TAGCTGTGAG | AGCCATATCT |
| <i>sp. nov. 10</i>                             | CCTGCTATGT | TGCATGCTAG | TGCTGTGCAA | TGCTGTGCAA | TAGCTGTGAG | AGCCATATCT |
| <i>sp. nov. 12</i>                             | CCTGCTATGT | TGCATGCTAG | TGCTGTGCAA | TGCTGTGCAA | TAGCTGTGAG | AGCCATATCT |
| <i>sp. nov. 13</i>                             | CCTGCTATGT | TGCATGCTAG | TGCTGTGCAA | TGCTGTGCAA | TAGCTGTGAG | AGCCATATCT |
| <i>sp. nov. 16</i>                             | CCTGCTATGT | TGCATGCTAG | TGCTGTGCAA | TGCTGTGCAA | TAGCTGTGAG | AGCCATATCT |
| <i>sp. nov. 18</i>                             | CCTGCTATGT | TGCATGCTAG | TGCTGTGCAA | TGCTGTGCAA | TAGCTGTGAG | AGCCATATCT |
| <i>sp. nov. 19</i>                             | CCTGCTATGT | TGCATGCTAG | TGCTGTGCAA | TGCTGTGCAA | TAGCTGTGAG | AGCCATATCT |
| <i>Didymocarpus hancei</i>                     | CCTGCTATGT | TGCATGCTAG | TGCTGTGCAA | TGCTGTGCAA | TAGCTGTGAG | AGCCATATCT |
| <i>Petrocodon dealbatus</i>                    | CCTGCTATGT | TGCATGCTAG | TGCTGTGCAA | TGCTGTGCAA | TAGCTGTGAG | AGCCATATCT |

|                                            | 550         | 560         | 570        | 580        | 590        | 600        |
|--------------------------------------------|-------------|-------------|------------|------------|------------|------------|
| <i>P. bicolor</i>                          | AGGCTGCAGT  | CTCTTCCCTGG | GGGCGATGTA | GGAGTTTTGT | GTGATACAGT | CGTAGAAGAT |
| <i>P. bipinnatifida</i>                    | AGGCTGCAGT  | CTCTTCCCTGG | GGGCGATGTA | GGAGTTTTGT | GTGATACAGT | CGTAGAAGAT |
| <i>P. chizhouensis</i>                     | AGGCTGCAGT  | CTCTTCCCTGG | GGGCGATGTA | GGAGTTTTGT | GTGATACAGT | CGTAGAAGAT |
| <i>P. cordata</i>                          | AGGCTGCAGT  | CTCTTCCCTGG | GGGCGATGTT | GGAGTTTTGT | GTGATACAGT | CGTAGAAGAT |
| <i>P. depressa</i>                         | AGGCTGCAGT  | CTCTTCCCTGG | GGGCGATGTA | GGAGTTTTGT | GTGACACAGT | CGTAGAAGAT |
| <i>P. dongguanica</i>                      | AGGCTGCAGT  | CTCTTCCCTGG | GGGCGATGTA | GGAGTTTTGT | GTGATACAGT | CGTTGAAGAT |
| <i>P. eburnea</i>                          | AGGCTGCAGT  | CTCTTCCCTGG | GGGCGATGTA | GGAGTTTTGT | GTGATACAGT | CGTAGAAGAT |
| <i>P. fimbrispala</i>                      | AGGCTGCAGT  | CTCTTCCCTGG | GGGCGATGTT | GGAGTTTTGT | GTGATACAGT | CGTAGAAGAT |
| <i>P. glandulosa var. yangshuoensis</i>    | AGGCTGCAGT  | CTCTTCCCTGG | GGGCGATGTA | GGAGTTTTGT | GTGATACAGT | CGTAGAAGAT |
| <i>P. guelinensis var. brachycar</i>       | AGGCTGCAGT  | CTCTTCCCTGG | GGGCGATGTA | GGAGTTTTGT | GTGATACAGT | CGTAGAAGAT |
| <i>P. guihaiensis</i>                      | AGGCTGCAGT  | CTCTTCCCTGG | GGGCGATGTT | GGAGTTTTGT | GTGATACAGT | CGTAGAAGAT |
| <i>P. heterotricha &amp; P. pterippoda</i> | AGGCTGCAGT  | CTCTTCCCTGG | GGGCGATGTA | GGAGTTTTGT | GTGATACAGT | CGTAGAAGAT |
| <i>P. hochiensis</i>                       | AGGCTGCAGT  | CTCTTCCCTGG | GGGTGATGTT | GGAGTTTTGT | GTGATACAGT | CGTAGAAGAT |
| <i>P. huaijiensis</i>                      | AGGCTGCAGG  | CTCTTCCCTGG | GGGCGATGTA | GGAGTTTTGT | GTGATACAGT | CGTAGAAGAT |
| <i>P. langshanica</i>                      | AGGCTGCAGT  | CTCTTCCCTGG | GGGCGATGTA | GGAGTTTTGT | GTGATACAGT | CGTAGAAGAT |
| <i>P. latinervis</i>                       | AGGCTGCAGT  | CTCTTCCCTGG | GGGCGATGTA | GGAGTTTTGT | GTGATACAGT | TGTAGAAGAT |
| <i>P. laxiflora</i>                        | AGGCTGCAGT  | CTCTTCCCTGG | GGGCGATGTA | GGAGTTTTGT | GTGATACAGT | CGTAGAAGAT |
| <i>P. leprosa</i>                          | AGGCTGCAGT  | CTCTTCCCTGG | GGGCGATGTA | GGAGTTTTGT | GTGATACAGT | CGTAGAAGAT |
| <i>P. liguliformis</i>                     | AGGCTGCAGT  | CTCTTCCCTGG | GGGCGATGTA | GGAGTTTTGT | GTGATACAGT | CGTAGAAGAT |
| <i>P. lijiangensis</i>                     | AGGCTGCAGT  | CTCTTCCCTGG | GGGCGATGTT | GGAGTTTTGT | GTGATACAGT | CGTAGAAGAT |
| <i>P. linearifolia</i>                     | AGGCTGCAGT  | CTCTTCCCTGG | GGGCGATGTA | GGAGTTTTGT | GTGATACAGT | CGTAGAAGAT |
| <i>P. lobulata</i>                         | AGGCTGCAGT  | CTCTTCCCTGG | GGGCGATGTA | GGAGTTTTGT | GTGATACAGT | CGTAGAAGAT |
| <i>P. longii</i>                           | AGGCTGCAGT  | CTCTTCCCTGG | GGGCGATGTT | GGAGTTTTGT | GTGATACAGT | CGTAGAAGAT |
| <i>P. lunglinensis</i>                     | AGGCTGCAGT  | CTCTTCCCTGG | GGGCGATGTA | GGAGTTTTGT | GTGATACAGT | CGTAGAAGAT |
| <i>P. lungzhouensis</i>                    | AGGCTGCAGT  | CTCTTCCCTGG | GGGCGATGTA | GGAGTTTTGT | GTGATACAGT | CGTAGAAGAT |
| <i>P. luochengensis</i>                    | AGGCTGCAGT  | CTCTTCCCTGG | GGGCGATGTA | GGAGTTTTGT | GTGATACAGT | CGTAGAAGAT |
| <i>P. lutea</i>                            | AGGCTGCAGT  | CTCTTCCCTGG | GGGCGATGTA | GGAGTTTTGT | GTGATACAGT | CGTAGAAGAT |
| <i>P. mabaensis</i>                        | AGGCTGCAGT  | CTCTTCCCTGG | GGGCGATGTA | GGAGTTTTGT | GTGACACAGT | CGTAGAAGAT |
| <i>P. macrodonta</i>                       | AGGCTGCAGT  | CTCTTCCCTGG | GGGCGATGTA | GGAGTTTTGT | GTGATACAGT | CGTAGAAGAT |
| <i>P. medica</i>                           | AGGCTGCAGT  | CTCTTCCCTGG | GGGCGATGTA | GGAGTTTTGT | GCGATACAGT | CGTAGAAGAT |
| <i>P. moii</i>                             | AGGCTGCAGT  | CTCTTCCCTGG | GGGCGATGTA | GGAGTTTTGT | GTGATACAGT | CGTAGAAGAT |
| <i>P. mollifolia</i>                       | AGGCTGCAGT  | CTCTTCCCTGG | GGGCGATGTA | GGAGTTTTGT | GTGATACAGT | CGTAGAAGAT |
| <i>P. obtusidentata</i>                    | AGGCTGCAGT  | CTCTTCCCTGG | GGGCGACGTA | GGAGTTTTGT | GTGATACAGT | CGTAGAAGAT |
| <i>P. orthandra</i>                        | AGGCTGCAGT  | CTCTTCCCTGG | GGGCGATGTA | GGAGTTTTGT | GTGATACAGT | CGTAGAAGAT |
| <i>P. parvifolia</i>                       | AGGCTGCAGT  | CTCTTCCCTGG | GGGCGATGTT | GGAGTTTTGT | GTGATACAGT | CGTAGAAGAT |
| <i>P. pinnatifida</i>                      | AGGCTGCAGT  | CTCTTCCCTGG | GGGCGATGTA | GGAGTTTTGT | GTGATACAGT | CGTAGAAGAT |
| <i>P. pulchurifolia</i>                    | AGGCTGCAGT  | CTCTTCCCTGG | GGGCGATGTA | GGAGTTTTGT | GTGATACAGT | CGTAGAAGAT |
| <i>P. renifolia</i>                        | AGGCTGCAGT  | CTCTTCCCTGG | GGGCGATGTT | GGAGTTTTGT | GTGATACAGT | CGTAGAAGAT |
| <i>P. repanda</i>                          | AGGCTGCAGT  | CTCTTCCCTGG | GGGCGATGTT | GGAGTTTTGT | GTGATACAGT | CGTAGAAGAT |
| <i>P. ronganensis</i>                      | AGGCTGCAGT  | CTCTTCCCTGG | GGGCGATGTA | GGAGTTTTGT | GTGATACAGT | CGTAGAAGAT |
| <i>P. sclerophylla</i>                     | AGGCTGCAGT  | CTCTTCCCTGG | GGGCGATGTA | GGAGTTCTGT | GTGATACAGT | CGTAGAAGAT |
| <i>P. sinensis</i>                         | AGGCTGCAGT  | CTCTTCCCTGG | GGGCGATGTA | GGAGTTTTGT | GTGATACAGT | CGTAGAAGAT |
| <i>P. spinulosa</i>                        | AGGCTGCAGT  | CTCTTCCCTGG | GGGCGATGTA | GGAGTTTTGT | GTGACACAGT | CGTAGAAGAT |
| <i>P. subrhomboidea</i>                    | AGGCTGCAGT  | CTCTTCCCTGG | GGGCGATGTT | GGAGTTTTGT | GTGATACAGT | CGTAGAAGAT |
| <i>P. subrhomboidea var. tribract</i>      | AGGCTGCAGT  | CTCTTCCCTGG | GGGCGATGTA | GGAGTTTTGT | GTGATACAGT | CGTAGAAGAT |
| <i>P. subulata</i>                         | AGGCTGCAGT  | CTCTTCCCTGG | GGGCGATGTA | GGAGTTTTGT | GTGATACAGT | CGTAGAAGAT |
| <i>P. swinglei</i>                         | AGGCTGCAGT  | CTCTTCCCTGG | GGGCGATGTA | GGAGTTTTGT | GTGATACAGT | CGTAGAAGAT |
| <i>P. tabacum</i>                          | AGGCTGCAGT  | CTCTTCCCTGG | GGGCGATGTA | GGAGTTTTGT | GTGATACAGT | CGTAGAAGAT |
| <i>P. tenuifolia</i>                       | AGGCTGCAGT  | CTCTTCCCTGG | GGGCGATGTT | GGAGTTCTGT | GTGATACAGT | CGTAGAAGAT |
| <i>P. tenuituba</i>                        | AGGCTGCAGT  | CTCTTCCCTGG | GGGCGATGTA | GGAGTTTTGT | GTGATACAGT | CGTAGAAGAT |
| <i>P. tiandengensis</i>                    | AGGCTGCAGT  | CTCTTCCCTGG | GGGCGATGTA | GGAGTTTTGT | GTGATACAGT | CGTAGAAGAT |
| <i>P. tribracteata</i>                     | AGGCTGCAGT  | CTCTTCCCTGG | GGGCGATGTA | GGAGTTTTGT | GTGATACAGT | CGTAGAAGAT |
| <i>P. villosissima</i>                     | AGGCTGCAGT  | CTCTTCCCTGG | GGGCGATGTA | GGAGTTTTGT | GTGATACAGT | CGTAGAAGAT |
| <i>P. wentsaii</i>                         | AAAGCTGCAGT | CTCTTCCCTGG | GGGCGATGTA | GGAGTTTTGT | GTGATACAGT | CGTAGAAGAT |
| <i>P. xiuningensis</i>                     | AGGCTGCAGT  | CTCTTCCCTGG | GGGCGATGTA | GGAAITTTGT | GTGATACAGT | CGTAGAAGAT |
| <i>P. xizii</i>                            | AGGCTGCAGT  | CTCTTCCCTGG | GGGCGATGTA | GGAGTTTTGT | GTGATACAGT | CGTAGAAGAT |
| <i>P. yangchunensis</i>                    | AGGCTGCAGT  | CTCTTCCCTGG | GGGCGATGTA | GGAGTTTTGT | GTGATACAGT | CGTAGAAGAT |
| <i>P. yongxingensis</i>                    | AGGCTGCAGT  | CTCTTCCCTGG | GGGCGATGTA | GGAGTTTTGT | GTGATACAGT | CGTAGAAGAT |
| <i>P. yungfuensis</i>                      | AGGCTGCAGT  | CTCTTCCCTGG | GGGCGATGTA | GGAGTTTTGT | GTGATACAGT | CGTAGAAGAT |
| <i>P. cordifolia</i>                       | AGGCTGCAGT  | CTCTTCCCTGG | GGGCGATGTT | GGAGTTTTGT | GTGATACAGT | CGTAGAAGAT |
| <i>P. danxiaensis</i>                      | AGGCTGCAGT  | CTCTTCCCTGG | GGGCGATGTA | GGAGTTTTGT | GTGACACAGT | CGTAGAAGAT |
| <i>P. leiophylla &amp; P. napoensis</i>    | AGGCTGCAGT  | CTCTTCCCTGG | GGGCGATGTA | GGAGTTTTGT | GTGATACAGT | CGTAGAAGAT |
| <i>P. verecunda</i>                        | AGGCTGCAGT  | CTCTTCCCTGG | GGGCGATGTA | GGAGTTTTGT | GTGATACAGT | CGTAGAAGAT |
| <i>sp. nov. 6</i>                          | AGGCTGCAGT  | CTCTTCCCTGG | GGGAGATGTA | GGAGTTTTGT | GTGATACAGT | CGTAGAAGAT |
| <i>sp. nov. 8</i>                          | AGGCTGCAGT  | CTCTTCCCTGG | GGGCGATGTA | GGAGTTTTGT | GTGATACAGT | CGTAGAAGAT |
| <i>sp. nov. 9</i>                          | AGGCTGCAGT  | CTCTTCCCTGG | GGGCGATGTA | GGAGTTTTGT | GTGATACAGT | CGTAGAAGAT |
| <i>sp. nov. 10</i>                         | AGGCTGCAGT  | CTCTTCCCTGG | GGGCGATGTA | GGAGTTTTGT | GTGATACAGT | CGTAGAAGAT |
| <i>sp. nov. 12</i>                         | AGGCTGCAGT  | CTCTTCCCTGG | GGGCGATGTA | GGAGTTTTGT | GTGATACAGT | CGTAGAAGAT |
| <i>sp. nov. 13</i>                         | AGGCTGCAGT  | CTCTTCCCTGG | GGGCGATGTA | GGAGTTTTGT | GTGACACAGT | CGTAGAAGAT |
| <i>sp. nov. 16</i>                         | AGGCTGCAGT  | CTCTTCCCTGG | GGGCGATGTA | GGAGTTTTGT | GTGATACAGT | CGTAGAAGAT |
| <i>sp. nov. 18</i>                         | AGGCTGCAGT  | CTCTTCCCTGG | GGGCGATGTA | GGAGTTTTGT | GTGATACAGT | CGTAGAAGAT |
| <i>sp. nov. 19</i>                         | AGGCTGCAGT  | CTCTTCCCTGG | GGGCGATGTA | GGAGTTTTGT | GTGATACAGT | CGTAGAAGAT |
| <i>Didymocarpus hancei</i>                 | AGGCTGCAGT  | CTCTTCCAGG  | GGGCGATGTA | GGAGTTTTGT | GTGATACAGT | CGTAGAAGAT |
| <i>Petrocodon dealbatus</i>                | AGGCTGCAGT  | CTCTTCCAGG  | GGGCGATGTA | GGAGTTTTGT | GTGATACAGT | CGTAGAAGAT |



|                                                | 670         | 680        | 690        | 700        | 710        | 720        |
|------------------------------------------------|-------------|------------|------------|------------|------------|------------|
| <i>P. bicolor</i>                              | GGAGAGGTTAG | TGTCAGAAAT | TAGAAGGTCC | GACTTAGAAC | CTTATTTGGG | GCTGCACTAT |
| <i>P. bipinnatifida</i>                        | GGAGAGGTTAG | TGTCAGAAAT | TAGAAGGTCC | GACTTAGAAC | CTTATTTGGG | GCTGCACTAT |
| <i>P. chizhouensis</i>                         | GGAGAGGTTAG | TGTCAGAAAT | TAGAAGGTCC | GACTTGGAAC | CTTATTTGGG | GCTGCACTAT |
| <i>P. cordata</i>                              | GGAGAGGTTAC | TGTCAGAAAT | TAGAAGGTCC | GACTTAGAGC | CTTATTTGGG | GCTGCACTAT |
| <i>P. depressa</i>                             | GGAGAGGTTAG | TGTCAGAAAT | TAGAAGGTCC | GACTTAGAAC | CTTATTTGGG | GCTGCACTAT |
| <i>P. dongguanica</i>                          | GGAGAGGTTAG | TGTCAGAAAT | TAGAAGGTCC | GACTTAGAGC | CTTATTTGGG | GCTGCACTAT |
| <i>P. eburnea</i>                              | GGAGAGGTTAG | TGTCAGAAAT | TAGAAGGTCC | GACTTAGAAC | CTTATTTGGG | GCTGCACTAT |
| <i>P. fimbrispala</i>                          | GGAGAGGTTAG | TGTCAGAAAT | TAGAAGGTCC | GACTTAGAGC | CTTATTTGGG | GCTGCACTAT |
| <i>P. glandulosa</i> var. <i>yangshuoensis</i> | GGAGAGGTTAG | TGTCAGAAAT | TAGAAGGTCC | GACTTAGAGC | CTTATTTGGG | GCTGCACTAT |
| <i>P. guelinensis</i> var. <i>brachycar</i>    | GGAGAGGTTAG | TGTCAGAAAT | TAGAAGGTCC | GACTTAGAAC | CTTATTTGGG | GCTGCACTAT |
| <i>P. guihaiensis</i>                          | GGAGAGGTTAG | TGTCAGAAAT | TAGAAGGTCC | GACTTAGAGC | CTTATTTGGG | GCTGCACTAT |
| <i>P. heterotricha</i> & <i>P. pterippoda</i>  | GGAGAGGTTAG | TGTCAGAAAT | TAGAAGGTCC | GACTTAGAAC | CTTATTTGGG | ACTGCACTAT |
| <i>P. hochiensis</i>                           | GGAGAGGTTAG | TGTCAGAAAT | TAGAAGGTCC | GACTTAGAGC | CTTATTTGGG | GCTGCACTAT |
| <i>P. huaijiensis</i>                          | GGAGAGGTTAG | TGTCAGAAAT | TAGAAGGTCC | GACTTAGAAC | CTTATTTGGG | GCTGCACTAT |
| <i>P. langshamica</i>                          | GGAGAGGTTAG | TGTCAGAAAT | TAGAAGGTCC | GACTTAGAAC | CTTATTTGGG | GCTGCACTAT |
| <i>P. latinervis</i>                           | GGAGAGGTTAG | TGTCAGAAAT | TAGAAGGTCC | GACTTAGAAC | CTTATTTGGG | GCTGCACTAT |
| <i>P. laxiflora</i>                            | GGAGAGGTTAG | TGTCAGAGAT | TAGAAGGTCC | GACTTAGAAC | CTTATTTGGG | GCTGCACTAT |
| <i>P. leprosa</i>                              | GGAGAGGTTAG | TGTCAGAAAT | TAGAAGGTCC | GACTTAGAAC | CTTATTTGGG | GCTGCACTAT |
| <i>P. liguliformis</i>                         | GGAGAGGTTAG | TGTCAGAAAT | TAGAAGGTCC | GACTTAGAAC | CTTATTTGGG | GCTGCACTAT |
| <i>P. lijiangensis</i>                         | GGAGAGGTTAG | TGTCAGAAAT | TAGAAGGTCC | GACTTAGAGC | CTTATTTGGG | GCTGCACTAT |
| <i>P. linearifolia</i>                         | GGAGAGGTTGG | TGTCAGAAAT | TAGAAGGTCC | GACTTAGAAC | CTTATTTGGG | GCTGCACTAT |
| <i>P. lobulata</i>                             | GGAGAGGTTAG | TGTCAGAAAT | TAGAAGGTCC | GACTTAGAAC | CTTATTTGGG | GCTGCACTAT |
| <i>P. longii</i>                               | GGAGAGGTTAG | TGTCAGAAAT | TAGAAGGTCC | GACTTAGAAC | CTTATTTGGG | GCTGCACTAT |
| <i>P. lunglinensis</i>                         | GGAGAGGTTGG | TGTCAGAAAT | TAGAAGGTCC | GACTTAGAAC | CTTATTTGGG | GCTGCACTAT |
| <i>P. lungzhouensis</i>                        | GGAGAGGTTAG | TGTCAGAAAT | TAGAAGGTCC | GACTTAGAGC | CTTATTTGGG | GCTGCACTAT |
| <i>P. luochengensis</i>                        | GGAGAGGTTAG | TGTCAGAAAT | TAGAAGGTCC | GACTTAGAAC | CTTATTTGGG | GCTGCACTAT |
| <i>P. lutea</i>                                | GGAGAGGTTAG | TGTCAGAAAT | TAGAAGGTCC | GACTTAGAAC | CTTATTTGGG | GCTGCACTAT |
| <i>P. mabaensis</i>                            | GGAGAGGTTAG | TGTCAGAAAT | TAGAAGGTCC | GACTTAGAAC | CTTATTTGGG | GCTGCACTAT |
| <i>P. macrodonta</i>                           | GGAGAGGTTAG | TGTCAGAAAT | TAGAAGGTCC | GACTTAGAAC | CTTATTTGGG | GCTGCACTAT |
| <i>P. medica</i>                               | GGAGAGGTTAG | TGTCAGAAAT | TAGAAGGTCC | GACTTAGAGC | CTTATTTGGG | GCTGCACTAT |
| <i>P. moii</i>                                 | GGAGAGGTTAG | TGTCAGAAAT | TAGAAGGTCC | GACTTAGAAC | CTTATTTGGG | GCTGCACTAT |
| <i>P. mollifolia</i>                           | GGAGAGGTTAG | TGTCAGAAAT | TAGAAGGTCT | GACTTAGAAC | CTTATTTGGG | GCTGCACTAT |
| <i>P. obtusidentata</i>                        | GGAGAGGTTAG | TGTCGGAAAT | TAGAAGGTCC | GACTTAGAAC | CTTATTTGGG | GCTGCACTAT |
| <i>P. orthandra</i>                            | GGAGAGGTTAG | TGTCAGAAAT | TAGAAGGTCC | GACTTAGAAC | CTTATTTGGG | GCTGCACTAT |
| <i>P. parvifolia</i>                           | GGAGAGGTTAG | TGTCAGAAAT | TAGAAGGTCC | GACTTAGAAC | CTTATTTGGG | GCTGCACTAT |
| <i>P. pinnatifida</i>                          | GGAGAGGTTAG | TGTCAGAAAT | TAGAAGGTCC | GACTTAGAAC | CTTATTTGGG | GCTGCACTAT |
| <i>P. pulchurifolia</i>                        | GGAGAGGTTAG | TGTCAGAAAT | TAGAAGGTCC | GACTTAGAAC | CTTATTTGGG | GCTGCACTAT |
| <i>P. renifolia</i>                            | GGAGAGGTTAG | TGTCAGAAAT | TAGAAGGTCT | GACTTAGAAC | CTTATTTGGG | GCTGCACTAT |
| <i>P. repanda</i>                              | GGAGAGGTTAG | TGTCAGAAAT | TAGAAGGTCC | GACTTAGAAC | CTTATTTGGG | GCTGCACTAT |
| <i>P. ronganensis</i>                          | GGAGAGGTTAG | TGTCAGAAAT | TAGAAGGTCT | GACTTAGAAC | CTTATTTGGG | GCTGCACTAT |
| <i>P. sclerophylla</i>                         | GGAGAGGTTAG | TGTCAGAAAT | TAGAAGGTCT | GACTTAGAAC | CTTATTTGGG | GCTGCACTAT |
| <i>P. sinensis</i>                             | GGAGAGGTTAG | TGTCAGAAAT | CAGAAGGTCC | GACTTAGAAC | CTTATTTGGG | GCTGCACTAT |
| <i>P. spinulosa</i>                            | GGAGAGGTTAG | TGTCAGAAAT | TAGAAGGTCC | GACTTAGAAC | CTTATTTGGG | GCTGCACTAT |
| <i>P. subrhomboida</i>                         | GGAGAGGTTAG | TGTCAGAAAT | TAGAAGGTCC | GACTTAGAGC | CTTATTTGGG | GCTGCACTAT |
| <i>P. subrhomboida</i> var. <i>tribract</i>    | GGAGAGGTTAG | TGTCAGAAAT | TAGAAGGTCC | GACTTAGAAC | CTTATTTGGG | GCTGCACTAT |
| <i>P. subulata</i>                             | GGAGAGGTTAG | TGTCAGAAAT | TAGAAGGTCC | GACTTAGAAC | CTTATTTGGG | GCTGCACTAT |
| <i>P. swinglei</i>                             | GGAGAGGTTAG | TGTCAGAGAT | TAGAAGGTCC | GACTTAGAAC | CTTATTTGGG | GCTGCACTAT |
| <i>P. tabacum</i>                              | GGAGAGGTTAG | TGTCAGAAAT | TAGAAGGTCC | GACTTAGAAC | CTTATTTGGG | GCTGCACTAT |
| <i>P. tenuifolia</i>                           | GGAGAGGTTAG | TGTCAGAAAT | TAGAAGGTCC | GACTTAGAGC | CTTATTTGGG | GCTGCACTAT |
| <i>P. tenuituba</i>                            | GGAGAGGTTAG | TGTCAGAAAT | TAGAAGGTCC | GACTTAGAAC | CTTATTTGGG | GCTGCACTAT |
| <i>P. tiandengensis</i>                        | GGAGAGGTTAG | TGTCAGAAAT | TAGAAGGTCT | GACTTAGAAC | CTTATTTGGG | GCTGCACTAT |
| <i>P. tribracteata</i>                         | GGAGAGGTTAG | TGTCAGAAAT | TAGAAGGTCT | GACTTAGAAC | CTTATTTGGG | GCTGCACTAT |
| <i>P. villosissima</i>                         | GGAGAGGTTGG | TGTCAGAAAT | TAGAAGGTCC | GACTTAGAAC | CTTATTTGGG | GCTGCACTAT |
| <i>P. wentsaii</i>                             | GGAGAGGTTAG | TGTCAGAAAT | TAGAAGGTCC | GACTTAGAAC | CTTATTTGGG | GCTGCACTAT |
| <i>P. xiuningensis</i>                         | GGAGAGGTTAG | TGTCAGAAAT | TAGAAGGTCC | GACTTAGAAC | CTTATTTGGG | GCTGCACTAT |
| <i>P. xizii</i>                                | GGAGAGGTTAG | TGTCAGAAAT | TAGAAGGTCC | GACTTAGAAC | CTTATTTGGG | GCTGCACTAT |
| <i>P. yangchunensis</i>                        | GGAGAGGTTGG | TGTCAGAAAT | TAGAAGGTCC | GACTTAGAAC | CTTATTTGGG | GCTGCACTAT |
| <i>P. yongxingensis</i>                        | GGAGAGGTTAG | TGTCAGAAAT | TAGAAGGTCC | GACTTAGAAC | CTTATTTGGG | GCTGCACTAT |
| <i>P. yungfuensis</i>                          | GGAGAGGTTAG | TGTCAGAAAT | TAGAAGGTCC | GACTTAGAAC | CTTATTTGGG | GCTGCACTAT |
| <i>P. cordifolia</i>                           | GGAGAGGTTAG | TGTCAGAAAT | TAGAAGGTCC | GACTTAGAAC | CTTATTTAGG | GCTGCACTAT |
| <i>P. danxiaensis</i>                          | GGAGAGGTTAG | TGTCAGAAAT | TAGAAGGTCC | GACTTAGAAC | CTTATTTGGG | GCTGCACTAT |
| <i>P. leiophylla</i> & <i>P. napoensis</i>     | GGAGAGGTTAG | TGTCAGAAAT | TAGAAGGTCT | GACTTAGAAC | CTTATTTGGG | GCTGCACTAT |
| <i>P. verecunda</i>                            | GGAGAGGTTAG | TGTCAGAAAT | TAGAAGGTCC | GACTTAGAGC | CTTATTTGGG | GCTGCACTAT |
| <i>sp. nov. 6</i>                              | GGAGAGGTTAG | TGTCAGAAAT | TAGAAGGTCT | GACTTAGAAC | CTTATTTGGG | GCTGCACTAT |
| <i>sp. nov. 8</i>                              | GGAGAGGTTAG | TGTCAGAAAT | TAGAAGGTCC | GACTTAGAAC | CTTATTTGGG | GCTGCACTAT |
| <i>sp. nov. 9</i>                              | GGAGAGGTTAG | TGTCAGAAAT | TAGAAGGTCC | GACTTAGAAC | CTTATTTGGG | GCTGCACTAT |
| <i>sp. nov. 10</i>                             | GGAGAGGTTAG | TGTCAGAAAT | TAGAAGGTCC | GACTTAGAAC | CTTATTTGGG | GCTGCACTAT |
| <i>sp. nov. 12</i>                             | GGAGAGGTTAG | TGTCAGAAAT | TAGAAGGTCC | GACTTAGAAC | CTTATTTGGG | GCTGCACTAT |
| <i>sp. nov. 13</i>                             | GGAGAGGTTAG | TGTCAGAAAT | TAGAAGGTCC | GACTTAGAAC | CTTATTTGGG | GCTGCACTAT |
| <i>sp. nov. 16</i>                             | GGAGAGGTTAG | TGTCAGAAAT | TAGAAGGTCC | GACTTAGAAC | CTTATTTGGG | GCTGCACTAT |
| <i>sp. nov. 18</i>                             | GGAGAGGTTGG | TGTCAGAAAT | TAGAAGGTCC | GACTTAGAAC | CTTATTTGGG | GCTGCACTAT |
| <i>sp. nov. 19</i>                             | GGAGAGGTTAG | TGTCAGAAAT | TAGAAGGTCC | GACTTAGAAC | CTTATTTGGG | GCTGCACTAT |
| <i>Didymocarpus hancei</i>                     | GGAGAGGTTAG | TGTCAGAAAT | TAGAAGGTCC | GACTTAGAAC | CTTATTTGGG | GCTGCACTAT |
| <i>Petrocodon dealbatus</i>                    | GGAGAGGTTAG | TGTCAGAAAT | TAGAAGGTCC | GACTTAGAAC | CTTATTTGGG | GCTGCACTAT |

|                                                | 730        | 740        | 750        | 760        | 770        | 780        |
|------------------------------------------------|------------|------------|------------|------------|------------|------------|
| <i>P. bicolor</i>                              | CCATCTACTG | ATATCCCTCA | AGCAGCCCGT | TTCTTGTTCA | TGCAGAACCG | TGTCAGAATG |
| <i>P. bipinnatifida</i>                        | CCATCTACTG | ATATCCCTCA | AGCAGCCCGT | TTCTTGTTCA | TGCAGAACCG | TGTCAGAATG |
| <i>P. chizhouensis</i>                         | CCATCTACTG | ATATCCCTCA | AGCAGCCCGT | TTCTTGTTCA | TGCAGAACCG | TGTCAGAATG |
| <i>P. cordata</i>                              | CCATCTACTG | ATATCCCTCA | AGCAGCCCGT | TTCTTGTTCA | TGCAGAACCG | TGTCAGAATG |
| <i>P. depressa</i>                             | CCATCTACTG | ATATCCCTCA | AGCAGCCCGT | TTCTTGTTCA | TGCAGAACCG | TGTCAGAATG |
| <i>P. dongguanica</i>                          | CCATCTACTG | ATATCCCTCA | AGCAGCCCGT | TTCTTGTTCA | TGCAGAACCG | TGTCAGAATG |
| <i>P. eburnea</i>                              | CCATCTACTG | ATATCCCTCA | AGCAGCCCGT | TTCTTGTTCA | TGCAGAACCG | TGTCAGAATG |
| <i>P. fimbrispala</i>                          | CCATCTACTG | ATATCCCTCA | AGCAGCCCGT | TTCTTGTTCA | TGCAGAACCG | TGTCAGAATG |
| <i>P. glandulosa</i> var. <i>yangshuoensis</i> | CCATCTACTG | ATATCCCTCA | AGCAGCCCGT | TTCTTGTTCA | TGCAGAACCG | TGTCAGAATG |
| <i>P. guelinensis</i> var. <i>brachycar</i>    | CCATCTACTG | ATATCCCTCA | AGCAGCCCGT | TTCTTGTTCA | TGCAGAACCG | TGTCAGAATG |
| <i>P. guihaiensis</i>                          | CCATCTACTG | ATATCCCTCA | AGCAGCCCGT | TTCTTGTTCA | TGCAGAACCG | TGTCAGAATG |
| <i>P. heterotricha</i> & <i>P. pterippoda</i>  | CCATCTACTG | ATATCCCTCA | AGCAGCCCGT | TTCTTGTTCA | TGCAGAACCG | TGTCAGAATG |
| <i>P. hochiensis</i>                           | CCATCTACTG | ATATCCCTCA | AGCAGCCCGT | TTCTTGTTCA | TGCAGAACCG | TGTCAGAATG |
| <i>P. huaijiensis</i>                          | CCATCTACTG | ATATCCCTCA | AGCAGCCCGT | TTCTTGTTCA | TGCAGAACCG | TGTCAGAATG |
| <i>P. langshanica</i>                          | CCATCTACTG | ATATCCCTCA | GGCAGCCCGT | TTCTTGTTCA | TGCAGAACCG | TGTCAGAATG |
| <i>P. latinervis</i>                           | CCATCTACTG | ATATCCCTCA | AGCAGCCCGT | TTCTTGTTCA | TGCAGAACCG | TGTCAGAATG |
| <i>P. laxiflora</i>                            | CCATCTACTG | ATATCCCTCA | AGCAGCCCGT | TTCTTGTTCA | TGCAGAACCG | TGTCAGAATG |
| <i>P. leprosa</i>                              | CCATCTACTG | ATATCCCTCA | AGCAGCCCGT | TTCTTGTTCA | TGCAGAACCG | TGTCAGAATG |
| <i>P. liguliformis</i>                         | CCATCTACTG | ATATCCCTCA | AGCAGCCCGT | TTCTTGTTCA | TGCAGAACCG | TGTCAGAATG |
| <i>P. lijiangensis</i>                         | CCATCTACTG | ATATCCCTCA | AGCAGCCCGT | TTCTTGTTCA | TGCAGAACCG | TGTCAGAATG |
| <i>P. linearifolia</i>                         | CCATCTACTG | ATATCCCTCA | AGCAGCCCGT | TTCTTGTTCA | TGCAGAACCG | TGTCAGAATG |
| <i>P. lobulata</i>                             | CCATCTACTG | ATATCCCTCA | AGCAGCCCGT | TTCTTGTTCA | TGCAGAACCG | TGTCAGAATG |
| <i>P. longii</i>                               | CCATCTACTG | ATATCCCTCA | AGCAGCCCGT | TTCTTGTTCA | TGCAGAACCG | TGTCAGAATG |
| <i>P. lunglinensis</i>                         | CCATCTACTG | ATATCCCTCA | AGCAGCCCGT | TTCTTGTTCA | TGCAGAACCG | TGTCAGAATG |
| <i>P. lungzhouensis</i>                        | CCATCTACTG | ATATCCCTCA | AGCAGCCCGT | TTCTTGTTCA | TGCAGAACCG | TGTCAGAATG |
| <i>P. luochengensis</i>                        | CCATCTACTG | ATATCCCTCA | AGCAGCCCGT | TTCTTGTTCA | TGCAGAACCG | TGTCAGAATG |
| <i>P. lutea</i>                                | CCATCTACTG | ATATCCCTCA | AGCAGCCCGT | TTCTTGTTCA | TGCAGAACCG | TGTCAGAATG |
| <i>P. mabaensis</i>                            | CCATCTACTG | ATATCCCTCA | AGCAGCCCGT | TTCTTGTTCA | TGCAGAACCG | TGTCAGAATG |
| <i>P. macrodonta</i>                           | CCATCTACTG | ATATCCCTCA | AGCAGCCCGT | TTCTTGTTCA | TGCAGAACCG | TGTCAGAATG |
| <i>P. medica</i>                               | CCATCTACTG | ATATCCCTCA | AGCAGCCCGT | TTCTTGTTCA | TGCAGAACCG | TGTCAGAATG |
| <i>P. moi</i>                                  | CCATCTACTG | ATATCCCTCA | AGCAGCCCGT | TTCTTGTTCA | TGCAGAACCG | TGTCAGAATG |
| <i>P. mollifolia</i>                           | CCATCTACTG | ATATCCCTCA | AGCAGCCCGT | TTCTTGTTCA | TGCAGAACCG | TGTCAGAATG |
| <i>P. obtusidentata</i>                        | CCATCTACTG | ATATCCCTCA | AGCAGCCCGT | TTCTTGTTCA | TGCAGAACCG | TGTCAGAATG |
| <i>P. orthandra</i>                            | CCATCTACTG | ATATCCCTCA | AGCAGCCCGT | TTCTTGTTCA | TGCAGAACCG | TGTCAGAATG |
| <i>P. parvifolia</i>                           | CCATCTACTG | ATATCCCTCA | AGCAGCCCGT | TTCTTGTTCA | TGCAGAACCG | TGTCAGAATG |
| <i>P. pinnatifida</i>                          | CCATCTACTG | ATATCCCTCA | AGCAGCCCGT | TTCTTGTTCA | TGCAGAACCG | TGTCAGAATG |
| <i>P. pulchurifolia</i>                        | CCATCTACTG | ATATCCCTCA | AGCAGCCCGT | TTCTTGTTCA | TGCAGAACCG | TGTCAGAATG |
| <i>P. renifolia</i>                            | CCATCTACTG | ATATCCCTCA | AGCAGCCCGT | TTCTTGTTCA | TGCAGAACCG | TGTCAGAATG |
| <i>P. repanda</i>                              | CCATCTACTG | ATATCCCTCA | AGCAGCCCGT | TTCTTGTTCA | TGCAGAACCG | TGTCAGAATG |
| <i>P. ronganensis</i>                          | CCATCTACTG | ATATCCCTCA | AGCAGCCCGT | TTCTTGTTCA | TGCAGAACCG | TGTCAGAATG |
| <i>P. sclerophylla</i>                         | CCATCTACTG | ATATCCCTCA | AGCAGCCCGT | TTCTTGTTCA | TGCAGAACCG | TGTCAGAATG |
| <i>P. sinensis</i>                             | CCATCTACTG | ATATCCCTCA | AGCAGCCCGT | TTCTTGTTCA | TGCAGAACCG | TGTCAGAATG |
| <i>P. spinulosa</i>                            | CCATCTACTG | ATATCCCTCA | AGCAGCCCGT | TTCTTGTTCA | TGCAGAACCG | TGTCAGAATG |
| <i>P. subrhomboidea</i>                        | CCATCTACTG | ATATCCCTCA | AGCAGCCCGT | TTCTTGTTCA | TGCAGAACCG | TGTCAGAATG |
| <i>P. subrhomboidea</i> var. <i>tribract</i>   | CCATCTACTG | ATATCCCTCA | AGCAGCCCGT | TTCTTGTTCA | TGCAGAACCG | TGTCAGAATG |
| <i>P. subulata</i>                             | CCATCTACTG | ATATCCCTCA | AGCAGCCCGT | TTCTTGTTCA | TGCAGAACCG | TGTCAGAATG |
| <i>P. swinglei</i>                             | CCATCTACTG | ATATCCCTCA | AGCAGCCCGT | TTCTTGTTCA | TGCAGAACCG | TGTCAGAATG |
| <i>P. tabacum</i>                              | CCATCTACTG | ATATCCCTCA | AGCAGCCCGT | TTCTTGTTCA | TGCAGAACCG | TGTCAGAATG |
| <i>P. tenuifolia</i>                           | CCATCTACTG | ATATCCCTCA | AGCAGCCCGT | TTCTTGTTCA | TGCAGAACCG | TGTCAGAATG |
| <i>P. tenuituba</i>                            | CCATCTACTG | ATATCCCTCA | AGCAGCCCGT | TTCTTGTTCA | TGCAGAACCG | TGTCAGAATG |
| <i>P. tiandengensis</i>                        | CCATCTACTG | ATATCCCTCA | AGCAGCCCGT | TTCTTGTTCA | TGCAGAACCG | TGTCAGAATG |
| <i>P. tribracteata</i>                         | CCATCTACTG | ATATCCCTCA | AGCAGCCCGT | TTCTTGTTCA | TGCAGAACCG | TGTCAGAATG |
| <i>P. villosissima</i>                         | CCATCTACTG | ATATCCCTCA | AGCAGCCCGT | TTCTTGTTCA | TGCAGAACCG | TGTCAGAATG |
| <i>P. wentsai</i>                              | CCATCTACTG | ATATCCCTCA | AGCAGCCCGT | TTCTTGTTCA | TGCAGAACCG | TGTCAGAATG |
| <i>P. xiuningensis</i>                         | CCATCTACTG | ATATCCCTCA | AGCAGCCCGT | TTCTTGTTCA | TGCAGAACCG | TGTCAGAATG |
| <i>P. xizii</i>                                | CCATCTACTG | ATATCCCTCA | AGCAGCCCGT | TTCTTGTTCA | TGCAGAACCG | TGTCAGAATG |
| <i>P. yangchunensis</i>                        | CCATCTACTG | ATATCCCTCA | AGCAGCCCGT | TTCTTGTTCA | TGCAGAACCG | TGTCAGAATG |
| <i>P. yongxingensis</i>                        | CCATCTACTG | ATATCCCTCA | AGCAGCCCGT | TTCTTGTTCA | TGCAGAACCG | TGTCAGAATG |
| <i>P. yunghuensis</i>                          | CCATCTACTG | ATATCCCTCA | AGCAGCCCGT | TTCTTGTTCA | TGCAGAACCG | TGTCAGAATG |
| <i>P. cordifolia</i>                           | CCATCTACTG | ATATCCCTCA | AGCAGCCCGT | TTCTTGTTCA | TGCAGAACCG | TGTCAGAATG |
| <i>P. danxiaensis</i>                          | CCATCTACTG | ATATCCCTCA | AGCAGCCCGT | TTCTTGTTCA | TGCAGAACCG | TGTCAGAATG |
| <i>P. leiophylla</i> & <i>P. napoensis</i>     | CCATCTACTG | ATATCCCTCA | AGCAGCCCGT | TTCTTGTTCA | TGCAGAACCG | TGTCAGAATG |
| <i>P. verecunda</i>                            | CCATCTACTG | ATATCCCTCA | AGCAGCCCGT | TTCTTGTTCA | TGCAGAACCG | TGTCAGAATG |
| <i>sp. nov. 6</i>                              | CCATCTACTG | ATATCCCTCA | AGCAGCCCGT | TTCTTGTTCA | TGCAGAACCG | TGTCAGAATG |
| <i>sp. nov. 8</i>                              | CCATCTACTG | ATATCCCTCA | AGCAGCCCGT | TTCTTGTTCA | TGCAGAACCG | TGTCAGAATG |
| <i>sp. nov. 9</i>                              | CCATCTACTG | ATATCCCTCA | AGCAGCCCGT | TTCTTGTTCA | TGCAGAACCG | TGTCAGAATG |
| <i>sp. nov. 10</i>                             | CCATCTACTG | ATATCCCTCA | AGCAGCCCGT | TTCTTGTTCA | TGCAGAACCG | TGTCAGAATG |
| <i>sp. nov. 12</i>                             | CCATCTACTG | ATATCCCTCA | AGCAGCCCGT | TTCTTGTTCA | TGCAGAACCG | TGTCAGAATG |
| <i>sp. nov. 13</i>                             | CCATCTACTG | ATATCCCTCA | AGCAGCCCGT | TTCTTGTTCA | TGCAGAACCG | TGTCAGAATG |
| <i>sp. nov. 16</i>                             | CCATCTACTG | ATATCCCTCA | AGCAGCCCGT | TTCTTGTTCA | TGCAGAACCG | TGTCAGAATG |
| <i>sp. nov. 18</i>                             | CCATCTACTG | ATATCCCTCA | AGCAGCCCGT | TTCTTGTTCA | TGCAGAACCG | TGTCAGAATG |
| <i>sp. nov. 19</i>                             | CCATCTACTG | ATATCCCTCA | AGCAGCCCGT | TTCTTGTTCA | TGCAGAACCG | TGTCAGAATG |
| <i>Didymocarpus hancei</i>                     | CCATCTACTG | ATATCCCTCA | AGCAGCCCGT | TTCTTGTTCA | TGCAGAACCG | TGTCAGAATG |
| <i>Petrocodon dealbatus</i>                    | CCATCTACTG | ATATCCCTCA | AGCAGCCCGT | TTCTTGTTCA | TGCAGAACCG | TGTCAGAATG |



|                                                | ..... ..... | ..... ..... |   |
|------------------------------------------------|-------------|-------------|---|
| <i>P. bicolor</i>                              | CTCTGCTTGG  | TTAATTCTAC  | C |
| <i>P. bipinnatifida</i>                        | CTTTGCTTGG  | GTAATTCTAC  | C |
| <i>P. chizhouensis</i>                         | CTTTGCTTGG  | TTAATTCTAC  | C |
| <i>P. cordata</i>                              | CTTTGCTTGG  | TTAATTCTAC  | C |
| <i>P. depressa</i>                             | CTTTGCTTGG  | TTAATTCTAC  | C |
| <i>P. dongguanica</i>                          | CTTTGCTTGG  | TTAATTCTAC  | C |
| <i>P. eburnea</i>                              | CTTTGCTTGG  | TTAATTCTAC  | C |
| <i>P. fimbrisejala</i>                         | CTTTGCTTGG  | TTAATTCTAC  | C |
| <i>P. glandulosa</i> var. <i>yangshuoensis</i> | CTTTGCTTGG  | TTAATTCTAC  | C |
| <i>P. guilinensis</i> var. <i>brachycar</i>    | CTTTGCTTGG  | TTAATTCTAC  | C |
| <i>P. guihaiensis</i>                          | CTTTGCTTGG  | TTAATTCTAC  | C |
| <i>P. heterotricha</i> & <i>P. pterippoda</i>  | CTTTGCTTGA  | TTAATTCTAC  | C |
| <i>P. hochiensis</i>                           | CTTTGCTTGG  | TTAATTCTAC  | C |
| <i>P. huaijiensis</i>                          | CTTTGCTTGG  | TTAATTCTAC  | C |
| <i>P. langshanica</i>                          | CTTTGCTTGG  | TTAATTCTAC  | C |
| <i>P. latinervis</i>                           | CTTTGCTTGG  | TTAATTCTAC  | C |
| <i>P. laxiflora</i>                            | CTTTGCTTGG  | TTAATTCTAC  | C |
| <i>P. leprosa</i>                              | CTTTGCTTGG  | TTAATTCTAC  | C |
| <i>P. liguliformis</i>                         | CTTTGCTTGG  | TTAATTCTAC  | C |
| <i>P. lijiangensis</i>                         | CTTTGCTTGG  | TTAATTCTAC  | C |
| <i>P. linearifolia</i>                         | CTTTGCTTGG  | TTAATTCTAC  | C |
| <i>P. lobulata</i>                             | CTTTGCTTGG  | TTAATTCTAC  | C |
| <i>P. longii</i>                               | CTTTGCTTGG  | TTAATTCTAC  | C |
| <i>P. lunglinensis</i>                         | CTTTGCTTGG  | TTAATTCTAC  | C |
| <i>P. lungzhouensis</i>                        | CTTTGCTTGG  | TTAATTCTAC  | C |
| <i>P. luochengensis</i>                        | CTTTGCTTGG  | TTAATTCTAC  | C |
| <i>P. lutea</i>                                | CTTTGCTTGG  | TTAATTCTAC  | C |
| <i>P. mabaensis</i>                            | CTTTGCTTGG  | TTAATTCTAC  | C |
| <i>P. macrodonta</i>                           | CTTTGCTTGG  | TTAATTCTAC  | C |
| <i>P. medica</i>                               | CTTTGCTTGG  | TTAATTCTAC  | C |
| <i>P. moii</i>                                 | CTTTGCTTGG  | TTAATTCTAC  | C |
| <i>P. mollifolia</i>                           | CTTTGCTTGG  | TTAATTCTAC  | C |
| <i>P. obtusidentata</i>                        | CTTTGCTTGG  | TTAATTCTAC  | C |
| <i>P. orthandra</i>                            | CTTTGCTTGG  | TTAATTCTAC  | C |
| <i>P. parvifolia</i>                           | CTTTGCTTGG  | TTAATTCTAC  | C |
| <i>P. pinnatifida</i>                          | CTTTGCTTGG  | TTAATTCTAC  | C |
| <i>P. pulchurifolia</i>                        | CTTTGCTTGG  | TTAATTCTAC  | C |
| <i>P. renifolia</i>                            | CTTTGCTTGG  | TTAATTCTAC  | C |
| <i>P. repanda</i>                              | CTTTGCTTGG  | TTAATTCTAC  | C |
| <i>P. ronganensis</i>                          | CTTTGCTTGG  | TTAATTCTAC  | C |
| <i>P. sclerophylla</i>                         | CTTTGCTTGG  | TTAATTCTAC  | C |
| <i>P. sinensis</i>                             | CTTTGCTTGG  | TTAATTCTAC  | C |
| <i>P. spinulosa</i>                            | CTTTGCTTGG  | TTAATTCTAC  | C |
| <i>P. subrhomboidea</i>                        | CTTTGCTTGG  | TTAATTCTAC  | C |
| <i>P. subrhomboidea</i> var. <i>tribract</i>   | CTTTGCTTGG  | TTAATTCTAC  | C |
| <i>P. subulata</i>                             | CTTTGCTTGG  | TTAATTCTAC  | C |
| <i>P. swinglei</i>                             | CTTTGCTTGG  | TTAATTCTAC  | C |
| <i>P. tabacum</i>                              | CTTTGCTTGG  | TTAATTCTAC  | C |
| <i>P. tenuifolia</i>                           | CTTTGCTTGG  | TTAATTCTAC  | C |
| <i>P. tenuituba</i>                            | CTTTGCTTGG  | TTAATTCTAC  | C |
| <i>P. tiandengensis</i>                        | CTTTGCTTGG  | TTAATTCTAC  | C |
| <i>P. tribracteata</i>                         | CTTTGCTTGG  | TTAATTCTAC  | C |
| <i>P. villosissima</i>                         | CTTTGCTTGG  | TTAATTCTAC  | C |
| <i>P. wentsaii</i>                             | CTTTGCTTGG  | TTAATTCTAC  | C |
| <i>P. xiuningensis</i>                         | CTTTGCTTGG  | TTAATTCTAC  | C |
| <i>P. xizii</i>                                | CTTTGCTTGG  | TTAATTCTAC  | C |
| <i>P. yangchunensis</i>                        | CTTTGCTTGG  | TTAATTCTAC  | C |
| <i>P. yongxingensis</i>                        | CTTTGCTTGG  | TTAATTCTAC  | C |
| <i>P. yungfuensis</i>                          | CTTTGCTTGG  | TTAATTCTAC  | C |
| <i>P. cordifolia</i>                           | CTTTGCTTGG  | TTAATTCTAC  | C |
| <i>P. danxiaensis</i>                          | CTTTGCTTGG  | TTAATTCTAC  | C |
| <i>P. leiophylla</i> & <i>P. napoensis</i>     | CTTTGCTTGG  | TTAATTCTAC  | C |
| <i>P. verecunda</i>                            | CTTTGCTTGG  | TTAATTCTAC  | C |
| <i>sp. nov. 6</i>                              | CTTTGCTTGG  | TTAATTCTAC  | C |
| <i>sp. nov. 8</i>                              | CTTTGCTTGG  | TTAATTCTAC  | C |
| <i>sp. nov. 9</i>                              | CTTTGCTTGG  | TTAATTCTAC  | C |
| <i>sp. nov. 10</i>                             | CTTTGCTTGG  | TTAATTCTAC  | C |
| <i>sp. nov. 12</i>                             | CTTTGCTTGG  | TTAATTCTAC  | C |
| <i>sp. nov. 13</i>                             | CTTTGCTTGG  | TTAATTCTAC  | C |
| <i>sp. nov. 16</i>                             | CTTTGCTTGG  | TTAATTCTAC  | C |
| <i>sp. nov. 18</i>                             | CTTTGCTTGG  | TTAATTCTAC  | C |
| <i>sp. nov. 19</i>                             | CTTTGCTTGG  | TTAATTCTAC  | C |
| <i>Didymocarpus hancei</i>                     | CTTTGCTTGG  | TTAATTCTAC  | C |
| <i>Petrocodon dealbatus</i>                    | CTTTGCTTAG  | TTAATTCTAC  | C |
