# Supplementary material for: Adaptive Molecular Evolution of PHYE in Primulina, a Karst Cave Plant
Source: PubMed Central journal article supplement (PMC4452542; doi:10.1371/journal.pone.0127821), 2015-06-01
Supplement: pone.0127821.s003.pdf [file pone.0127821.s003.pdf]

### S3. Alignment of 10 full-length sequences of *PHYE*.

|                       | 10                  | 20                  | 30                  | 40                  | 50                  |
|-----------------------|---------------------|---------------------|---------------------|---------------------|---------------------|
| <i>P.eburnea</i>      | A T G G A G T T A G | A A A C C G A A T A | T G G T A A A A A C | T C G A C A G C C A | C A A A T C G A A A |
| <i>P.fimbrisejala</i> | A T G G A G T T A G | A A A C C G A A T A | T G G T A A A A A C | T C G A C A G C C A | C A A A T C G A A A |
| <i>P.heterotricha</i> | A T G G A A T T A G | A A A C C G A A A A | T G G T A A A A A C | C C G A C A G C C A | C A A A T C G A A A |
| <i>P.huaijiensis</i>  | A T G G A G T T A G | A A A C C G A A T A | T G G T A A A A A C | T C G A C A G C C A | C A A A T C G A A A |
| <i>P.lutea</i>        | A T G G A G T T A G | A A A C C G A A T A | T G G T A A A A A C | T C G A C A G C C A | C A A A T C G A A A |
| <i>P.pteropoda</i>    | A T G G A G T T A G | A A A C C G A A A A | T G G T A A A A A C | C C G A C A G C C A | C A A A T C G A A A |
| <i>P.sinensis</i>     | A T G G A G C T A G | A A A C C G A A T A | T G G T C A G A A C | T C G A C A G C C A | C A A A T C G A A A |
| <i>P.swinglei</i>     | A T G G A G T T A G | A A A C C G A A A A | T G G T A A A A A C | C C G A C A G C C A | C A A A T C G A A A |
| <i>P.tabacum</i>      | A T G G A G T T A G | A A A C C G A A T A | T G G T A A A A A C | T C G A C A G C C A | C A A A T C G A A A |
| <i>P.villosissima</i> | A T G G A G T T A G | A A A C C G A A T A | T G G T A A A A A C | T C G A C A G C C A | C A A A T C G A A A |

  

|                       | 60                  | 70                  | 80                  | 90                  | 100                 |
|-----------------------|---------------------|---------------------|---------------------|---------------------|---------------------|
| <i>P.eburnea</i>      | A T T G G A C G A A | A G C A A G G G A A | A A A A T A A C G C | C G C C A A C A C T | G T T T T G T C A T |
| <i>P.fimbrisejala</i> | A T T G G A C G A A | A G C A C G G G A A | A A A A T A A C G C | C T C C A A C A C T | G T T T T G T C A T |
| <i>P.heterotricha</i> | A T T C G A C G A A | A G C A A G G G A A | A A A A T A A C G A | C G C C A A C A C T | G T T T T G T C A T |
| <i>P.huaijiensis</i>  | A T T G G A C G A A | A G C A A G G G A A | A A A A T A A C G C | C G C C A A C A C T | G T T T T G T C A T |
| <i>P.lutea</i>        | A T T G G A C G A A | A G C A A G G G A A | A A A A T A A C G C | C G C C A A C A C T | G T T T T G T C A T |
| <i>P.pteropoda</i>    | A T T C G A C G A A | A G C A A G G G A A | A A A A T A A C G T | C G C C A A C A C T | G T T T T G T C A T |
| <i>P.sinensis</i>     | A T T G C A C G A A | A G C A A G G G A A | A A A A T A A C G C | C A C C A A C A C T | G T T T T G T C A T |
| <i>P.swinglei</i>     | A T T G G A C G A A | A G C A A G G G A A | A A A A T A G C G T | C G C C A A C A C T | G T T T T G T C A T |
| <i>P.tabacum</i>      | A T T G G A C G A A | A G C A A G G G A A | A A A A T A A C G C | T A C C A A C G T   | G T T T T G T C A T |
| <i>P.villosissima</i> | A T T A G A C G A A | A G C A A G G G A A | A A A A T A A C G C | C T C C A A C A C T | G T T T T G T C A T |

  

|                       | 110                 | 120                 | 130                 | 140                 | 150                 |
|-----------------------|---------------------|---------------------|---------------------|---------------------|---------------------|
| <i>P.eburnea</i>      | C C T C T G C T G C | T A G C A A C A T G | A A C A A C A A C A | G A G C T A T G G C | T C A G T A C A A T |
| <i>P.fimbrisejala</i> | C C T C T G C T G C | T A G C A A C A T G | A A C A C C A A C A | G A G C T A T G G C | T C A A T A C A A T |
| <i>P.heterotricha</i> | C C T C T G C T G C | T A G C A A C A T G | A A C A C C A A C A | G A G C A T G G T   | T C A G T A C A A T |
| <i>P.huaijiensis</i>  | C C T C T G C T G C | T A G C A A C A T G | A A C A C C A A C A | G A G C T A T G G C | T C A G T A C A A T |
| <i>P.lutea</i>        | T C T C T G C T G C | T A G C A A C A T G | A A C A C C A A C A | G A G C T A T G G C | T C A G T A C A A T |
| <i>P.pteropoda</i>    | C C T C T G C T G C | T A G C A A C A T G | A A C A C C A A C A | G A A C C A T G G T | T C A G T A C A A T |
| <i>P.sinensis</i>     | C C T C T G C T G C | T A G C A A C A T G | A A C A C C A A C A | G A G C T A T G G C | T C A G T A C A A T |
| <i>P.swinglei</i>     | C C T C T G C T G C | A A G C A A C A T G | A A C A C C A A C A | G A G C T A T G G C | T C A G T A C A A T |
| <i>P.tabacum</i>      | C C T C T G C T G C | T A G C A A C A T G | A A C A C C A A C A | G A G C T A T G G C | T C A G T A C A A T |
| <i>P.villosissima</i> | C C T C T G C T G C | T A G C A A C A T G | A A C A C C A A C A | G A G C T A T G G C | T C A G T A C A A T |

  

|                       | 160                 | 170                 | 180                 | 190                 | 200                 |
|-----------------------|---------------------|---------------------|---------------------|---------------------|---------------------|
| <i>P.eburnea</i>      | G C C G A T G C G A | G G C T G A T G G C | T G A A T T T G A G | C A G T C C G G T A | A G T C T G G T A A |
| <i>P.fimbrisejala</i> | G C C G A T G C G A | G G C T G A T G G C | T G A A T T T G A G | C A G T C C G G T A | A G T C T G G T A A |
| <i>P.heterotricha</i> | G C C G A T G C G A | G G C T G A T G G C | T G A A T T T G A G | C A G T C C G G T A | A G T C G G T A A   |
| <i>P.huaijiensis</i>  | G C C G A T G C G A | G G C T G A T G G C | T G A A T T T G A G | C A G T C C G G T A | A G T C T G G T A A |
| <i>P.lutea</i>        | G C C G A T G C G A | G G C T G A T G G C | T G A A T T T G A G | C A G T C T G G T A | A G T C T G G T A A |
| <i>P.pteropoda</i>    | G C C G A T G C G A | G G C T G A T G G C | T G A A T T T G A G | C A G T C C G G T A | A G T C G G G T A A |
| <i>P.sinensis</i>     | G C C G A T G C G A | G G C T G A T G G C | T G A A T T T G A G | C A G T C C G G T A | A G T C T G G T A A |
| <i>P.swinglei</i>     | G C C G A T G C G A | G G C T G A T G G C | T G A A T T T G A G | C A G T C C G G T A | A G T C A G G T A A |
| <i>P.tabacum</i>      | G C C G A T G C G A | G G C T G A T G G C | T G A A T T T G A G | C A G T C T G G T A | A G T C T G G T A A |
| <i>P.villosissima</i> | G C C G A T G C G A | G G C T G A T G G C | T G A A T T T G A G | C A G T C C G G T A | A G T C T G G T A A |

  

|                       | 210                 | 220                 | 230                 | 240                 | 250                 |
|-----------------------|---------------------|---------------------|---------------------|---------------------|---------------------|
| <i>P.eburnea</i>      | G T T C T T T A A C | T A C T C A A A G T | C A G T T T C T C A | T G C T C C G A A T | A C T T T G A G C A |
| <i>P.fimbrisejala</i> | G T T C T T T A A C | T A C T C A A A G T | C A G T T T C T C A | T G C T C C G A A T | A C T T T G A G C A |
| <i>P.heterotricha</i> | G T T C T T T A A C | T A C T C G A A G T | C A G T T T C T C A | T G C T C C G A A T | A C T T T G A G C A |
| <i>P.huaijiensis</i>  | G T T C T T T A A C | T A C T C A A A G T | C A G T T T C T C A | T G C T C C G A A T | A C T T T G A G C A |
| <i>P.lutea</i>        | G T T C T T T A A C | T A C T C A A A G T | C A G T T T C T C A | T G C T C C G A A T | A C T T T G A G C A |
| <i>P.pteropoda</i>    | G T T C T T T A A C | T A C T C A A A G T | C A G T T T C T C A | T G C T C C G A A T | A C T T T G A G C A |
| <i>P.sinensis</i>     | G T T C T T T A A C | T A C T C T A A G T | C A G T T T C T C A | T G C T C C G A A T | A C T T T G A G C A |
| <i>P.swinglei</i>     | G T T C T T T A A C | T A C T C G A A G T | C A G T T T C T C A | T G C T C C C A A T | A C T T T G A G C A |
| <i>P.tabacum</i>      | G T T C T T T A A C | T A C T C A A A G T | C A G T T T C T C A | T G C T C C G A A T | A C T T T G A G C A |
| <i>P.villosissima</i> | G T T C T T T A A C | T A C T C A A A G T | C A G T T T C T C A | T G C T C C G A A T | A C T T T G A G C A |

  

|                       | 260                 | 270                 | 280                 | 290                 | 300                 |
|-----------------------|---------------------|---------------------|---------------------|---------------------|---------------------|
| <i>P.eburnea</i>      | C T G A G G A G G A | G A T G A C T G C T | T A T T T G T C G A | A A A T C C A G A G | G G G G A G T C T T |
| <i>P.fimbrisejala</i> | C T G A G G A G G A | G A T G A T T G C T | T A T T T G T C G A | A A A T C C A G A G | G G G G A G T C T T |
| <i>P.heterotricha</i> | C T G A G G A G G A | G A T G A C T G C T | T A T T T G T C G A | A A A T C C A G A G | G G G G A G T C T T |
| <i>P.huaijiensis</i>  | C T G A G G A G G A | G A T G A C T G C T | T A T T T G T C G A | A A A T C C A G A G | G G G G A G T C T T |
| <i>P.lutea</i>        | C T G A G G A G G A | G A T G A C T G C T | T A T T T G T C G A | A A A T C C A G A G | G G G G A G T C T T |
| <i>P.pteropoda</i>    | C T G A G G A G G A | G A T G A C T G C T | T A T T T G T C G A | A A A T C C A G A G | G G G G A G T C T T |
| <i>P.sinensis</i>     | C T G A G G A G G A | G A T G A C T G C T | T A T T T G T C G A | A A A T C C A G A G | G G G G A G T C T T |
| <i>P.swinglei</i>     | C T G A G G A G G A | G A T G A C T G C T | T A T T T G T C G A | A A A T C C A G A G | G G G A A G T C T T |
| <i>P.tabacum</i>      | C T G A G G A G G A | G A T G A C T G C T | T A T T T G T C G A | A A A T C C A G A G | G G G G A G T C T T |
| <i>P.villosissima</i> | C T G A G G A G G A | G A T G A T T G C T | T A T T T G T C G A | A A A T C C A G A G | G G G G A G T C T T |



|                       | 610        | 620        | 630        | 640        | 650        |
|-----------------------|------------|------------|------------|------------|------------|
| <i>P.eburnea</i>      | GAGCCAGCTC | GTGCTTGTGA | TCCTGCTATG | TTGCATGCTA | GTGCTGTGCA |
| <i>P.fimbrisejala</i> | GAGCCAGCTC | GTGCTTGTGA | TCCTGCTATG | TTGCATGCTA | GTGCTGTGCA |
| <i>P.heterotricha</i> | GAGCCAGCTC | GTGCTTGTGA | TCCTGCTATG | TTGCATGCTA | GTGCTGTGCA |
| <i>P.huaijiensis</i>  | GAGCCAGCTC | GTGCTTGTGA | TCCTGCTATG | TTGCATGCTA | GTGCTGTGCA |
| <i>P.lutea</i>        | GAGCCAGCTC | GTGCTTGTGA | TCCTGCTATG | TTGCATGCTA | GTGCTGTGCA |
| <i>P.pteropoda</i>    | GAGCCAGCTC | GTGCTTGTGA | TCCTGCTATG | TTGCATGCTA | GTGCTGTGCA |
| <i>P.sinensis</i>     | GAGCCAGCTC | GTGCTTGTGA | TCCTGCTATG | TTGCATGCTA | GTGCTGTACA |
| <i>P.swinglei</i>     | GAGCCAGCTC | GTGCTTGTGA | TCCTTCTATG | TTGCATGCTA | GTGCTGTGCA |
| <i>P.tabacum</i>      | GAGCCAGCTC | GTGCTTGTGA | TCCTGCTATG | TTGCATGCTA | GTGCTGTGCA |
| <i>P.villosissima</i> | GAGCCAGCTC | GTGCTTGTGA | TCCTGCTATG | TTGCATGCTA | GTGCTGTGCA |

|                       | 660        | 670        | 680        | 690        | 700         |
|-----------------------|------------|------------|------------|------------|-------------|
| <i>P.eburnea</i>      | ATCGCAGAAA | CTAGCTGTGA | GAGCCATATC | TAGGCTGCAG | TCTCTTCCCTG |
| <i>P.fimbrisejala</i> | ATCGCAGAAA | CTAGCTGTGA | GAGCCATATC | TAGGCTGCAG | TCTCTTCCCTG |
| <i>P.heterotricha</i> | ATCGCAGAAA | CTAGCCGTGA | GAGCCATATC | TAGGCTGCAG | TCTCTTCCCTG |
| <i>P.huaijiensis</i>  | ATCGCAGAAA | CTAGCTGTGA | GAGCCATATC | TAGGCTGCAG | GCTCTTCCCTG |
| <i>P.lutea</i>        | ATCGCAGAAA | CTAGCTGTGA | GAGCCATATC | TAGGCTGCAG | TCTCTTCCCTG |
| <i>P.pteropoda</i>    | ATCGCAGAAA | CTAGCCGTGA | GAGCCATATC | TAGGCTGCAG | TCTCTTCCCTG |
| <i>P.sinensis</i>     | ATCGCAGAAA | CTAGCTGTGA | GAGCCATATC | TAGGCTGCAG | TCTCTTCCCTG |
| <i>P.swinglei</i>     | ATCGCAGAAA | CTAGCTGTGA | GAGCCATATC | TAGGCTGCAG | TCTCTTCCCTG |
| <i>P.tabacum</i>      | ATCGCAGAAA | CTAGCTGTGA | GAGCCATATC | TAGGCTGCAG | TCTCTTCCCTG |
| <i>P.villosissima</i> | ATCGCAGAAA | CTAGCTGTGA | GAGCCATATC | TAGGCTGCAG | TCTCTTCCCTG |

|                       | 710        | 720        | 730        | 740        | 750        |
|-----------------------|------------|------------|------------|------------|------------|
| <i>P.eburnea</i>      | GGGGCGATGT | AGGAGTTTTG | TGTGATACAG | TCGTAGAAGA | TGTCCAAAAA |
| <i>P.fimbrisejala</i> | GGGGCGATGT | TGGAGTTTTG | TGTGATACAG | TCGTAGAAGA | TGTCCAAAAA |
| <i>P.heterotricha</i> | GGGGCGATGT | AGGAGTTTTG | TGTGATACAG | TCGTAGAAGA | TATCCAAAAA |
| <i>P.huaijiensis</i>  | GGGGCGATGT | AGGAGTTTTG | TGTGATACAG | TCGTAGAAGA | TGTCCAAAAA |
| <i>P.lutea</i>        | GGGGCGATGT | AGGAGTTTTG | TGTGATACAG | TCGTAGAAGA | TGTCCAAAAA |
| <i>P.pteropoda</i>    | GGGGCGATGT | AGGAGTTTTG | TGTGATACAG | TCGTAGAAGA | TATCCAAAAA |
| <i>P.sinensis</i>     | GGGGCGATGT | AGGAGTTTTG | TGTGATACAG | TCGTAGAAGA | TGTCCAAAAA |
| <i>P.swinglei</i>     | GGGGCGATGT | AGGAGTTTTG | TGTGATACAG | TCGTAGAAGA | TGTCCAAAAA |
| <i>P.tabacum</i>      | GGGGCGATGT | AGGAGTTTTG | TGTGATACAG | TCGTAGAAGA | TGTCCAAAAA |
| <i>P.villosissima</i> | GGGGCGATGT | AGGAGTTTTG | TGTGATACAG | TCGTAGAAGA | TGTCCAAAAA |

|                       | 760        | 770        | 780        | 790        | 800        |
|-----------------------|------------|------------|------------|------------|------------|
| <i>P.eburnea</i>      | CTTACTGGTT | ATGATAGGGT | TATGGTGTAT | AAGTTCCATG | AAGATAATCA |
| <i>P.fimbrisejala</i> | CTTACTGGTT | ATGATAGGGT | TATGGTGTAT | AAGTTCCATG | AAGATAATCA |
| <i>P.heterotricha</i> | CTTACTGGTT | ATGATAGGGT | TATGGTGTAT | AAGTTCCATG | AAGATAATCA |
| <i>P.huaijiensis</i>  | CTTACTGGTT | ATGATAGGGT | TATGGTGTAT | AAGTTCCATG | AAGATAATCA |
| <i>P.lutea</i>        | CTTACTGGTT | ATGATAGGGT | TATGGTGTAT | AAGTTCCATG | AAGATAATCA |
| <i>P.pteropoda</i>    | CTTACTGGTT | ATGATAGGGT | TATGGTGTAT | AAGTTCCATG | AAGATAATCA |
| <i>P.sinensis</i>     | CTTACTGGTT | ATGATAGGGT | TATGGTGTAT | AAGTTCCATG | AAGATAATCA |
| <i>P.swinglei</i>     | CTTACTGGTT | ATGACAGGGT | TATGGTGTAT | AAGTTCCATG | AAGATAATCA |
| <i>P.tabacum</i>      | CTTACTGGTT | ATGATAGGGT | TATGGTGTAT | AAGTTCCATG | AAGATAATCA |
| <i>P.villosissima</i> | CTTACTGGTT | ATGATAGGGT | TATGGTGTAT | AAGTTCCATG | AAGATAATCA |

|                       | 810        | 820        | 830        | 840        | 850        |
|-----------------------|------------|------------|------------|------------|------------|
| <i>P.eburnea</i>      | TGGAGAGGTA | GTGTCAGAAA | TTAGAAGGTC | CGACTTAGAA | CCTTATTTGG |
| <i>P.fimbrisejala</i> | TGGAGAGGTA | GTGTCAGAAA | TTAGAAGGTC | CGACTTAGAG | CCTTATTTGG |
| <i>P.heterotricha</i> | TGGAGAGGTA | GTGTCAGAAA | TTAGAAGGTC | CGACTTAGAA | CCTTATTTGG |
| <i>P.huaijiensis</i>  | TGGAGAGGTA | GTGTCAGAAA | TTAGAAGGTC | CGACTTAGAA | CCTTATTTGG |
| <i>P.lutea</i>        | TGGAGAGGTA | GTGTCAGAAA | TTAGAAGGTC | CGACTTAGAA | CCTTATTTGG |
| <i>P.pteropoda</i>    | TGGAGAGGTA | GTGTCAGAAA | TTAGAAGGTC | CGACTTAGAA | CCTTATTTGG |
| <i>P.sinensis</i>     | TGGAGAGGTA | GTGTCAGAAA | TTAGAAGGTC | CGACTTAGAA | CCTTATTTGG |
| <i>P.swinglei</i>     | TGGAGAGGTA | GTGTCAGAGA | TTAGAAGGTC | CGACTTAGAA | CCTTATTTGG |
| <i>P.tabacum</i>      | TGGAGAGGTA | GTGTCAGAAA | TTAGAAGGTC | CGACTTAGAA | CCTTATTTGG |
| <i>P.villosissima</i> | TGGAGAGGTA | GTGTCAGAAA | TTAGAAGGTC | CGACTTAGAA | CCTTATTTGG |

|                       | 860        | 870        | 880        | 890        | 900        |
|-----------------------|------------|------------|------------|------------|------------|
| <i>P.eburnea</i>      | GGCTGCACTA | TCCATCTACT | GATATCCCTC | AAGCAGCCCG | TTTCTTGTTC |
| <i>P.fimbrisejala</i> | GGCTGCACTA | TCCATCTACT | GATATCCCTC | AAGCAGCCCG | TTTCTTGTTC |
| <i>P.heterotricha</i> | GACTGCACTA | TCCATCTACT | GATATCCCTC | AAACAGCCCG | TTTCTTGTTC |
| <i>P.huaijiensis</i>  | GGCTGCACTA | TCCATCTACT | GATATCCCTC | AAGCAGCCCG | TTTCTTGTTC |
| <i>P.lutea</i>        | GGCTGCACTA | TCCATCTACT | GATATCCCTC | AAGCAGCCCG | TTTCTTGTTC |
| <i>P.pteropoda</i>    | GACTGCACTA | TCCATCTACT | GATATCCCTC | AAACAGCCCG | TTTCTTGTTC |
| <i>P.sinensis</i>     | GGCTGCACTA | TCCATCTACT | GATATCCCTC | AAGCAGCCCG | TTTCTTGTTC |
| <i>P.swinglei</i>     | GGCTGCACTA | TCCATCTACT | GATATCCCTC | AAGCAGCCCG | TTTCTTGTTC |
| <i>P.tabacum</i>      | GGCTGCACTA | TCCATCTACT | GATATCCCTC | AAGCAGCCCG | TTTCTTGTTC |
| <i>P.villosissima</i> | GGCTGCACTA | TCCATCTACT | GATATCCCTC | AAGCAGCCCG | TTTCTTGTTC |



|                       | 1210       | 1220       | 1230       | 1240       | 1250        |
|-----------------------|------------|------------|------------|------------|-------------|
| <i>P.eburnea</i>      | CAGCTTAATA | TGGAGCTTCA | ATTAGCATCA | CAGTTGGTGG | AAAAGAAAAAC |
| <i>P.fimbrisejala</i> | CAGCTTAATA | TGGAGCTTCA | ATTAGCATCA | CAGTTGGTGG | AAAAGAAAAAC |
| <i>P.heterotricha</i> | CAGCTTAATA | TGGAGCTTCA | ATTAGCATCA | CAGTTGGTGG | AAAAGAAAAAC |
| <i>P.huaijiensis</i>  | CAGCTTAATA | TGGAGCTTCA | ATTAGCATCA | CAGTTGGTGG | AAAAGAAAAAC |
| <i>P.lutea</i>        | CAGCTTAATA | TGGAGCTTCA | ATTAGCATCA | CAGTTGGTGG | AAAAGAAAAAC |
| <i>P.pteropoda</i>    | CAGCTTAATA | TGGAGCTTCA | ATTAGCATCA | CAGTTGGTGG | AAAAGAAAAAC |
| <i>P.sinensis</i>     | CAGCTTAACA | TGGAGCTTCA | ATTAGCATCA | CAGTTGGTGG | AAAAGAAAAAC |
| <i>P.swinglei</i>     | CAGCTTAATA | TGGAGCTTCA | ATTAGCATCA | CAGTTGGTGG | AAAAGAAAAAC |
| <i>P.tabacum</i>      | CAGCTTAATA | TGGAGCTTCA | ATTAGCATCA | CAGTTGGTGG | AAAAGAAAAAC |
| <i>P.villosissima</i> | CAGCTTAATA | TGGAGCTTCA | ATTAGCATCA | CAGTTGGTGG | AAAAGAAAAAC |

|                       | 1260        | 1270        | 1280       | 1290       | 1300       |
|-----------------------|-------------|-------------|------------|------------|------------|
| <i>P.eburnea</i>      | CCTTTCGGATG | CAAAACCTTAT | TGTGCGAGAT | GCTTCTTCGC | GGAGCTCCGT |
| <i>P.fimbrisejala</i> | CCTTTCGGATG | CAAAACCTTAT | TGTGCGAGAT | GCTTCTTCGC | GGAGCTCCGT |
| <i>P.heterotricha</i> | CCTTTCGGATG | CAAAACCTTAT | TGTGCGAGAT | GCTTCTTCGC | GGAGCTCCGT |
| <i>P.huaijiensis</i>  | CCTTTCGGATG | CAAAACCTTAT | TGTGCGAGAT | GCTTCTTCGC | GGAGCTCCGT |
| <i>P.lutea</i>        | CCTTTCGGATG | CAAAACCTTAT | TGTGCGAGAT | GCTTCTTCGC | GGAGCTCCGT |
| <i>P.pteropoda</i>    | CCTTTCGGATG | CAAAACCTTAT | TGTGCGAGAT | GCTTCTTCGC | GGAGCTCCGT |
| <i>P.sinensis</i>     | CCTTTCGGATG | CAAAACCTTAT | TGTGCGAGAT | GCTTCTTCGC | GGAGCTCCGT |
| <i>P.swinglei</i>     | CCTTTCGGATG | CAAAACCTTAT | TGTGCGAGAT | GCTTCTTCGC | GGAGCTCCGT |
| <i>P.tabacum</i>      | CCTTTCGGATG | CAAAACCTTAT | TGTGCGAGAT | GCTTCTTCGC | GGAGCTCCGT |
| <i>P.villosissima</i> | CCTTTCGGATG | CAAAACCTTAT | TGTGCGAGAT | GCTTCTTCGC | GGAGCTCCGT |

|                       | 1310       | 1320        | 1330       | 1340       | 1350        |
|-----------------------|------------|-------------|------------|------------|-------------|
| <i>P.eburnea</i>      | TTGGGATTGT | GAAATCAGTCT | CCCAATATCA | TGGATCTTGT | AAATTTGTGAC |
| <i>P.fimbrisejala</i> | TTGGGATTGT | GAAATCAGTCT | CCCAATATCA | TGGATCTTGT | AAATTTGTGAC |
| <i>P.heterotricha</i> | TTGGGATTGT | GAAATCAGTCT | CCCAATATCA | TGGATCTTGT | AAATTTGTGAC |
| <i>P.huaijiensis</i>  | TTGGGATTGT | GAAATCAGTCT | CCCAATATCA | TGGATCTTGT | AAATTTGTGAC |
| <i>P.lutea</i>        | TTGGGATTGT | GAAATCAGTCT | CCCAATATTA | TGGATCTTGT | AAATTTGTGAC |
| <i>P.pteropoda</i>    | TTGGGATTGT | GAAATCAGTCT | CCCAATATCA | TGGATCTTGT | AAATTTGTGAC |
| <i>P.sinensis</i>     | TTGGGATTGT | GAAATCAGTCT | CCCAATATTA | TGGATCTTGT | AAATTTGTGAC |
| <i>P.swinglei</i>     | TTGGGATTGT | GAAATCAGTCT | CCCAATATCA | TGGATCTTGT | AAATTTGTGAC |
| <i>P.tabacum</i>      | TTGGGATTGT | GAAATCAGTCT | CCCAATATCA | TGGATCTTGT | AAATTTGTGAC |
| <i>P.villosissima</i> | TTGGGATTGT | GAAATCAGTCT | CCCAATATCA | TGGATCTTGT | AAATTTGTGAC |

|                       | 1360       | 1370        | 1380       | 1390       | 1400       |
|-----------------------|------------|-------------|------------|------------|------------|
| <i>P.eburnea</i>      | GGGGCTGCAC | TATATTTACTG | TGGGAAATGT | TGGTTTCTTG | GTGTCACACC |
| <i>P.fimbrisejala</i> | GGGGCTGCAT | TATATTTACTG | TGGGAAATGT | TGGTTTCTTG | GTGTCACACC |
| <i>P.heterotricha</i> | GGGGCAGCAT | TATATTTACTG | TGGGAAATGT | TGGTTTCTTG | GTGTCACACC |
| <i>P.huaijiensis</i>  | GGGGCTGCAT | TATATTTACTG | TGGGAAATGT | TGGTTTCTTG | GTGTCACACC |
| <i>P.lutea</i>        | GGGGCTGCAT | TATATTTACTG | TGGGAAATGT | TGGTTTCTTG | GTGTCACACC |
| <i>P.pteropoda</i>    | GGGGCAGCAT | TATATTTACTG | TGGGAAATGT | TGGTTTCTTG | GTGTCACACC |
| <i>P.sinensis</i>     | GGGGCTGCAT | TATATTTACTG | TGGTAAATGT | TGGTTTCTTG | GTGTCACACC |
| <i>P.swinglei</i>     | GGGGCTGCAT | TATATTTACTG | TGGGAAATGT | TGGTTTCTTG | GTGTCACACC |
| <i>P.tabacum</i>      | GGGGCTGCAT | TATATTTACTG | TGGGAAATGT | TGGTTTCTTG | GTGTCACACC |
| <i>P.villosissima</i> | GGGGCTGCAT | TATATTTACTG | TGGGAAATGT | TGGTTTCTTG | GTGTCACACC |

|                       | 1410       | 1420        | 1430        | 1440       | 1450       |
|-----------------------|------------|-------------|-------------|------------|------------|
| <i>P.eburnea</i>      | GACTGAGGCA | CAAAATGAGAG | ATAATTGCTGA | ATGGCTACTA | AACAGCCTTG |
| <i>P.fimbrisejala</i> | GACTGAGGCA | CAAGTGAGAG  | ATAATTGCTGA | ATGGCTACTA | AACAGCCTTG |
| <i>P.heterotricha</i> | GACTGAGGCA | CAAAATGAGAG | ATAATTGCTGA | ATGGCTACTA | AACAGCCTTG |
| <i>P.huaijiensis</i>  | GACTGAGGCA | CAAAATGAGAG | ATAATTGCTGA | ATGGCTACTA | AACAGCCTTG |
| <i>P.lutea</i>        | GACTGAGGCA | CAAAATGAGAG | ATAATTGCTGA | ATGGCTACTA | AACAGCCTTG |
| <i>P.pteropoda</i>    | GACTGAGGCA | CAAAATGAGAG | ATAATTGCTGA | ATGGCTACTA | AACAGCCTTG |
| <i>P.sinensis</i>     | GACTGAGGCA | CAAAATGAGAG | ATAATTGCTGA | ATGGCTACTA | AACAGCCTTG |
| <i>P.swinglei</i>     | GACTGAGGCA | CAACTGAGAG  | ATAATTGCTGA | ATGGCTACTA | AACAGCCTTG |
| <i>P.tabacum</i>      | GACCGAGGCA | CAAAATGAGAG | ATAATTGCTGA | ATGGCTACTA | AACAGCCTTG |
| <i>P.villosissima</i> | GACTGAGGCA | CAAAATGAGAG | ATAATTGCTGA | ATGGCTACTA | AACAGCCTTG |

|                       | 1460       | 1470       | 1480        | 1490       | 1500       |
|-----------------------|------------|------------|-------------|------------|------------|
| <i>P.eburnea</i>      | AAGATTCCAC | AGGGTTAAGT | ACAGATAGTTC | TTGCTGATGC | TGGCTATCCA |
| <i>P.fimbrisejala</i> | AAGATTCCAC | AGGGTTAAGT | ACAGATAGTTC | TTGCTGATGC | TGGCTATCCA |
| <i>P.heterotricha</i> | AAGATTCCAC | AGGGTTAAGT | ACAGATAGTTC | TTGCTGATGC | TGGCTATCCA |
| <i>P.huaijiensis</i>  | AAGATTCCAC | AGGGTTAAGT | ACAGATAGTTC | TTGCTGGTGC | TGGCTATCCA |
| <i>P.lutea</i>        | AAGATTCCAC | AGGGTTAAGT | ACAGATAGTTC | TTGCTGATGC | TGGCTATCCA |
| <i>P.pteropoda</i>    | AAGATTCCAC | AGGGTTAAGT | ACAGATAGTTC | TTGCTGATGC | TGGCTATCCA |
| <i>P.sinensis</i>     | AAGATTCCAC | AGGGTTAAGT | ACAGATAGTTC | TTGCTGATGC | TGGCTATCCA |
| <i>P.swinglei</i>     | AAGATTCCAC | AGGGTTAAGT | ACAGATAGTTC | TTGCTGATGC | TGGCTATCCA |
| <i>P.tabacum</i>      | AAGATTCCAC | AGGGTTAAGT | ACAGATAGTTC | TTGCTGACGC | TGGCTATCCA |
| <i>P.villosissima</i> | AAGATTCCAC | AGGGTTAAGT | ACAGATAGTTC | TTGCTGATGC | TGGCTATCCA |

|                       | 1510        | 1520       | 1530       | 1540       | 1550       |
|-----------------------|-------------|------------|------------|------------|------------|
| <i>P.eburnea</i>      | GGTGCACCCAC | TGCTTGGTGA | CGCAGTTTGT | GGTATGATTG | CTGCAAAAAT |
| <i>P.fimbrisepala</i> | GGTGCAGCAC  | TGCTTGGTGA | CGCAGTTTGT | GGCATGATTG | CTGCAAAAAT |
| <i>P.heterotricha</i> | GGTGCAGCAC  | TGCTTGGTGA | CGCAGTTTGT | GGCATGATTG | CTGCAGAAT  |
| <i>P.huaijiensis</i>  | GGTGCAGCAC  | TGCTTGGTGA | CGCAGTTTGT | GGCATGATTG | CTGCAAAAAT |
| <i>P.lutea</i>        | GGTGCAGCAC  | TGCTTGGTGA | CGCAGTTTGT | GGCATGATTG | CTGCAAAAAT |
| <i>P.pteropoda</i>    | GGTGCAGCAC  | TGCTTGGTGA | CGCAGTTTGT | GGCATGATTG | CTGCAGAAT  |
| <i>P.sinensis</i>     | GGTGCAGCAC  | TGCTTGGTGA | CGCAGTTTGT | GGCATGATTG | CTGCAAAAAT |
| <i>P.swinglei</i>     | GGTGCAGCAC  | TGCTTGGTGA | CGCAGTTTGT | GGCATGATTG | CGGCAAGAAT |
| <i>P.tabacum</i>      | GGTGCAGCAC  | TGCTTGGTGA | CACAGTTTGT | GGCATGATTG | CTGCAGAAT  |
| <i>P.villosissima</i> | GGTGCAGCAC  | TGCTTGGTGA | CGCAGTTTGT | GGCATGATTG | CTGCAAAAAT |

|                       | 1560       | 1570       | 1580       | 1590        | 1600        |
|-----------------------|------------|------------|------------|-------------|-------------|
| <i>P.eburnea</i>      | TACATCCACC | GATTTTCTAT | TTTGGTTTAG | GTCCTCACACG | GCAAAGGAAA  |
| <i>P.fimbrisepala</i> | TACATCCACC | GATTTTCTAT | TTTGGTTTAG | ATCTCACACG  | GCAAAGGAAA  |
| <i>P.heterotricha</i> | TACATCCACC | GATTTTCTAT | TTTGGTTTAG | GTCCTCACACG | GCAAAGGAAAG |
| <i>P.huaijiensis</i>  | TACATCCACC | GATTTTCTAT | TTTGGTTTAG | GTCCTCACACG | GCAAAGGAAA  |
| <i>P.lutea</i>        | TACATCCACC | GATTTTCTAT | TTTGGTTTAG | GTCCTCACACG | GCAAAGGAAA  |
| <i>P.pteropoda</i>    | TACATCCACC | GATTTTCTAT | TTTGGTTTAG | GTCCTCACACG | GCAAAGGAAAG |
| <i>P.sinensis</i>     | TACATCCACC | GATTTTCTAT | TTTGGTTTAG | GTCCTCACACG | GCAAAGGAAAG |
| <i>P.swinglei</i>     | TACATCCACC | GATTTTCTAT | TTTGGTTTAG | GTCCTCACACG | GCAAAGGAAAG |
| <i>P.tabacum</i>      | TACATCCACC | GATTTTCTAT | TTTGGTTTAG | GTCCTCACACG | GCAAAGGAAA  |
| <i>P.villosissima</i> | TACATCCACC | GATTTTCTAT | TTTGGTTTAG | GTCCTCACACG | GCAAAGGAAA  |

|                       | 1610       | 1620       | 1630       | 1640       | 1650       |
|-----------------------|------------|------------|------------|------------|------------|
| <i>P.eburnea</i>      | TCAAATGGGG | AGGAGCTAAG | CATCATCCGG | AGGACAAAGA | TGACGGTGGG |
| <i>P.fimbrisepala</i> | TCAAATGGGG | AGGAGCTAAG | CATCATCCGG | AGGACAAAGA | TGACGGTGGG |
| <i>P.heterotricha</i> | TCAAATGGGG | AGGAGCTAAG | CATCACCCGG | AGGACAAAGA | TGATGGTGGG |
| <i>P.huaijiensis</i>  | TCAAATGGGG | AGGAGCTAAG | CATCATCCGG | AGGACAAAGA | TGACGGCGGG |
| <i>P.lutea</i>        | TCAAATGGGG | AGGAGCTAAG | CATCATCCAG | AGGACAAAGA | TGACGGTGGG |
| <i>P.pteropoda</i>    | TCAAATGGGG | AGGAGCTAAG | CATCACCCGG | AGGACAAAGA | TGATGGTGGG |
| <i>P.sinensis</i>     | TCAAATGGGG | AGGAGCTAAG | CATCATCCGG | AGGACAAAGA | TGACGGTGGG |
| <i>P.swinglei</i>     | TCAAATGGGG | AGGAGCTAAG | CATCATCCGG | AGGACAAAGA | TGACGGTGGG |
| <i>P.tabacum</i>      | TCAAATGGGG | AGGAGCTAAG | CATCATCCGG | AGGACAAAGA | TGACGGTGGG |
| <i>P.villosissima</i> | TCAAATGGGG | AGGAGCTAAG | CATCATCCGG | AGGACAAAGA | TGACGGTGGG |

|                       | 1660        | 1670       | 1680       | 1690        | 1700       |
|-----------------------|-------------|------------|------------|-------------|------------|
| <i>P.eburnea</i>      | AAAAATGCACC | CCAGATCTTC | ATTCAATACC | TTTCTTGAAAG | TAGTAAAAAG |
| <i>P.fimbrisepala</i> | AAAAATGCACC | CTAGATCTTC | ATTCAATACC | TTTCTTGAAAG | TAGTAAAAAG |
| <i>P.heterotricha</i> | AAAAATGCACC | CTAGATCTTC | ATTCAATACC | TTTCTTGAAAG | TAGTAAAAAG |
| <i>P.huaijiensis</i>  | AAAAATGCACC | CTAGATCTTC | ATTCAATACC | TTTCTTGAAAG | TAGTAAAAAG |
| <i>P.lutea</i>        | AAAAATGCACC | CTAGATCTTC | ATTCAATACC | TTTCTTGAAAG | TAGTAAAAAG |
| <i>P.pteropoda</i>    | AAAAATGCACC | CTAGATCTTC | ATTCAATACC | TTTCTTGAAAG | TAGTAAAAAG |
| <i>P.sinensis</i>     | AAAAATGCACC | CTAGATCTTC | ATTCAATACC | TTTCTTGAAAG | TAGTAAAAAG |
| <i>P.swinglei</i>     | AAAAATGCACC | CTAGATCTTC | ATTCAATACC | TTTCTTGAAAG | TAGTAAAAAG |
| <i>P.tabacum</i>      | AAAAATGCACC | CTAGATCTTC | ATTCAATACC | TTTCTTGAAAG | TAGTAAAAAG |
| <i>P.villosissima</i> | AAAAATGCACC | CTAGATCTTC | ATTCAACACC | TTTCTTGAAAG | TAGTAAAAAG |

|                       | 1710       | 1720       | 1730       | 1740        | 1750       |
|-----------------------|------------|------------|------------|-------------|------------|
| <i>P.eburnea</i>      | CCGGAGTTTG | CAGTGGGAGG | TTGCAGAGAT | TAAATGCAATT | CATTCTCTCC |
| <i>P.fimbrisepala</i> | CCGGAGTTTG | CAGTGGGAGG | TTGCAGAGAT | TAAATGCAATT | CATTCTCTCC |
| <i>P.heterotricha</i> | CCGGAGTTTG | CAGTGGGAGG | TTGCAGAGAT | TAAATGCAATT | CATTCTCTCC |
| <i>P.huaijiensis</i>  | CCGGAGTTTG | CAGTGGGAGG | TTGCAGAGAT | TAAATGCAATT | CATTCTCTCC |
| <i>P.lutea</i>        | CCGGAGTTTG | CAGTGGGAGG | TTGCAGAGAT | TAAATGCAATT | CATTCTCTCC |
| <i>P.pteropoda</i>    | CCGGAGTTTG | CAGTGGGAGG | TTGCAGAGAT | TAAATGCAATT | CATTCTCTCC |
| <i>P.sinensis</i>     | CCGGAGTTTG | CAGTGGGAGG | TTGCAGAGAT | TAAATGCAATT | CATTCTCTCC |
| <i>P.swinglei</i>     | CCGGAGTTTG | CAGTGGGAGG | TTGCAGAGAT | TAAATGCAATT | CATTCTCTCC |
| <i>P.tabacum</i>      | CCGGAGTTTG | CATTGGGAGG | TTGCAGAGAT | TAAATGCAATT | CATTCTCTCC |
| <i>P.villosissima</i> | CCGGAGTTTG | CAGTGGGAGG | TTGCAGAGAT | TAAATGCAATT | CATTCTCTCC |

|                       | 1760       | 1770       | 1780        | 1790       | 1800        |
|-----------------------|------------|------------|-------------|------------|-------------|
| <i>P.eburnea</i>      | AACTTATATT | GAGAAATTCA | TTCC TGGAGA | TTGAAGAAGG | CAGTCC TAAA |
| <i>P.fimbrisepala</i> | AACTTATATT | GAGAAATTCA | TTCC TGGAGA | TTGAAGAAGG | CGGCCCTAAA  |
| <i>P.heterotricha</i> | AACTTATATT | GAGAAATTCA | TTCC TGGAGA | TTGAAGAAGG | CGGTCC TAAA |
| <i>P.huaijiensis</i>  | AACTTATATT | GAGAAATTCA | TTCC TGGAGA | TTGAAGAAGG | CGGTCC TAAA |
| <i>P.lutea</i>        | AACTTATATT | GAGAAATTCG | TTCC TGGAGA | TGAAGAAGG  | CGGTCC TAAA |
| <i>P.pteropoda</i>    | AACTTATATT | GAGAAATTCA | TTCC TGGAGA | TTGAAGAAGG | CGGTCC TAAA |
| <i>P.sinensis</i>     | AACTTATATT | GAGAAATTCA | TTCC TGGAGA | TTGAAGAAGG | CGGTCC TAAA |
| <i>P.swinglei</i>     | AACTTATATT | GAGAAATTCG | TTCC TGGAGA | TTGAAGAAA  | CGGTCC TAAA |
| <i>P.tabacum</i>      | AACTTATATT | GAGAAATTCG | TTCC TGGAGA | TTGAAGAAGG | CGGTCC TAAA |
| <i>P.villosissima</i> | AACTTATATT | GAGAAATTCG | TTCC TGGAGA | TTGAAGAAGG | CGGTCC TAAA |

|                       | 1810       | 1820       | 1830       | 1840        | 1850        |
|-----------------------|------------|------------|------------|-------------|-------------|
| <i>P.eburnea</i>      | CCTGATATAT | TTTCTCAACA | AAATGATTCT | GAGAACCCAC  | AGCTGAAATGA |
| <i>P.fimbrisepala</i> | CCTGATATAT | TTTCTCAACA | AAATGATTCT | GACAAACCCAC | AGCTGAAATGA |
| <i>P.heterotricha</i> | CCTGATATAT | TTTCTCAACA | AAATGATTCT | GAGAAATCCAC | AGCTGGATGA  |
| <i>P.huaijiensis</i>  | CCTGATATAT | TTTCTCAACA | AAATGATTCT | GACAAACCCAC | AGCTGAAATGA |
| <i>P.lutea</i>        | CCTGATATAT | TTTCTCAACA | AAATGATTCT | GACAAACCCAC | AGCTGAAATGA |
| <i>P.pteropoda</i>    | CCTGATATAT | TTTCTCAACA | AAATGATTCT | GAGAAATCCAC | AGCTGGATGA  |
| <i>P.sinensis</i>     | CCTGATATAT | TTTCTCAACA | AAATGATTCT | GACAAACCCAC | AGCTGGATGA  |
| <i>P.swinglei</i>     | CCTGATATAT | TTTCTCAACA | AAATGATTCT | GACAAACCCAC | AGCTGGATGA  |
| <i>P.tabacum</i>      | CCTGATATAT | TTTCTCAACA | AAATGATTCT | GACAAACCCAC | AGCTGAAATGA |
| <i>P.villosissima</i> | CCTGATATAT | TTTCTCAACA | AAATGATTCT | GACAAACCCAC | AGCTGAAATGA |

|                       | 1860        | 1870       | 1880       | 1890       | 1900       |
|-----------------------|-------------|------------|------------|------------|------------|
| <i>P.eburnea</i>      | ACTTACTTTCG | GCCGCTGCTG | AAATGGTCCG | GCTGATAGAA | ACAGCTACTG |
| <i>P.fimbrisepala</i> | ACTTACTTTC  | GCTGCTGCTG | AAATGGTCCG | GCTGATAGAA | ACAGCTACTG |
| <i>P.heterotricha</i> | ACTTACTTTC  | GCCGCTGCTG | AAATGGTCCG | GTTGATAGAA | ACAGCTACTG |
| <i>P.huaijiensis</i>  | ACTTACTTTC  | GCTGCTGCTG | AAATGGTCCG | GCTGATAGAA | ACAGCTACTG |
| <i>P.lutea</i>        | ACTTACTTTCG | GCCGCTGCTG | AAATGGTCCG | GCTGATAGAA | ACAGCTACTG |
| <i>P.pteropoda</i>    | ACTTACTTTC  | GCCGCCGCTG | AAATGGTCCG | GTTGATAGAA | ACAGCTACTG |
| <i>P.sinensis</i>     | ACTTACTTTC  | GCCGCTGCTG | AAATGGTCCG | GCTGATAGAA | ACAGCTACTG |
| <i>P.swinglei</i>     | ACTTACTTTC  | GCCGCTGCTG | AAATGGTCCG | GCTGATAGAA | ACAGCTACTG |
| <i>P.tabacum</i>      | ACTTACTTTC  | GCCGCTGCTG | AAATGGTCCG | GCTGATAGAA | ACAGCTACTG |
| <i>P.villosissima</i> | ACTTACTTTC  | GCTGCTGCTG | AAATGGTCCG | GCTGATAGAA | ACAGCTACTG |

|                       | 1910        | 1920        | 1930        | 1940       | 1950        |
|-----------------------|-------------|-------------|-------------|------------|-------------|
| <i>P.eburnea</i>      | TTCCAATTTTT | TGGAGTTCGAT | GCAATCCGGTT | GGATCAATGG | GTGGAAATGCT |
| <i>P.fimbrisepala</i> | TTCCAATTTTT | TGGAGTTCGAT | TCAATCCGGTT | GGATCAATGG | GTGGAAATGCT |
| <i>P.heterotricha</i> | TTCCAATTTTT | TGGAGTAGAT  | TCAATCCGGTT | GGATCAATGG | GTGGAAATGCT |
| <i>P.huaijiensis</i>  | TTCCAATTTTT | TGGAGTTCGAT | TCAATCCGGTT | GGATCAATGG | GTGGAAATGCT |
| <i>P.lutea</i>        | TTCCAATTTTT | TGGAGTTCGAT | GCAATCCGGTT | GGATCAATGG | GTGGAAATGCT |
| <i>P.pteropoda</i>    | TTCCAATTTTT | TGGAGTAGAT  | TCAATCCGGTT | GGATCAATGG | GTGGAAATGCT |
| <i>P.sinensis</i>     | TTCCAATTTTT | TGGAGTTCGAT | TCAATCCGGTT | GGATCAATGG | GTGGAAATGCT |
| <i>P.swinglei</i>     | TTCCAATTTTT | TGGAGTAGAT  | TCAATCCGGTT | GGATCAATGG | GTGGAAATGCT |
| <i>P.tabacum</i>      | TTCCAATTTTT | TGGAGTTGAT  | TCAATCCGGTT | GGATCAATGG | GTGGAAATGCT |
| <i>P.villosissima</i> | TTCCAATTTTT | TGGAGTTCGAT | TCAATCCGGTT | GGATCAATGG | GTGGAAATGCT |

|                       | 1960        | 1970       | 1980       | 1990       | 2000       |
|-----------------------|-------------|------------|------------|------------|------------|
| <i>P.eburnea</i>      | AAGATGCAATG | AGTTGACGGG | GTTGACTCTG | TCCGAAGCTT | TGGGAAAGTC |
| <i>P.fimbrisepala</i> | AAGATGCAATG | AGTTGACGGG | GTTGACTCTG | TCCGAAGCTT | TGGGAAAGTC |
| <i>P.heterotricha</i> | AAGATGCAATG | AGTTGACAGG | GTTGACTCTG | TCCGAAGCTT | TGGGAAAGTC |
| <i>P.huaijiensis</i>  | AAGATGCAATG | AGTTGACGGG | GTTGACTCTG | TCCGAAGCTT | TGGGAAAGTC |
| <i>P.lutea</i>        | AAGATGCAATG | AGTTGACGGG | GTTGACTCTG | TCCGAAGCTT | TGGGAAAGTC |
| <i>P.pteropoda</i>    | AAGATGCAATG | AGTTGACAGG | GTTGACTCTG | TCCGAAGCTT | TGGGAAAGTC |
| <i>P.sinensis</i>     | AAGATGCAATG | AGTTGACGGG | GTTGACTCTG | TCCGAAGCTT | TGGGAAAGTC |
| <i>P.swinglei</i>     | AAGATGCAATG | AAATGACGGG | GTTGACTCTG | TCCGAAGCTT | TGGGAAAGTC |
| <i>P.tabacum</i>      | AAGATGCAATG | AGTTGACGGG | GTTGACTCTG | TCTGAAGCTT | TGGGAAAGTC |
| <i>P.villosissima</i> | AAGATGCAATG | AGTTGACGGG | GTTGACTCTG | TCCGAAGCTT | TGGGAAAGTC |

|                       | 2010       | 2020       | 2030       | 2040       | 2050       |
|-----------------------|------------|------------|------------|------------|------------|
| <i>P.eburnea</i>      | TCTGATCAAC | GATGTCATTC | ATGAAGACTC | GCGTGGAGCT | ACTGAAATCC |
| <i>P.fimbrisepala</i> | TCTGATCAAC | GATGTCATTC | ATGAAGACTC | GCGTGGAGCT | GCTGAAATCC |
| <i>P.heterotricha</i> | TCTGATCAAC | GATGTCATTC | ATGAAGACTC | GCGTGGAGCT | GCTGAAATCC |
| <i>P.huaijiensis</i>  | TCTGATCAAC | GATGTCATTC | ATGAAGACTC | GCGTGGAGCT | GCTGAAATCC |
| <i>P.lutea</i>        | TCTGATCAAC | GATGTCATTC | ATGAAGACTC | GCGTGGAGCT | ACTGAAATCC |
| <i>P.pteropoda</i>    | TCTGATCAAC | GATGTCATTC | ATGAAGACTC | GCGTGGAGCT | GCTGAAATCC |
| <i>P.sinensis</i>     | TCTGATCAAC | GATGTCATTC | ATGAAGACTC | GCGTGGAGCT | GCTGAAATCC |
| <i>P.swinglei</i>     | TCTGATCAAC | GATGTCATTC | ATGAAGACTC | GCGTGGAGCT | GCTGAAATCC |
| <i>P.tabacum</i>      | TCTGATCAAC | GATGTCATTC | ACGAAGACTC | GCGTGGAGCT | ACTGAAATCC |
| <i>P.villosissima</i> | TCTGATCAAC | GATGTCATTC | ACGAAGACTC | GCGTGGAGCT | GCTGAAATCC |

|                       | 2060       | 2070       | 2080       | 2090         | 2100       |
|-----------------------|------------|------------|------------|--------------|------------|
| <i>P.eburnea</i>      | TGCTGCAAAG | AGCTCTGCAC | GGTGAGGAGG | AAAAAAAAATGT | TGAAGTGAAG |
| <i>P.fimbrisepala</i> | TGCTGCAAAG | AGCTCTGCAC | GGTGAGGAGC | AAAAAAAAATGT | TGAAGTGAAG |
| <i>P.heterotricha</i> | TGCTGCAAAG | AGCTCTGCAC | GGTGAGGAGG | AAAAAAAAATGT | TGAAGTGAAG |
| <i>P.huaijiensis</i>  | TGTTGCAAAG | AGCTCTGCAC | GGTGAGGAGA | AAAAAAAAATGT | TGAAGTGAAG |
| <i>P.lutea</i>        | TGCTGCAAAG | AGCTCTGCAC | GGCGAGGAGG | AAAAAAAAATGT | TGAAGTGAAG |
| <i>P.pteropoda</i>    | TGCTGCAAAG | AGCTCTGCAC | GGTGAGGAGG | AAAAAAAAATGT | TGAAGTGAAG |
| <i>P.sinensis</i>     | TGCTGCAAAG | AGCTCTGCAC | GGCGAGGAGG | AAAAAAAAATGT | TGAAGTGAAG |
| <i>P.swinglei</i>     | TGCTGCAAAG | AGCTCTGCAC | GGTGAGGAGG | AAAAAAAAATGT | TGAAGTGAAG |
| <i>P.tabacum</i>      | TGCTGCAAAG | AGCTCTGCAC | GGTGAGGAGG | AAAAAAAAATGT | TGAAGTGAAG |
| <i>P.villosissima</i> | TGCTGCAAAG | AGCTCTGCAC | GGTGAGGAGG | AAAAAAAAATGT | TGAAGTGAAG |

|                       | 2110       | 2120       | 2130       | 2140       | 2150       |
|-----------------------|------------|------------|------------|------------|------------|
| <i>P.eburnea</i>      | CTAATGACTT | TTGGGGGACA | TGTTCCAAAC | GCTGTTATCC | TTGCTAATGC |
| <i>P.fimbrispala</i>  | CTACTGACTT | TTGGGGGACA | CGTTCCAAAC | GCTGTTATCC | TTGCTAATGC |
| <i>P.heterotricha</i> | CTACTGACTT | TTGGGGGACA | CGTTCCAAAC | GCTGTTATCC | TTGCTAATGC |
| <i>P.huaijiensis</i>  | CTACTGACTT | TTGGGGGACA | CGTTCCAAAT | GCTGTTATCC | TTGCTAATGC |
| <i>P.lutea</i>        | CTACTGACTT | TTGGGGGACA | AGTTCCAAAC | GCTGTTATCC | TTGCTAATGC |
| <i>P.pteropoda</i>    | CTACTGACTT | TTGGGGGACA | CGTTCCAAAC | GCTGTTATCC | TTGCTAATGC |
| <i>P.sinensis</i>     | CTACTGACTT | TTGGGGGACA | CGTTCCAAAC | GCTGTTATCC | TTGCTAATGC |
| <i>P.swinglei</i>     | CTACTGACTT | TTGGGGGACA | CGTTCCAAAC | GCTGTTATAC | TTGCTAATGC |
| <i>P.tabacum</i>      | CTACTGACTT | TTGGGGGACA | CGTTCCAAAC | GCTGTTATCC | TTGCTAATGC |
| <i>P.villosissima</i> | CTACTGACTT | TTGGGGGACA | CGTTCCAAAC | GCTGTTATCC | TTGCTAATGC |

|                       | 2160       | 2170       | 2180        | 2190       | 2200        |
|-----------------------|------------|------------|-------------|------------|-------------|
| <i>P.eburnea</i>      | TTGTACAAGT | AGGAACATAA | AAAAATGATGT | TGTTGGAGTT | TGCTTTATTTG |
| <i>P.fimbrispala</i>  | TTGTACCAGT | AGGAACATAA | AAAAATGATGT | TGTTGGAGTT | TGCTTTATTTG |
| <i>P.heterotricha</i> | TTGTACCAGT | AGGAACATAA | AAAAATGATGT | TGTTGGAGTT | TGCTTTATTTG |
| <i>P.huaijiensis</i>  | TTGTACCAGT | AGGAACATAA | AAAAATGATGT | TGTTGGAGTT | TGCTTTATTTG |
| <i>P.lutea</i>        | TTGTACCAGT | AGGAACATAA | AAAAATGATGT | TGTAGGAGTT | TGCTTTATTTG |
| <i>P.pteropoda</i>    | TTGTACCAGT | AGGAACATAA | AAAAATGATGT | TGTTGGAGTT | TGCTTTATTTG |
| <i>P.sinensis</i>     | TTGTATCAGT | AGGAACATAA | AAAAATGATGT | TGTTGGAGTT | TGCTTTATTTG |
| <i>P.swinglei</i>     | TTGTACCAGT | AGGAACATAA | AAAAATGATGT | TGTTGGAGTT | TGCTTTATTTG |
| <i>P.tabacum</i>      | TTGTACCAGT | AGGAACATAA | AAAAATGATGT | TGTTGGAGTT | TGCTTTATTTG |
| <i>P.villosissima</i> | TTGTACCAGT | AGGAACATAA | AAAAATGATGT | TGTTGGAGTT | TGCTTTATTTG |

|                       | 2210        | 2220       | 2230        | 2240       | 2250       |
|-----------------------|-------------|------------|-------------|------------|------------|
| <i>P.eburnea</i>      | GTC AAGATGT | CACAGCTGAG | AAAAATAGTGA | TGGACAAGTT | CATCCGCTTG |
| <i>P.fimbrispala</i>  | GTC AAGATGT | CACAGCTGAG | AAAAATAGTGA | TGGACAAGTT | CATCCGCTTG |
| <i>P.heterotricha</i> | GTC AAGATGT | CACAGCTGAG | AAAAATAGTGA | TGGACAAGTT | CATCCGCTTG |
| <i>P.huaijiensis</i>  | GTC AAGATGT | CACAGCTGAG | AAACTAGTGA  | TGGACAAGTT | CATCCGCTTG |
| <i>P.lutea</i>        | GTC AAGATGT | CACAGCTGAG | AAAAATAGTGA | TGGACAAGTT | CATCCGCTTG |
| <i>P.pteropoda</i>    | GTC AAGATGT | CACAGCTGAG | AAAAATAGTGA | TGGACAAGTT | CATCCGCTTG |
| <i>P.sinensis</i>     | GTC AAGATGT | CACAGCTGAG | AAAAATAGTGA | TGGACAAGTT | CATCCGCTTG |
| <i>P.swinglei</i>     | GTC AAGATGT | CACAGCTGAG | AAAAATAGTGA | TGGACAAGTT | CATCCGCTTG |
| <i>P.tabacum</i>      | GTC AAGATGT | CACAGCTGAG | AAAAATAGTGA | TGGACAAGTT | CATCCGCTTG |
| <i>P.villosissima</i> | GTC AAGATGT | CACAGCTGAG | AAAAATAGTGA | TGGACAAGTT | CATCCGCTTG |

|                       | 2260       | 2270        | 2280        | 2290       | 2300       |
|-----------------------|------------|-------------|-------------|------------|------------|
| <i>P.eburnea</i>      | CAAGGGGACT | ACAAGATTTAT | TATGCAAAGC  | CTAAGTCCAC | TGATTCGGCC |
| <i>P.fimbrispala</i>  | CAAGGGGACT | ACAAGATTTAT | TATGCAAAGC  | CTAAGTCCAC | TGATTCGGCC |
| <i>P.heterotricha</i> | CAAGGGGACT | ACAAGATTTAT | TATGCAAAGC  | CTAAGTCCCT | TGATTCCTCC |
| <i>P.huaijiensis</i>  | CAAGGGGACT | ACAAGATTTAT | TATGCAAAGC  | CTAAGTCCAC | TGATTCGGCC |
| <i>P.lutea</i>        | CAAGGGGACT | ACAAGATTTAT | TATGCAAAGC  | CTAAGTCCAC | TGATTCGGCC |
| <i>P.pteropoda</i>    | CAAGGGGACT | ACAAGATTTAT | TATGCAAAGC  | CTAAGTCCAC | TGATTCCTCC |
| <i>P.sinensis</i>     | CAAGGGGACT | ACAAGATTTAT | TATGCAAAGC  | CTAAGTCCAC | TGATTCGGCC |
| <i>P.swinglei</i>     | CAAGGGGACT | ACAAGATTTAT | TATGCAAAGC  | CTAAGTCCAC | TGATTCGGCC |
| <i>P.tabacum</i>      | CAAGGGGACT | ACAAGATTTAT | TATGCAAAGC  | CTAAGTCCAC | TGATTCGGCC |
| <i>P.villosissima</i> | CAAGGGGACT | ACAAGATTTAT | AAATGCAAAGC | CTAAGTCCAC | TGATTCGGCC |

|                       | 2310       | 2320       | 2330       | 2340       | 2350        |
|-----------------------|------------|------------|------------|------------|-------------|
| <i>P.eburnea</i>      | TATTTTTGCT | TCAGACGAGA | ATGCCTGTTG | TTCTGAATGG | AAATGCAGCCA |
| <i>P.fimbrispala</i>  | TATTTTTGCT | TCAGACGAGA | ATGCCTGTTG | TTCTGAATGG | AAATGCAGCCA |
| <i>P.heterotricha</i> | TATTTTTGCT | TCAGACGAGA | ATGCCTGTTG | TTCTGAATGG | AAATGCAGCCA |
| <i>P.huaijiensis</i>  | TATTTTTGCT | TCAGACGAGA | ATGCCTGTTG | TTCTGAATGG | AAATGCAGCCA |
| <i>P.lutea</i>        | TATTTTTGCT | TCAGACGAGA | ATGCCTGTTG | TTCTGAATGG | AAATGCAGCCA |
| <i>P.pteropoda</i>    | TATTTTTGCT | TCAGACGAGA | ATGCCTGTTG | TTCTGAATGG | AAATGCAGCCA |
| <i>P.sinensis</i>     | TATTTTTGCT | TCAGACGAGA | ATGCCTGTTG | TTCTGAATGG | AAATGCAGCCA |
| <i>P.swinglei</i>     | TATTTTTGCT | TCAGACGAGA | ATGCCTGTTG | TTCTGAATGG | AAATGCAGCCA |
| <i>P.tabacum</i>      | TATTTTTGCT | TCAGACGAGA | ATGCCTGTTG | TTCTGAATGG | AAATGCAGCCA |
| <i>P.villosissima</i> | TATTTTTGCT | TCAGACGAGA | ATGCCTGTTG | TTCTGAATGG | AAATGCAGCCA |

|                       | 2360       | 2370       | 2380        | 2390        | 2400       |
|-----------------------|------------|------------|-------------|-------------|------------|
| <i>P.eburnea</i>      | TGGAAAAGCT | GACTGGCTGG | ATGAAAACACG | AGATTATTGG  | AAAGATGTTA |
| <i>P.fimbrispala</i>  | TGGAAAAGCT | GACTGGCTGG | ATGAAAACACG | AGATTATTGG  | AAAGATGTTA |
| <i>P.heterotricha</i> | TGGAAAAGCT | GACTGGCTGG | ACGAAAACACG | AGATTAAATGG | AAAGATGTTA |
| <i>P.huaijiensis</i>  | TGGAAAAGCT | GACTGGCTGG | ATGAAAACACG | AGATTATTGG  | AAAGATGTTA |
| <i>P.lutea</i>        | TGGAAAAGCT | GACTGGCTGG | ATGAAAACATG | AGATTATTGG  | AAAGATGTTA |
| <i>P.pteropoda</i>    | TGGAAAAGCT | GACTGGCTGG | ACGAAAACACG | AGATTATTGG  | AAAGATGTTA |
| <i>P.sinensis</i>     | TGGAAAAGCT | GACTGGCTGG | ATGAAAACACG | AGATTATTGG  | AAAGATGTTA |
| <i>P.swinglei</i>     | TGGAAAAGCT | GACTGGCTGG | ATGAAAACACG | AGATTATTGG  | AAAGATGTTA |
| <i>P.tabacum</i>      | TGGAAAAGCT | GACTGGCTGG | ATGAAAACACG | AGATTATTGG  | AAAGATGTTA |
| <i>P.villosissima</i> | TGGAAAAGCT | GACTGGCTGG | ATGAAAACACG | AGATTATTCGG | AAAGATGTTA |



|                       | 2410       | 2420         | 2430        | 2440       | 2450       |
|-----------------------|------------|--------------|-------------|------------|------------|
| <i>P.eburnea</i>      | CCTGGTGAAA | TTTTTTGGAAG  | CTTCTGTTCGG | CTGAAAGGTC | AGGACGAGCT |
| <i>P.fimbrisepala</i> | CCTGGTGAAA | TTTTTTGGAAG  | CTTCTGTTCGG | CTGAAAGGTC | AAGACGAGCT |
| <i>P.heterotricha</i> | CCTGGTGAAA | TTTTTTGGAAG  | CTTCTGTTCGG | CTGAAAGGTC | AAGACGAGCT |
| <i>P.huaijiensis</i>  | CCTGGTGAAA | TATTTTGGAAAG | CTTCTGTTCGG | CTGAAAGGTC | AAGACGAGCT |
| <i>P.lutea</i>        | CCTGGTGAAA | TTTTTTGGAAG  | CTTCTGTTCGG | CTGAAAGGTC | AAGACGAGCT |
| <i>P.pteropoda</i>    | CCTGGTGAAA | TTTTTTGGAAG  | CTTCTGTTCGG | CTGAGAGGTC | AAGACGAGCT |
| <i>P.sinensis</i>     | CCTGGTGAAA | TTTTTTGGAAG  | CTTCTGTTCGG | CTGAAAGGTC | AAGACGAGCT |
| <i>P.swinglei</i>     | CCTGGTGAAA | TTTTTTGGAAG  | CTTCTGTAGG  | CTGAAAGGTC | AGGACGAGCT |
| <i>P.tabacum</i>      | CCTGGTGAAA | TTTTTTGGAAG  | CTTCTGTTCGG | CTGAAAGGTC | AGGATGAGCT |
| <i>P.villosissima</i> | CCTGGTGAAA | TTTTTTGGAAG  | CTTCTGTTCGG | CTGAAAGGTC | AAGACGAGCT |

|                       | 2460        | 2470        | 2480        | 2490       | 2500        |
|-----------------------|-------------|-------------|-------------|------------|-------------|
| <i>P.eburnea</i>      | GACTAAAATTC | ATGATTCTTTT | TTTACCAGAGC | AATTAGCGGC | CAGGACACTC  |
| <i>P.fimbrisepala</i> | GACTAAAATTC | ATGATTCTTTT | TGTACCAGAGC | AATTAGTGGC | CAGGACACTC  |
| <i>P.heterotricha</i> | GACTAAAATTC | ATGATTCTTTT | TGTACCAGAGC | AATTAGTGGC | CAGGACACTC  |
| <i>P.huaijiensis</i>  | GACTAAAATTC | ATGATTCTTTT | TTTACCAGAGC | AATTAGTGGC | CAGGACACTC  |
| <i>P.lutea</i>        | GACTAAAATTC | ATGATTCTTTT | TGTACCAGAGC | AATTAGTGGC | CAGGACACTC  |
| <i>P.pteropoda</i>    | GACTAAAATTC | ATGATTCTTTT | TGTACCAGAGC | AATTAGTGGC | CAGGACACTC  |
| <i>P.sinensis</i>     | GACTAAAATTC | ATGATTCTTTT | TGTACCAGAGC | AATTAGTGGC | CAGGACACTC  |
| <i>P.swinglei</i>     | GACTAAAATTC | ATGATTCTTTT | TGTACCAGAGC | AATTAGTGGC | CAGGACACTC  |
| <i>P.tabacum</i>      | GACTAAAATTC | ATGATTCTTTT | TGTACCAGAGC | AATTAGTGGC | CAGGACAAATC |
| <i>P.villosissima</i> | GACTAAAATTC | ATGATTCTTTT | TGTACCAGAGC | AATTAGTGGC | CAGGACACTC  |

|                       | 2510       | 2520        | 2530         | 2540        | 2550       |
|-----------------------|------------|-------------|--------------|-------------|------------|
| <i>P.eburnea</i>      | AAACGCTCCC | ATTTGGTTTTT | TTTGACC GGGA | GTTGGTGAGTT | TGTCGATGTG |
| <i>P.fimbrisepala</i> | AAACGCTCCC | ATTTGGTTTTT | TTTGACC GGGA | GAGGTTGAGTT | TGTCGATGTG |
| <i>P.heterotricha</i> | AAACGCTCCC | ATTTGGTTTTT | TTTGACC GGGA | GAGGTTGAGTT | TGTCGATGTG |
| <i>P.huaijiensis</i>  | AAACGCTACC | ATTTGGTTTTT | TTTGACC GGGA | GAGGTTGAGTT | TGTCGATGTG |
| <i>P.lutea</i>        | AAACGCTCCC | ATTTGGTTTTT | TTTGACC GGGA | GAGGTTGAGTT | TGTCGATGTG |
| <i>P.pteropoda</i>    | AAACGCTCCC | ATTTGGTTTTT | TTTGACC GGGA | GAGGTTGAGTT | TGTCGATGTG |
| <i>P.sinensis</i>     | AAACGCTCCC | ATTTGGTTTTT | TTTGACC GGGA | GAGGTTGAGTT | TGTCGACGTG |
| <i>P.swinglei</i>     | AAACACTCCC | ATTTGGTTTTT | TTTGACC GGGA | GAGGTTGAGTT | TGTCGATGTG |
| <i>P.tabacum</i>      | AAACGCTCCC | ATTTGGTTTTT | TTTGACC GGGA | GAGGTTGAGTT | TGTCGATGTG |
| <i>P.villosissima</i> | AAACGCTTCC | ATTTGGTTTTT | TTTGACC GGGA | GAGGTTGAGTT | TGTCGATGTG |

|                       | 2560       | 2570        | 2580       | 2590        | 2600        |
|-----------------------|------------|-------------|------------|-------------|-------------|
| <i>P.eburnea</i>      | CTTTTGACAG | CAAAATAAGAA | AACAGAGGAG | GGTGGGAAATG | TGAAACGGGTG |
| <i>P.fimbrisepala</i> | CTTTTGACAG | CAAAATAAGAA | AACAGAGGAG | GGTGGGAAATG | TGAAACGGGTG |
| <i>P.heterotricha</i> | CTTTTGACAG | CAAAATAAGAA | AACAGAGGAG | GGTGGGAAATG | TGAAACGGGTG |
| <i>P.huaijiensis</i>  | CTTTTGACAG | CAAAATAAGAA | AACAGAGGAG | GGTGGGAAATG | TGAAACGGGTG |
| <i>P.lutea</i>        | CTTTTGACAG | CAAAATAAGAA | AACAGAGGAG | GGTGGGAAATG | TGAAACGGGTG |
| <i>P.pteropoda</i>    | CTTTTGACAG | CAAAATAAGAA | AACAGAGGAG | GGTGGGAAATG | TGAAACGGGTG |
| <i>P.sinensis</i>     | CTTTTGACAG | CAAAATAAGAA | AACAGAGGAG | GGTGGGAAATG | TGAAACGGGTG |
| <i>P.swinglei</i>     | CTTTTGACAG | CAAAATAAGAA | AACAGAGGAG | GGTGGGAAATG | TGAAACGGGTG |
| <i>P.tabacum</i>      | CTTTTGACAG | CAAAATAAGAA | AACAGAGGAG | GGTGGGAAATG | TGAAACGGGTG |
| <i>P.villosissima</i> | CTTTTGACAG | CAAAATAAGAA | AACAGAGGAG | GGTGGGAAATG | TGAAACGGGTG |

|                       | 2610       | 2620       | 2630        | 2640       | 2650        |
|-----------------------|------------|------------|-------------|------------|-------------|
| <i>P.eburnea</i>      | TTTCTGCTTC | TTGCAGACTG | TACCGAAAACA | GCAACAGTTC | ATGTTAGATA  |
| <i>P.fimbrisepala</i> | TTTCTGCTTC | TTGCAGACTG | TACCGAAAACA | GCAACAGTTC | ATGTTAGATA  |
| <i>P.heterotricha</i> | TTTCTGCTTC | TTGCAGACTG | TACCGAAAACA | GCAACAGTTC | GTTGTTAAATG |
| <i>P.huaijiensis</i>  | TTTCTGCTTC | TTGCAGACTG | TCCCGAAAACA | GCAACAGTTC | ATGTTAGATA  |
| <i>P.lutea</i>        | TTTCTGCTTC | TTGCAGACTG | TACCGAAAACA | GCAACAGTTC | ATGTTAGATA  |
| <i>P.pteropoda</i>    | TTTCTGCTTC | TTGCAGACTG | TACCGAAAACA | GCAACAGTTC | GTTGTTAAATA |
| <i>P.sinensis</i>     | TTTCTGCTTC | TTGCAGACTG | TACCGAAAACA | GCAACAGTTC | ATGTTAGATA  |
| <i>P.swinglei</i>     | TTTCTGCTTC | TTGCAGACTG | TACCGAAAACA | GCAACAGTTC | ATGTTAGATA  |
| <i>P.tabacum</i>      | TTTCTGCTTC | TTGCAGACTG | TACCGAAAACA | GCAACAGTTC | ATGTTAGATA  |
| <i>P.villosissima</i> | CTTCTGCTTC | TTGCAGACTG | TACCGAAAACA | GCAACAGTTC | ATGTTAGATA  |

|                       | 2660       | 2670       | 2680        | 2690       | 2700       |
|-----------------------|------------|------------|-------------|------------|------------|
| <i>P.eburnea</i>      | AGTCGGAAGG | AAAGGAGCAG | CTTTCAA AAC | TTAAAGAGTT | GGCTTACGTT |
| <i>P.fimbrisepala</i> | AGTCGGAAGG | AAAGGAGCAG | CTTTCAA AAC | TTAAAGAGTT | GGCTTACATA |
| <i>P.heterotricha</i> | AGTCGGAAGG | AAAGGATCAG | CTTTCAA AAC | TTAAAGAGTT | GGCTTACATT |
| <i>P.huaijiensis</i>  | AGTCGGAAGG | AAAGGAGCAG | CTTTCAA AAC | TTAAAGAGTT | GGCTTATAAT |
| <i>P.lutea</i>        | AGTCAGAAAG | AAAGGAGCAG | CTTTCAA AAC | TTAAAGAGTT | GGCTTACATT |
| <i>P.pteropoda</i>    | AGTCGGAAGG | AAAGGATCAG | CTTTCAA AAC | TTAAAGAGTT | GGCTTACATT |
| <i>P.sinensis</i>     | AGTCGGAAGG | AAAGGAGCAG | CTTTCAA AAC | TTAAAGAGTT | GGCTTACATT |
| <i>P.swinglei</i>     | AGTCGGAAGG | AAAGGAGCAG | CTTTCAA AAC | TTAAAGAGTT | GGCTTACATT |
| <i>P.tabacum</i>      | AGTCGGAAGG | AAAGGAGCAG | CTTTCAA AAC | TTAAAGAGTT | GGCTTACATT |
| <i>P.villosissima</i> | AGTCGGAAGG | AAAGGAGCAG | CTTTCAA AAC | TTAAAGAGTT | GGCTTACATT |

|                       | 2710       | 2720        | 2730       | 2740       | 2750       |
|-----------------------|------------|-------------|------------|------------|------------|
| <i>P.eburnea</i>      | AGGCAGGAGA | TGAAGAAATCC | TCTAAATGGA | ATCCGCTTCA | CACATGGACT |
| <i>P.fimbrispala</i>  | AGGCAGGAGA | TGAAGAAATCC | TCTAAATGGA | ATCCGCTTCA | CACATGGACT |
| <i>P.heterotricha</i> | AGGCAGGAGA | TGAAGAAATCC | TCTAAATGGA | ATCCGCTTCA | CACATGGACT |
| <i>P.huaijiensis</i>  | AGGCAGGAGA | TGAAGAAATCC | TCTAAATGGA | ATCCGCTTCA | CACATGGACT |
| <i>P.lutea</i>        | AGGCAGGAGA | TGAAGAAATCC | TCTAAATGGA | ATCCGCTTCA | CACATGGACT |
| <i>P.pteropoda</i>    | AGGCAGGAGA | TGAAGAAATCC | TCTAAATGGA | ATCCGCTTCA | CACATGGACT |
| <i>P.sinensis</i>     | AGGCAGGAGA | TGAAGAAATCC | TCTAAATGGA | ATCCGCTTCA | CACATGGACT |
| <i>P.swinglei</i>     | AGGCAGGAGA | TGAAGAAATCC | TCTAAATGGA | ATCCGCTTCA | CACATGGACT |
| <i>P.tabacum</i>      | AGGCAGGAGA | TGAAGAAATCC | TCTAAATGGA | ATCCGCTTCA | CACATGGACT |
| <i>P.villosissima</i> | AGGCAGGAGA | TGAAGAAATCC | TCTAAATGGA | ATCCGCTTCA | CACATGGACT |

|                       | 2760       | 2770       | 2780       | 2790       | 2800       |
|-----------------------|------------|------------|------------|------------|------------|
| <i>P.eburnea</i>      | CCTGGGAAAT | TCAGCTCTAA | CAGAAGACCA | GAAACGGTTT | ATTGAGACTA |
| <i>P.fimbrispala</i>  | CCTGGGAAAT | TCAGCTCTAA | CAGAAGACCA | GAAACGGTTT | ATTGAGACTA |
| <i>P.heterotricha</i> | CCTGGGAAAT | TCAGCTCTAA | CAGAAGACCA | GAAACGGTTT | ATTGAGACTA |
| <i>P.huaijiensis</i>  | CCTGGGAAAT | TCAGCTCTAA | CAGAAGACCA | GAAACGGTTT | ATTGAGACTA |
| <i>P.lutea</i>        | CCTGGGAAAT | TCAGCTCTAA | CAGAAGACCA | GAAACGGTTT | ATTGAGACTA |
| <i>P.pteropoda</i>    | CCTGGGAAAT | TCAGCTCTAA | CAGAAGACCA | GAAACGGTTT | ATTGAGACTA |
| <i>P.sinensis</i>     | CCTGGGAAAT | TCAGCTCTAA | CAGAAGACCA | GAAACGGTTT | ATTGAGACTA |
| <i>P.swinglei</i>     | CCTGGGAAAT | TCAGCTCTAA | CAGAAGACCA | GAAACGGTTT | ATTGAGACTA |
| <i>P.tabacum</i>      | CCTGGGAAAT | TCAGCTCTAA | CAGAAGACCA | GAAACGGTTT | ATTGAGACTA |
| <i>P.villosissima</i> | CCTGGGAAAT | TCAGCTCTAA | CAGAAGACCA | GAAACGGTTT | ATTGAGACTA |

|                       | 2810                | 2820                | 2830                | 2840                | 2850                |
|-----------------------|---------------------|---------------------|---------------------|---------------------|---------------------|
| <i>P.eburnea</i>      | G T G A A G C T T G | T G A A A G A C A A | A T T T T A T C T A | T T T T A G A C G A | T C C A C A T T T T |
| <i>P.fimbrispala</i>  | G C G A A G C T T G | T G A A A G A C A A | A T T T T A T C T A | T T T T A G A C G A | T C C A C A T T T T |
| <i>P.heterotricha</i> | G T G A A G C T T G | T G A A A G A C A A | A T T T T A T C T A | T T T T A G A C G A | T C C A C A T T T T |
| <i>P.huaijiensis</i>  | G T G A A G C T T G | T G A A A G A C A A | A T T T T A T C T A | T T T T A G A C G A | T C C A C A T T T T |
| <i>P.lutea</i>        | G C G A A G C T T G | T G A A A G A C A A | A T T T T A T C T A | T T T T A G A C G A | T C C A C A T T T T |
| <i>P.pteropoda</i>    | G T G A A G C T T G | T G A A A G A C A A | A T T T T A T C T A | T T T T A G A C G A | T C C A C A T T T T |
| <i>P.sinensis</i>     | G C G A A G C T T G | T G A A A G A C A A | A T T T T A T C T A | T T T T A G A C G A | T C C A C A T T T T |
| <i>P.swinglei</i>     | G T G A A G C T T G | C G A A A G A C A A | A T T T T A T C T A | T T T T A G A C G A | T A C A C A T T T T |
| <i>P.tabacum</i>      | G C G A A G C T T G | T G A A A G A C A A | A T T T T A T C T A | T T T T A G A C G A | T C C A C A T T T T |
| <i>P.villosissima</i> | G C G A A G C T T G | C G A A A G A C A A | A T T T T A T C T A | T T T T A G A T G A | T C C A C A T T T T |

|                       | 2860                | 2870                | 2880                | 2890                | 2900                |
|-----------------------|---------------------|---------------------|---------------------|---------------------|---------------------|
| <i>P.eburnea</i>      | G G A A G T T C A C | A A G A A G G T G A | A C T G G A G C T T | A A G A T G G A A G | A G T T T T T C T T |
| <i>P.fimbrispala</i>  | G G A A G T T C A C | A A G A A G G T G A | A C T G G A G C T T | A A G A T G G A A G | A G T T T T T C T T |
| <i>P.heterotricha</i> | G G A A G T T C A C | A A G A A G G T G A | A C T G G A G C T T | A A G A T G G A A G | A G T T T T T C T T |
| <i>P.huaijiensis</i>  | G G A A G T T C A C | A A G A A G G T G A | A C T G G A G C T T | A A G A T G G A A G | A G T T T T T C T T |
| <i>P.lutea</i>        | G G A A G T T C A C | A A G A A G G T G A | A C T G G A G C T T | A A G A T G G A A G | A G T T T T T C T T |
| <i>P.pteropoda</i>    | G G A A G T T C A C | A A G A A G G T G A | A C T G G A G C T T | A A G A T G G A A G | A G T T T T T C T T |
| <i>P.sinensis</i>     | G G A A G T T C A C | A A G A A G G T G A | A C T G G A G C T T | A A G A T G G A A G | A G T T T T T C T T |
| <i>P.swinglei</i>     | G G A A G T T C A C | A A G A A G G T G A | A C C G G A G C T T | A A G A T G G A A G | A G T T T T T C T T |
| <i>P.tabacum</i>      | G G A A G T T C A C | A A G A A G G T G A | A C T G G A G C T T | A A G A T G G A A G | A G T T T T T C T T |
| <i>P.villosissima</i> | G G A A G T T C A C | A A G A A G G T G A | A C T G G A G C T T | A A G A T G G A A G | A G T T T T T C T T |

|                       | 2910                | 2920                | 2930                | 2940                | 2950                |
|-----------------------|---------------------|---------------------|---------------------|---------------------|---------------------|
| <i>P.eburnea</i>      | G G G G A A T G T T | A T C A A C G C T A | T T G T T T G T C A | G G C T A T G A T A | T T G T T G A A T G |
| <i>P.fimbrispala</i>  | G G G G A A T G T T | A T C A A C G C T A | T T G T T T G T C A | G G C T A T G A T A | T T G T T G A A T G |
| <i>P.heterotricha</i> | G G G G A A T G T T | A T C A A C G C T A | T T G T T T G T C A | G G C T A T G A T A | C T G T T G A A T G |
| <i>P.huaijiensis</i>  | G G G G A A T G T T | A T C A A C G C T A | T T G T T T G T C A | G G C T A T G A T A | T T G T T G A A T G |
| <i>P.lutea</i>        | G G G G A A T G T T | A T C A A C G C T A | T T G T T T G T C A | G G C T A T G A T A | T T G T T G A A T G |
| <i>P.pteropoda</i>    | G G G G A A T G T T | A T C A A C G C T A | T T G T T T G T C A | G G C T A T G A T A | C T G T T G A A C G |
| <i>P.sinensis</i>     | G G G G A A T G T T | A T C A A C G C T A | T T G T T T G T C A | G G C T A T G A T A | T T G T T G A A T G |
| <i>P.swinglei</i>     | G G G G A A T G T T | A T C A A C G C T A | T T G T T T G T C A | G G C T A T G A T A | C T G T T G A A T G |
| <i>P.tabacum</i>      | G G G G A A T G T T | A T C A A C G C T A | T T G T T T G T C A | G G C T A T G A T A | T T G T T G A A T G |
| <i>P.villosissima</i> | G G G G A A T G T T | A T C A A C G C T A | T T G T T T G T C A | G G C T A T G A T A | T T G T T G A A T G |

|                       | 2960                | 2970                | 2980                | 2990                | 3000                |
|-----------------------|---------------------|---------------------|---------------------|---------------------|---------------------|
| <i>P.eburnea</i>      | A A A A G A A T T T | G A A A C T A G T A | C T G G A T G T C T | C T G A G C G A A T | T A G A A C T C T T |
| <i>P.fimbrispala</i>  | A A A A G A A T T T | G A A A C T A G T A | C T G G A T G T C T | C T G A G C G A A T | T A G A A C T C T T |
| <i>P.heterotricha</i> | A A A A G A A T T T | G A A A C T A G T A | C T G G A T G T C T | C T G A G C G A A T | T A G A A C T C T T |
| <i>P.huaijiensis</i>  | A A A A G A A T T T | G A A A C T A G T A | C T G G A T G T C T | C T G A G C G A A T | T A G A A C T A T T |
| <i>P.lutea</i>        | A A A A G A A T T T | G A A A C T A G T A | C T G G A T G T C T | C T G A G C G A A T | T A G A A C T C T T |
| <i>P.pteropoda</i>    | A A A A G A A T T T | G A A A C T A G T A | C T G G A T G T C T | C T G A G C G A A T | T A G A A C T C T T |
| <i>P.sinensis</i>     | A A A A G A A T A T | G A A A C T A G T A | C T G G A T G T C T | C T G A G C G A A T | T A G A A C T C T T |
| <i>P.swinglei</i>     | A A A A G A A T T T | G A A A C T A G T A | C T G G A T G T C T | C T G A G C G A A T | T A G A A C T C T T |
| <i>P.tabacum</i>      | A A A A G A A T T T | G A A A C T A G T A | C T G G A T G T C T | C T G A G C G A A T | T A G A A C T C T T |
| <i>P.villosissima</i> | A A A A G A A T T T | G A A A C T A G T A | C T G G A T G T C T | C T G A G C G A A T | T A G A A C T C T T |

|                       | 3010       | 3020       | 3030       | 3040       | 3050       |
|-----------------------|------------|------------|------------|------------|------------|
| <i>P.eburnea</i>      | TGTTTATATG | GGGATCAAAT | AAAGCTTCAG | TTAGCCTTGT | CTGATTTCTT |
| <i>P.fimbrispala</i>  | TGTTTATATG | GGGATCAAAT | AAAGCTTCAG | TTAGCCTTGT | CTGATTTCTT |
| <i>P.heterotricha</i> | TGTTTATATG | GAGATCAAAT | AAAGCTTCAG | TTAGCCTTGT | CTGATTTCTT |
| <i>P.huaijiensis</i>  | TGTTTATATG | GGGATCAAAT | AAAGCTTCAG | TTAGCCTTGT | CTGATTTCTT |
| <i>P.lutea</i>        | TGTTTATATG | GGGATCAAAT | AAAGCTTCAG | TTAGCCTTGT | CTGATTTCTT |
| <i>P.pteropoda</i>    | TGTTTATATG | GAGATCAAAT | AAAGCTTCAG | TTAGCCTTGT | CTGATTTCTT |
| <i>P.sinensis</i>     | TGTTTATATG | GGGATCAAAT | AAAGCTTCAG | TTAGCCTTGT | CTGATTTCTT |
| <i>P.swinglei</i>     | TGTTTATATG | GAGATCAGAT | AAAGCTTCAG | TTAGCCTTGT | CTGATTTCTT |
| <i>P.tabacum</i>      | TGTTTATATG | GGGATCAAAT | AAAGCTTCAG | TTAGCCTTGT | CTGATTTCTT |
| <i>P.villosissima</i> | TGTTTATATG | GGGATCAAAT | AAAGCTTCAG | TTAGCCTTGT | CTGATTTCTT |

|                       | 3060       | 3070       | 3080       | 3090       | 3100       |
|-----------------------|------------|------------|------------|------------|------------|
| <i>P.eburnea</i>      | GCTCAGTGTG | GTGGACCATA | CACCTTGTCC | TGATGGTTGG | GTGGAAATTA |
| <i>P.fimbrispala</i>  | GCTCAGTGTG | GTGGACCATA | CACCTTGTCC | TGATGGTTGG | GTGGAAATTA |
| <i>P.heterotricha</i> | GCTCAGTGTG | GTGGACCATA | CACATTGTCC | CGATGGTTGG | GTGGAAATTA |
| <i>P.huaijiensis</i>  | GCTCAGTGTG | GTGGACCATA | CACCTTGTCC | TGATGGTTGG | GTGGAAATTA |
| <i>P.lutea</i>        | GCTCAGTGTG | GTGGACCATA | CACCTTGTCC | TGATGGTTGG | GTGGAAATTA |
| <i>P.pteropoda</i>    | GCTCAGTGTG | GTGGACCATA | CACATTGTCC | CGATGGTTGG | GTGGAAATTA |
| <i>P.sinensis</i>     | GCTCAGTGTG | GTGGACCATA | CACCTTGTCC | TGATGGTTGG | GTGGAAATTA |
| <i>P.swinglei</i>     | GCTCAGTGTG | GTGGACCATA | CACCTTGTCC | TGATGGTTGG | GTGGAAATTA |
| <i>P.tabacum</i>      | GCTCAGTGTG | GTGGACCATA | CACCTTGTCC | TGATGGTTGG | GTGGAAATTA |
| <i>P.villosissima</i> | GCTCAGTGTG | GTGGACCATA | CACATTGTCC | TGATGGTTGG | GTGGAAATTA |

|                       | 3110       | 3120       | 3130       | 3140        | 3150       |
|-----------------------|------------|------------|------------|-------------|------------|
| <i>P.eburnea</i>      | TGGTATCCCC | TGGTTTGAAA | CTGATGCAAG | ACGGGAATGA  | GTCTGTTTCA |
| <i>P.fimbrispala</i>  | TGGTATCCCC | TGGTTTGAAA | CTGATGCAAG | ACGGGAATGA  | GTCTGTTTCA |
| <i>P.heterotricha</i> | TGGTATCCCC | TGGTTTGAAA | CTGATGCAAG | ACGGGAATGA  | GTCTGTTTCA |
| <i>P.huaijiensis</i>  | TGGTATCCCC | TGGTTTGAAA | CTGATGCAAG | ACGGGAATGA  | GTCTGTTTCA |
| <i>P.lutea</i>        | TGGTATCCCC | TGGTTTGAAA | CTGATGCAAG | ACGGGAATGA  | GTCTGTTTCA |
| <i>P.pteropoda</i>    | TGGTATCCCC | TGGTTTGAAA | CTGATGCAAG | ACGGGAATGA  | GTCTGTTTCA |
| <i>P.sinensis</i>     | TGGTATCCCC | TGGTTTGAAA | CTGATGCAAG | ACGGGCAATGA | GTCTGTTTCA |
| <i>P.swinglei</i>     | TGGTATCCCC | TGGTTTGAAA | CTGATGCAAG | ACGGGAATGA  | GTCTGTTTCA |
| <i>P.tabacum</i>      | TGGTATCCCC | TGGTTTGAAA | CTGATGCAAG | ACGGGAATGA  | GTCTGTTTCA |
| <i>P.villosissima</i> | TGGTATCCCC | TGGTTTGAAA | CTGATGCAAG | ACGGGAATGA  | GTCTGTTTCA |

|                       | 3160       | 3170        | 3180       | 3190       | 3200       |
|-----------------------|------------|-------------|------------|------------|------------|
| <i>P.eburnea</i>      | CTACAAATTC | GAAATGGCACA | CCCTGGCCAG | GGACTTCCCT | CTTCTCTTAT |
| <i>P.fimbrispala</i>  | CTACAAATTC | GAAATGGCACA | CCCTGGCCAG | GGCCTTCCCT | CTTCTCTTAT |
| <i>P.heterotricha</i> | CTACAAATTC | GAAATGGCACA | CCCTGGCCAG | GGCCTTCCCT | CTTCTCTTAT |
| <i>P.huaijiensis</i>  | CTACAAATTC | GAAATGGCACA | CCCTGGCCAG | GGCCTTCCCT | CTTCTCTTAT |
| <i>P.lutea</i>        | CTACAAATTC | GAAATGGCACA | CCCTGGCCAG | GGCCTTCCCT | CTTCTCTTAT |
| <i>P.pteropoda</i>    | CTACAAATTC | GAAATGGCACA | CCCTGGCCAG | GGCCTTCCCT | CTTCTCTTAT |
| <i>P.sinensis</i>     | CTACAAATTC | GAAATGGCACA | CCCTGGCCAG | GGCCTTCCCT | CTTCTCTTAT |
| <i>P.swinglei</i>     | CTACAAATTC | GAAATGGCACA | CCCTGGCCAG | GGCCTTCCCT | CTTCTCTTAT |
| <i>P.tabacum</i>      | CTACAAATTC | GAAATGGCACA | CCCTGGCCAG | GGCCTTCCCT | CTTCTCTTAT |
| <i>P.villosissima</i> | CTACAAATTC | GAAATGGCACA | CCCTGGCCAG | GGCCTTCCCT | CTTCTCTTAT |

|                       | 3210       | 3220       | 3230       | 3240       | 3250       |
|-----------------------|------------|------------|------------|------------|------------|
| <i>P.eburnea</i>      | TGAAGATATG | TATGCAGTGA | AAAGTAACTG | GTTAACTCAG | CCAGGAATTG |
| <i>P.fimbrispala</i>  | TGAAGATATG | TTTGCAGTGA | AAAGTAACTG | GTTAACTCAG | CGAGGAGCTA |
| <i>P.heterotricha</i> | TGAAGATATG | TTTGCAGTGA | AAAGTAACTG | GTTAACTCAG | CGAGGAATTG |
| <i>P.huaijiensis</i>  | TGAAGATATG | TTTGCAGTGA | AAAGTAACTG | GTTAACTCAG | CGAGGAATTG |
| <i>P.lutea</i>        | TGAAGATATG | TATGCAGTGA | AAAGTAACTG | GTTAACTCAG | CCAGGAATTG |
| <i>P.pteropoda</i>    | TGAAGATATG | TTTGCAGTGA | AAAGTAACTG | GTTAACTCAG | CGAGGAATTG |
| <i>P.sinensis</i>     | TGAAGATATG | TTTGCAGTGA | AAAGTAACTG | GTTAACTCAG | CGAGGAATTG |
| <i>P.swinglei</i>     | TGAAGATATG | TTTGCAGTGA | AAAGTAACTG | GTTAACTCAG | CGAGGAATTG |
| <i>P.tabacum</i>      | TGAAGATATG | TATGCAGTGA | AAAGTAACTG | GTTAACTCAG | CGAGGAATTG |
| <i>P.villosissima</i> | TGAAGATATG | TTTGCAGTGA | AAAGTAACTG | GTTAACTCAG | CGAGGAATTG |

|                       | 3260       | 3270       | 3280       | 3290       | 3300        |
|-----------------------|------------|------------|------------|------------|-------------|
| <i>P.eburnea</i>      | CTCTCAACAT | TGCTCAGAAA | CTTCTCAAAA | CGATGAATGG | TAAATGTCCGG |
| <i>P.fimbrispala</i>  | CTCTCAACAT | TGCTCAGAAA | CTTCTCAAAA | CGATGAATGG | TAAATGTCCGG |
| <i>P.heterotricha</i> | CTCTCAACAT | TGCTCAGAAA | CTTCTCAAAA | CGATGAATGG | TAAATGTCCGG |
| <i>P.huaijiensis</i>  | CTCTCAACAT | TGCTCAGAAA | CTTCTCAAAA | CGATGAATGG | TAAATGTCCGG |
| <i>P.lutea</i>        | CTCTCAACAT | TGCTCAGAAA | CTTCTCAAAA | CGATGAATGG | TAAATGTCCGG |
| <i>P.pteropoda</i>    | CTCTCAACAT | TGCTCAGAAA | CTTCTCAAAA | CGATGAATGG | TAAATGTCCGG |
| <i>P.sinensis</i>     | CTCTCAACAT | GGCTCAGAAA | CTTCTCAAAA | CGATGAATGG | TAAATGTCCGG |
| <i>P.swinglei</i>     | CTCTCAACAT | TGCTCAGAAA | CTTCTCAAAA | CGATGAATGG | TAAATGTCCGG |
| <i>P.tabacum</i>      | CTCTCAACAT | TGCTCAGAAA | CTTCTCAAAA | CGATGAATGG | TAAATGTCCGG |
| <i>P.villosissima</i> | CTCTCAACAT | TGCTCAGAAA | CTTCTCAAAA | CGATGAATGG | TAAATGTCCGG |

|                       | 3310                | 3320                | 3330                | 3340                | 3350                |
|-----------------------|---------------------|---------------------|---------------------|---------------------|---------------------|
| <i>P.eburnea</i>      | T A T A T C A G A G | A T C A G A G T A G | A T G T T A C T T C | T T A G T T G A T C | T T G A A C T C A T |
| <i>P.fimbrisepala</i> | T A T A T C A G A G | A T C A G A G T A G | A T G T T A C T T C | T T A G T T G A T C | T T G A A C T C A T |
| <i>P.heterotricha</i> | T A T A T C A G A G | A T C A G A G T A G | A T G T T A C T T C | T T A G T T G A T C | T T G A T C T C A T |
| <i>P.huaijiensis</i>  | T A T A T C A G A G | A T C A G A G T A G | A T G T T A C T T C | T T A G T T G A T C | T T G A A C T C G T |
| <i>P.lutea</i>        | T A T A T C A G A G | A T C A G A G T A G | A T G T T A C T T C | T T A G T T G A T C | T T G A A C T C A T |
| <i>P.pteropoda</i>    | T A T A T C A G A G | A T C A G A G T A G | A T G T T A C T T C | T T A G T T G A T C | T T G A T C T C A T |
| <i>P.sinensis</i>     | T A T A T C A G A G | A T C A G A G T A G | A T G T T A C T T C | T T A G T T G A T C | T T G A A C T C A T |
| <i>P.swinglei</i>     | T A T A T C A G A G | A T C A G A G T A G | A T G T T A C T T C | C T A G T T G A T C | T T G A G C T T A T |
| <i>P.tabacum</i>      | T A T A T C A G A G | A T C A G A G T A G | A T G T T A C T T C | T T A G T T G A T C | T T G A A C T C A T |
| <i>P.villosissima</i> | T A T A T C A G A G | A T C A G A G T A G | A T G T T A C T T C | T T A G T T G A T C | T T G A A C T C A T |

|                       | 3360                | 3370                |     |
|-----------------------|---------------------|---------------------|-----|
| <i>P.eburnea</i>      | T T C A C G G A A A | T C A G A T C A A T | A A |
| <i>P.fimbrisepala</i> | T T C A C G G A A A | T C A G A T C A A T | A A |
| <i>P.heterotricha</i> | T T C A C G G A A A | T C A G A T C A A T | A A |
| <i>P.huaijiensis</i>  | T T C A C G G A A A | T C A G A T C A A T | A A |
| <i>P.lutea</i>        | T T C A C G G A A A | T C A G A T C A A T | A A |
| <i>P.pteropoda</i>    | T T C A C G G A A A | T C A G A T C A A T | A A |
| <i>P.sinensis</i>     | T T C A C G G A A A | T C A G A T C A A T | A A |
| <i>P.swinglei</i>     | T T C G C G G A A A | T C A G A T C A A T | A A |
| <i>P.tabacum</i>      | T T C A C G G A A A | T C A G T T C A A T | A A |
| <i>P.villosissima</i> | T T C A C G G A A A | T C A G A T C A A T | A A |
